# Supplementary material for: Putting the theory into ‘burstlet theory’ with a biophysical model of burstlets and bursts in the respiratory preBötzinger complex
Source: eLife. 2022 Apr 5;11:e75713. doi: 10.7554/eLife.75713 (PMC9023056; doi:10.7554/eLife.75713)
Supplement: Figure 1—source data 1. [file elife-75713-fig1-data1.xlsx]

## Sheet: Sheet1
Pulse Frequency	Pulse Amplitude	Fraction of Low Amplitude Events
0.01	0.002	1
0.01	0.0024483	1
0.01	0.0028966	1
0.01	0.0033448	1
0.01	0.0037931	1
0.01	0.0042414	1
0.01	0.0046897	1
0.01	0.0051379	1
0.01	0.0055862	1
0.01	0.0060345	1
0.01	0.0064828	1
0.01	0.006931	1
0.01	0.0073793	1
0.01	0.0078276	1
0.01	0.0082759	1
0.01	0.0087241	1
0.01	0.0091724	1
0.01	0.0096207	1
0.01	0.010069	1
0.01	0.010517	1
0.01	0.010966	1
0.01	0.011414	1
0.01	0.011862	1
0.01	0.01231	1
0.01	0.012759	1
0.01	0.013207	1
0.01	0.013655	1
0.01	0.014103	1
0.01	0.014552	1
0.01	0.015	1
0.0234483	0.002	1
0.0234483	0.0024483	1
0.0234483	0.0028966	1
0.0234483	0.0033448	1
0.0234483	0.0037931	1
0.0234483	0.0042414	1
0.0234483	0.0046897	1
0.0234483	0.0051379	1
0.0234483	0.0055862	1
0.0234483	0.0060345	1
0.0234483	0.0064828	1
0.0234483	0.006931	1
0.0234483	0.0073793	1
0.0234483	0.0078276	1
0.0234483	0.0082759	1
0.0234483	0.0087241	1
0.0234483	0.0091724	1
0.0234483	0.0096207	1
0.0234483	0.010069	1
0.0234483	0.010517	1
0.0234483	0.010966	0.666667
0.0234483	0.011414	0.5
0.0234483	0.011862	0.5
0.0234483	0.01231	0.5
0.0234483	0.012759	0.5
0.0234483	0.013207	0.5
0.0234483	0.013655	0.5
0.0234483	0.014103	0
0.0234483	0.014552	0
0.0234483	0.015	0
0.0368966	0.002	1
0.0368966	0.0024483	1
0.0368966	0.0028966	1
0.0368966	0.0033448	1
0.0368966	0.0037931	1
0.0368966	0.0042414	1
0.0368966	0.0046897	1
0.0368966	0.0051379	1
0.0368966	0.0055862	1
0.0368966	0.0060345	1
0.0368966	0.0064828	1
0.0368966	0.006931	1
0.0368966	0.0073793	1
0.0368966	0.0078276	1
0.0368966	0.0082759	0.75
0.0368966	0.0087241	0.666667
0.0368966	0.0091724	0.666667
0.0368966	0.0096207	0.666667
0.0368966	0.010069	0.5
0.0368966	0.010517	0.5
0.0368966	0.010966	0.5
0.0368966	0.011414	0.5
0.0368966	0.011862	0.5
0.0368966	0.01231	0.5
0.0368966	0.012759	0.5
0.0368966	0.013207	0
0.0368966	0.013655	0
0.0368966	0.014103	0
0.0368966	0.014552	0
0.0368966	0.015	0
0.0503448	0.002	1
0.0503448	0.0024483	1
0.0503448	0.0028966	1
0.0503448	0.0033448	1
0.0503448	0.0037931	1
0.0503448	0.0042414	1
0.0503448	0.0046897	1
0.0503448	0.0051379	1
0.0503448	0.0055862	1
0.0503448	0.0060345	1
0.0503448	0.0064828	0.833333
0.0503448	0.006931	0.8
0.0503448	0.0073793	0.75
0.0503448	0.0078276	0.75
0.0503448	0.0082759	0.666667
0.0503448	0.0087241	0.666667
0.0503448	0.0091724	0.666667
0.0503448	0.0096207	0.5
0.0503448	0.010069	0.5
0.0503448	0.010517	0.5
0.0503448	0.010966	0.5
0.0503448	0.011414	0.5
0.0503448	0.011862	0.5
0.0503448	0.01231	0.5
0.0503448	0.012759	0
0.0503448	0.013207	0
0.0503448	0.013655	0
0.0503448	0.014103	0
0.0503448	0.014552	0
0.0503448	0.015	0
0.0637931	0.002	1
0.0637931	0.0024483	1
0.0637931	0.0028966	1
0.0637931	0.0033448	1
0.0637931	0.0037931	1
0.0637931	0.0042414	1
0.0637931	0.0046897	1
0.0637931	0.0051379	1
0.0637931	0.0055862	0.875
0.0637931	0.0060345	0.833333
0.0637931	0.0064828	0.8
0.0637931	0.006931	0.75
0.0637931	0.0073793	0.75
0.0637931	0.0078276	0.666667
0.0637931	0.0082759	0.666667
0.0637931	0.0087241	0.666667
0.0637931	0.0091724	0.5
0.0637931	0.0096207	0.5
0.0637931	0.010069	0.5
0.0637931	0.010517	0.5
0.0637931	0.010966	0.5
0.0637931	0.011414	0.5
0.0637931	0.011862	0.5
0.0637931	0.01231	0
0.0637931	0.012759	0
0.0637931	0.013207	0
0.0637931	0.013655	0
0.0637931	0.014103	0
0.0637931	0.014552	0
0.0637931	0.015	0
0.0772414	0.002	1
0.0772414	0.0024483	1
0.0772414	0.0028966	1
0.0772414	0.0033448	1
0.0772414	0.0037931	1
0.0772414	0.0042414	1
0.0772414	0.0046897	1
0.0772414	0.0051379	0.875
0.0772414	0.0055862	0.833333
0.0772414	0.0060345	0.8
0.0772414	0.0064828	0.75
0.0772414	0.006931	0.75
0.0772414	0.0073793	0.666667
0.0772414	0.0078276	0.666667
0.0772414	0.0082759	0.666667
0.0772414	0.0087241	0.5
0.0772414	0.0091724	0.5
0.0772414	0.0096207	0.5
0.0772414	0.010069	0.5
0.0772414	0.010517	0.5
0.0772414	0.010966	0.5
0.0772414	0.011414	0.5
0.0772414	0.011862	0.5
0.0772414	0.01231	0
0.0772414	0.012759	0
0.0772414	0.013207	0
0.0772414	0.013655	0
0.0772414	0.014103	0
0.0772414	0.014552	0
0.0772414	0.015	0
0.0906897	0.002	1
0.0906897	0.0024483	1
0.0906897	0.0028966	1
0.0906897	0.0033448	1
0.0906897	0.0037931	1
0.0906897	0.0042414	1
0.0906897	0.0046897	0.888889
0.0906897	0.0051379	0.857143
0.0906897	0.0055862	0.833333
0.0906897	0.0060345	0.8
0.0906897	0.0064828	0.75
0.0906897	0.006931	0.75
0.0906897	0.0073793	0.666667
0.0906897	0.0078276	0.666667
0.0906897	0.0082759	0.666667
0.0906897	0.0087241	0.5
0.0906897	0.0091724	0.5
0.0906897	0.0096207	0.5
0.0906897	0.010069	0.5
0.0906897	0.010517	0.5
0.0906897	0.010966	0.5
0.0906897	0.011414	0.5
0.0906897	0.011862	0.5
0.0906897	0.01231	0
0.0906897	0.012759	0
0.0906897	0.013207	0
0.0906897	0.013655	0
0.0906897	0.014103	0
0.0906897	0.014552	0
0.0906897	0.015	0
0.104138	0.002	1
0.104138	0.0024483	1
0.104138	0.0028966	1
0.104138	0.0033448	1
0.104138	0.0037931	1
0.104138	0.0042414	0.909091
0.104138	0.0046897	0.875
0.104138	0.0051379	0.857143
0.104138	0.0055862	0.8
0.104138	0.0060345	0.8
0.104138	0.0064828	0.75
0.104138	0.006931	0.75
0.104138	0.0073793	0.666667
0.104138	0.0078276	0.666667
0.104138	0.0082759	0.666667
0.104138	0.0087241	0.5
0.104138	0.0091724	0.5
0.104138	0.0096207	0.5
0.104138	0.010069	0.5
0.104138	0.010517	0.5
0.104138	0.010966	0.5
0.104138	0.011414	0.5
0.104138	0.011862	0.5
0.104138	0.01231	0
0.104138	0.012759	0
0.104138	0.013207	0
0.104138	0.013655	0
0.104138	0.014103	0
0.104138	0.014552	0
0.104138	0.015	0
0.117586	0.002	1
0.117586	0.0024483	1
0.117586	0.0028966	1
0.117586	0.0033448	1
0.117586	0.0037931	0.928571
0.117586	0.0042414	0.9
0.117586	0.0046897	0.875
0.117586	0.0051379	0.833333
0.117586	0.0055862	0.8
0.117586	0.0060345	0.75
0.117586	0.0064828	0.75
0.117586	0.006931	0.666667
0.117586	0.0073793	0.666667
0.117586	0.0078276	0.666667
0.117586	0.0082759	0.666667
0.117586	0.0087241	0.5
0.117586	0.0091724	0.5
0.117586	0.0096207	0.5
0.117586	0.010069	0.5
0.117586	0.010517	0.5
0.117586	0.010966	0.5
0.117586	0.011414	0.5
0.117586	0.011862	0.428571
0.117586	0.01231	0
0.117586	0.012759	0
0.117586	0.013207	0
0.117586	0.013655	0
0.117586	0.014103	0
0.117586	0.014552	0
0.117586	0.015	0
0.131034	0.002	1
0.131034	0.0024483	1
0.131034	0.0028966	1
0.131034	0.0033448	1
0.131034	0.0037931	0.923077
0.131034	0.0042414	0.888889
0.131034	0.0046897	0.857143
0.131034	0.0051379	0.833333
0.131034	0.0055862	0.8
0.131034	0.0060345	0.75
0.131034	0.0064828	0.75
0.131034	0.006931	0.666667
0.131034	0.0073793	0.666667
0.131034	0.0078276	0.666667
0.131034	0.0082759	0.611111
0.131034	0.0087241	0.5
0.131034	0.0091724	0.5
0.131034	0.0096207	0.5
0.131034	0.010069	0.5
0.131034	0.010517	0.5
0.131034	0.010966	0.5
0.131034	0.011414	0.5
0.131034	0.011862	0.378378
0.131034	0.01231	0
0.131034	0.012759	0
0.131034	0.013207	0
0.131034	0.013655	0
0.131034	0.014103	0
0.131034	0.014552	0
0.131034	0.015	0
0.144483	0.002	1
0.144483	0.0024483	1
0.144483	0.0028966	1
0.144483	0.0033448	0.941176
0.144483	0.0037931	0.916667
0.144483	0.0042414	0.888889
0.144483	0.0046897	0.857143
0.144483	0.0051379	0.833333
0.144483	0.0055862	0.8
0.144483	0.0060345	0.75
0.144483	0.0064828	0.75
0.144483	0.006931	0.666667
0.144483	0.0073793	0.666667
0.144483	0.0078276	0.666667
0.144483	0.0082759	0.5
0.144483	0.0087241	0.5
0.144483	0.0091724	0.5
0.144483	0.0096207	0.5
0.144483	0.010069	0.5
0.144483	0.010517	0.5
0.144483	0.010966	0.5
0.144483	0.011414	0.5
0.144483	0.011862	0.428571
0.144483	0.01231	0
0.144483	0.012759	0
0.144483	0.013207	0
0.144483	0.013655	0
0.144483	0.014103	0
0.144483	0.014552	0
0.144483	0.015	0
0.157931	0.002	1
0.157931	0.0024483	1
0.157931	0.0028966	1
0.157931	0.0033448	0.9375
0.157931	0.0037931	0.909091
0.157931	0.0042414	0.888889
0.157931	0.0046897	0.857143
0.157931	0.0051379	0.833333
0.157931	0.0055862	0.8
0.157931	0.0060345	0.75
0.157931	0.0064828	0.75
0.157931	0.006931	0.666667
0.157931	0.0073793	0.666667
0.157931	0.0078276	0.666667
0.157931	0.0082759	0.5
0.157931	0.0087241	0.5
0.157931	0.0091724	0.5
0.157931	0.0096207	0.5
0.157931	0.010069	0.5
0.157931	0.010517	0.5
0.157931	0.010966	0.5
0.157931	0.011414	0.5
0.157931	0.011862	0.468085
0.157931	0.01231	0
0.157931	0.012759	0
0.157931	0.013207	0
0.157931	0.013655	0
0.157931	0.014103	0
0.157931	0.014552	0
0.157931	0.015	0
0.171379	0.002	1
0.171379	0.0024483	1
0.171379	0.0028966	0.954545
0.171379	0.0033448	0.933333
0.171379	0.0037931	0.909091
0.171379	0.0042414	0.875
0.171379	0.0046897	0.857143
0.171379	0.0051379	0.833333
0.171379	0.0055862	0.8
0.171379	0.0060345	0.75
0.171379	0.0064828	0.75
0.171379	0.006931	0.666667
0.171379	0.0073793	0.666667
0.171379	0.0078276	0.666667
0.171379	0.0082759	0.5
0.171379	0.0087241	0.5
0.171379	0.0091724	0.5
0.171379	0.0096207	0.5
0.171379	0.010069	0.5
0.171379	0.010517	0.5
0.171379	0.010966	0.5
0.171379	0.011414	0.5
0.171379	0.011862	0.5
0.171379	0.01231	0
0.171379	0.012759	0
0.171379	0.013207	0
0.171379	0.013655	0
0.171379	0.014103	0
0.171379	0.014552	0
0.171379	0.015	0
0.184828	0.002	1
0.184828	0.0024483	1
0.184828	0.0028966	0.952381
0.184828	0.0033448	0.928571
0.184828	0.0037931	0.909091
0.184828	0.0042414	0.875
0.184828	0.0046897	0.857143
0.184828	0.0051379	0.833333
0.184828	0.0055862	0.8
0.184828	0.0060345	0.75
0.184828	0.0064828	0.75
0.184828	0.006931	0.666667
0.184828	0.0073793	0.666667
0.184828	0.0078276	0.666667
0.184828	0.0082759	0.5
0.184828	0.0087241	0.5
0.184828	0.0091724	0.5
0.184828	0.0096207	0.5
0.184828	0.010069	0.5
0.184828	0.010517	0.5
0.184828	0.010966	0.5
0.184828	0.011414	0.5
0.184828	0.011862	0.5
0.184828	0.01231	0
0.184828	0.012759	0
0.184828	0.013207	0
0.184828	0.013655	0
0.184828	0.014103	0
0.184828	0.014552	0
0.184828	0.015	0
0.198276	0.002	1
0.198276	0.0024483	1
0.198276	0.0028966	0.95
0.198276	0.0033448	0.928571
0.198276	0.0037931	0.9
0.198276	0.0042414	0.875
0.198276	0.0046897	0.857143
0.198276	0.0051379	0.833333
0.198276	0.0055862	0.8
0.198276	0.0060345	0.75
0.198276	0.0064828	0.75
0.198276	0.006931	0.666667
0.198276	0.0073793	0.666667
0.198276	0.0078276	0.666667
0.198276	0.0082759	0.5
0.198276	0.0087241	0.5
0.198276	0.0091724	0.5
0.198276	0.0096207	0.5
0.198276	0.010069	0.5
0.198276	0.010517	0.5
0.198276	0.010966	0.5
0.198276	0.011414	0.5
0.198276	0.011862	0.5
0.198276	0.01231	0
0.198276	0.012759	0
0.198276	0.013207	0
0.198276	0.013655	0
0.198276	0.014103	0
0.198276	0.014552	0
0.198276	0.015	0
0.211724	0.002	1
0.211724	0.0024483	1
0.211724	0.0028966	0.947368
0.211724	0.0033448	0.923077
0.211724	0.0037931	0.9
0.211724	0.0042414	0.875
0.211724	0.0046897	0.857143
0.211724	0.0051379	0.8
0.211724	0.0055862	0.8
0.211724	0.0060345	0.75
0.211724	0.0064828	0.75
0.211724	0.006931	0.666667
0.211724	0.0073793	0.666667
0.211724	0.0078276	0.666667
0.211724	0.0082759	0.5
0.211724	0.0087241	0.5
0.211724	0.0091724	0.5
0.211724	0.0096207	0.5
0.211724	0.010069	0.5
0.211724	0.010517	0.5
0.211724	0.010966	0.5
0.211724	0.011414	0.5
0.211724	0.011862	0.5
0.211724	0.01231	0
0.211724	0.012759	0
0.211724	0.013207	0
0.211724	0.013655	0
0.211724	0.014103	0
0.211724	0.014552	0
0.211724	0.015	0
0.225172	0.002	1
0.225172	0.0024483	0.965517
0.225172	0.0028966	0.944444
0.225172	0.0033448	0.923077
0.225172	0.0037931	0.9
0.225172	0.0042414	0.875
0.225172	0.0046897	0.833333
0.225172	0.0051379	0.8
0.225172	0.0055862	0.8
0.225172	0.0060345	0.75
0.225172	0.0064828	0.75
0.225172	0.006931	0.666667
0.225172	0.0073793	0.666667
0.225172	0.0078276	0.666667
0.225172	0.0082759	0.5
0.225172	0.0087241	0.5
0.225172	0.0091724	0.5
0.225172	0.0096207	0.5
0.225172	0.010069	0.5
0.225172	0.010517	0.5
0.225172	0.010966	0.5
0.225172	0.011414	0.5
0.225172	0.011862	0.5
0.225172	0.01231	0
0.225172	0.012759	0
0.225172	0.013207	0
0.225172	0.013655	0
0.225172	0.014103	0
0.225172	0.014552	0
0.225172	0.015	0
0.238621	0.002	1
0.238621	0.0024483	0.964286
0.238621	0.0028966	0.944444
0.238621	0.0033448	0.923077
0.238621	0.0037931	0.9
0.238621	0.0042414	0.875
0.238621	0.0046897	0.833333
0.238621	0.0051379	0.8
0.238621	0.0055862	0.8
0.238621	0.0060345	0.75
0.238621	0.0064828	0.75
0.238621	0.006931	0.666667
0.238621	0.0073793	0.666667
0.238621	0.0078276	0.666667
0.238621	0.0082759	0.5
0.238621	0.0087241	0.5
0.238621	0.0091724	0.5
0.238621	0.0096207	0.5
0.238621	0.010069	0.5
0.238621	0.010517	0.5
0.238621	0.010966	0.5
0.238621	0.011414	0.5
0.238621	0.011862	0.5
0.238621	0.01231	0
0.238621	0.012759	0
0.238621	0.013207	0
0.238621	0.013655	0
0.238621	0.014103	0
0.238621	0.014552	0
0.238621	0.015	0
0.252069	0.002	1
0.252069	0.0024483	0.962963
0.252069	0.0028966	0.941176
0.252069	0.0033448	0.923077
0.252069	0.0037931	0.9
0.252069	0.0042414	0.875
0.252069	0.0046897	0.833333
0.252069	0.0051379	0.8
0.252069	0.0055862	0.8
0.252069	0.0060345	0.75
0.252069	0.0064828	0.75
0.252069	0.006931	0.666667
0.252069	0.0073793	0.666667
0.252069	0.0078276	0.666667
0.252069	0.0082759	0.5
0.252069	0.0087241	0.5
0.252069	0.0091724	0.5
0.252069	0.0096207	0.5
0.252069	0.010069	0.5
0.252069	0.010517	0.5
0.252069	0.010966	0.5
0.252069	0.011414	0.5
0.252069	0.011862	0.5
0.252069	0.01231	0
0.252069	0.012759	0
0.252069	0.013207	0
0.252069	0.013655	0
0.252069	0.014103	0
0.252069	0.014552	0
0.252069	0.015	0
0.265517	0.002	1
0.265517	0.0024483	0.961538
0.265517	0.0028966	0.941176
0.265517	0.0033448	0.916667
0.265517	0.0037931	0.9
0.265517	0.0042414	0.875
0.265517	0.0046897	0.833333
0.265517	0.0051379	0.8
0.265517	0.0055862	0.8
0.265517	0.0060345	0.75
0.265517	0.0064828	0.75
0.265517	0.006931	0.666667
0.265517	0.0073793	0.666667
0.265517	0.0078276	0.666667
0.265517	0.0082759	0.5
0.265517	0.0087241	0.5
0.265517	0.0091724	0.5
0.265517	0.0096207	0.5
0.265517	0.010069	0.5
0.265517	0.010517	0.5
0.265517	0.010966	0.5
0.265517	0.011414	0.5
0.265517	0.011862	0.5
0.265517	0.01231	0
0.265517	0.012759	0
0.265517	0.013207	0
0.265517	0.013655	0
0.265517	0.014103	0
0.265517	0.014552	0
0.265517	0.015	0
0.278966	0.002	1
0.278966	0.0024483	0.96
0.278966	0.0028966	0.941176
0.278966	0.0033448	0.916667
0.278966	0.0037931	0.888889
0.278966	0.0042414	0.875
0.278966	0.0046897	0.833333
0.278966	0.0051379	0.8
0.278966	0.0055862	0.8
0.278966	0.0060345	0.75
0.278966	0.0064828	0.75
0.278966	0.006931	0.666667
0.278966	0.0073793	0.666667
0.278966	0.0078276	0.666667
0.278966	0.0082759	0.5
0.278966	0.0087241	0.5
0.278966	0.0091724	0.5
0.278966	0.0096207	0.5
0.278966	0.010069	0.5
0.278966	0.010517	0.5
0.278966	0.010966	0.5
0.278966	0.011414	0.5
0.278966	0.011862	0.5
0.278966	0.01231	0.385542
0.278966	0.012759	0
0.278966	0.013207	0
0.278966	0.013655	0
0.278966	0.014103	0
0.278966	0.014552	0
0.278966	0.015	0
0.292414	0.002	1
0.292414	0.0024483	0.96
0.292414	0.0028966	0.941176
0.292414	0.0033448	0.916667
0.292414	0.0037931	0.888889
0.292414	0.0042414	0.875
0.292414	0.0046897	0.833333
0.292414	0.0051379	0.8
0.292414	0.0055862	0.8
0.292414	0.0060345	0.75
0.292414	0.0064828	0.75
0.292414	0.006931	0.666667
0.292414	0.0073793	0.666667
0.292414	0.0078276	0.666667
0.292414	0.0082759	0.5
0.292414	0.0087241	0.5
0.292414	0.0091724	0.5
0.292414	0.0096207	0.5
0.292414	0.010069	0.5
0.292414	0.010517	0.5
0.292414	0.010966	0.5
0.292414	0.011414	0.5
0.292414	0.011862	0.5
0.292414	0.01231	0.465116
0.292414	0.012759	0
0.292414	0.013207	0
0.292414	0.013655	0
0.292414	0.014103	0
0.292414	0.014552	0
0.292414	0.015	0
0.305862	0.002	1
0.305862	0.0024483	0.958333
0.305862	0.0028966	0.9375
0.305862	0.0033448	0.916667
0.305862	0.0037931	0.888889
0.305862	0.0042414	0.873418
0.305862	0.0046897	0.833333
0.305862	0.0051379	0.8
0.305862	0.0055862	0.8
0.305862	0.0060345	0.75
0.305862	0.0064828	0.75
0.305862	0.006931	0.666667
0.305862	0.0073793	0.666667
0.305862	0.0078276	0.666667
0.305862	0.0082759	0.5
0.305862	0.0087241	0.5
0.305862	0.0091724	0.5
0.305862	0.0096207	0.5
0.305862	0.010069	0.5
0.305862	0.010517	0.5
0.305862	0.010966	0.5
0.305862	0.011414	0.5
0.305862	0.011862	0.5
0.305862	0.01231	0.494505
0.305862	0.012759	0
0.305862	0.013207	0
0.305862	0.013655	0
0.305862	0.014103	0
0.305862	0.014552	0
0.305862	0.015	0
0.31931	0.002	0.974684
0.31931	0.0024483	0.958333
0.31931	0.0028966	0.9375
0.31931	0.0033448	0.916667
0.31931	0.0037931	0.888889
0.31931	0.0042414	0.857143
0.31931	0.0046897	0.833333
0.31931	0.0051379	0.8
0.31931	0.0055862	0.8
0.31931	0.0060345	0.75
0.31931	0.0064828	0.75
0.31931	0.006931	0.666667
0.31931	0.0073793	0.666667
0.31931	0.0078276	0.666667
0.31931	0.0082759	0.623656
0.31931	0.0087241	0.5
0.31931	0.0091724	0.5
0.31931	0.0096207	0.5
0.31931	0.010069	0.5
0.31931	0.010517	0.5
0.31931	0.010966	0.5
0.31931	0.011414	0.5
0.31931	0.011862	0.5
0.31931	0.01231	0.5
0.31931	0.012759	0
0.31931	0.013207	0
0.31931	0.013655	0
0.31931	0.014103	0
0.31931	0.014552	0
0.31931	0.015	0
0.332759	0.002	0.973684
0.332759	0.0024483	0.956522
0.332759	0.0028966	0.9375
0.332759	0.0033448	0.916667
0.332759	0.0037931	0.888889
0.332759	0.0042414	0.857143
0.332759	0.0046897	0.833333
0.332759	0.0051379	0.8
0.332759	0.0055862	0.8
0.332759	0.0060345	0.75
0.332759	0.0064828	0.75
0.332759	0.006931	0.666667
0.332759	0.0073793	0.666667
0.332759	0.0078276	0.666667
0.332759	0.0082759	0.645833
0.332759	0.0087241	0.5
0.332759	0.0091724	0.5
0.332759	0.0096207	0.5
0.332759	0.010069	0.5
0.332759	0.010517	0.5
0.332759	0.010966	0.5
0.332759	0.011414	0.5
0.332759	0.011862	0.5
0.332759	0.01231	0.5
0.332759	0.012759	0
0.332759	0.013207	0
0.332759	0.013655	0
0.332759	0.014103	0
0.332759	0.014552	0
0.332759	0.015	0
0.346207	0.002	0.972973
0.346207	0.0024483	0.956522
0.346207	0.0028966	0.9375
0.346207	0.0033448	0.916667
0.346207	0.0037931	0.888889
0.346207	0.0042414	0.857143
0.346207	0.0046897	0.833333
0.346207	0.0051379	0.8
0.346207	0.0055862	0.8
0.346207	0.0060345	0.75
0.346207	0.0064828	0.75
0.346207	0.006931	0.666667
0.346207	0.0073793	0.666667
0.346207	0.0078276	0.666667
0.346207	0.0082759	0.656863
0.346207	0.0087241	0.5
0.346207	0.0091724	0.5
0.346207	0.0096207	0.5
0.346207	0.010069	0.5
0.346207	0.010517	0.5
0.346207	0.010966	0.5
0.346207	0.011414	0.5
0.346207	0.011862	0.5
0.346207	0.01231	0.5
0.346207	0.012759	0
0.346207	0.013207	0
0.346207	0.013655	0
0.346207	0.014103	0
0.346207	0.014552	0
0.346207	0.015	0
0.359655	0.002	0.972973
0.359655	0.0024483	0.956522
0.359655	0.0028966	0.9375
0.359655	0.0033448	0.916667
0.359655	0.0037931	0.888889
0.359655	0.0042414	0.857143
0.359655	0.0046897	0.833333
0.359655	0.0051379	0.8
0.359655	0.0055862	0.8
0.359655	0.0060345	0.75
0.359655	0.0064828	0.75
0.359655	0.006931	0.666667
0.359655	0.0073793	0.666667
0.359655	0.0078276	0.666667
0.359655	0.0082759	0.666667
0.359655	0.0087241	0.5
0.359655	0.0091724	0.5
0.359655	0.0096207	0.5
0.359655	0.010069	0.5
0.359655	0.010517	0.5
0.359655	0.010966	0.5
0.359655	0.011414	0.5
0.359655	0.011862	0.5
0.359655	0.01231	0.5
0.359655	0.012759	0.327103
0.359655	0.013207	0
0.359655	0.013655	0
0.359655	0.014103	0
0.359655	0.014552	0
0.359655	0.015	0
0.373103	0.002	0.972222
0.373103	0.0024483	0.954545
0.373103	0.0028966	0.936842
0.373103	0.0033448	0.916667
0.373103	0.0037931	0.888889
0.373103	0.0042414	0.857143
0.373103	0.0046897	0.833333
0.373103	0.0051379	0.8
0.373103	0.0055862	0.8
0.373103	0.0060345	0.75
0.373103	0.0064828	0.75
0.373103	0.006931	0.666667
0.373103	0.0073793	0.666667
0.373103	0.0078276	0.666667
0.373103	0.0082759	0.666667
0.373103	0.0087241	0.5
0.373103	0.0091724	0.5
0.373103	0.0096207	0.5
0.373103	0.010069	0.5
0.373103	0.010517	0.5
0.373103	0.010966	0.5
0.373103	0.011414	0.5
0.373103	0.011862	0.5
0.373103	0.01231	0.5
0.373103	0.012759	0.436364
0.373103	0.013207	0
0.373103	0.013655	0
0.373103	0.014103	0
0.373103	0.014552	0
0.373103	0.015	0
0.386552	0.002	0.971429
0.386552	0.0024483	0.954545
0.386552	0.0028966	0.933333
0.386552	0.0033448	0.916667
0.386552	0.0037931	0.888889
0.386552	0.0042414	0.857143
0.386552	0.0046897	0.833333
0.386552	0.0051379	0.8
0.386552	0.0055862	0.8
0.386552	0.0060345	0.75
0.386552	0.0064828	0.75
0.386552	0.006931	0.666667
0.386552	0.0073793	0.666667
0.386552	0.0078276	0.666667
0.386552	0.0082759	0.666667
0.386552	0.0087241	0.5
0.386552	0.0091724	0.5
0.386552	0.0096207	0.5
0.386552	0.010069	0.5
0.386552	0.010517	0.5
0.386552	0.010966	0.5
0.386552	0.011414	0.5
0.386552	0.011862	0.5
0.386552	0.01231	0.5
0.386552	0.012759	0.473684
0.386552	0.013207	0
0.386552	0.013655	0
0.386552	0.014103	0
0.386552	0.014552	0
0.386552	0.015	0
0.4	0.002	0.971429
0.4	0.0024483	0.954545
0.4	0.0028966	0.933333
0.4	0.0033448	0.914286
0.4	0.0037931	0.888889
0.4	0.0042414	0.857143
0.4	0.0046897	0.833333
0.4	0.0051379	0.8
0.4	0.0055862	0.8
0.4	0.0060345	0.75
0.4	0.0064828	0.75
0.4	0.006931	0.666667
0.4	0.0073793	0.666667
0.4	0.0078276	0.666667
0.4	0.0082759	0.666667
0.4	0.0087241	0.5
0.4	0.0091724	0.5
0.4	0.0096207	0.5
0.4	0.010069	0.5
0.4	0.010517	0.5
0.4	0.010966	0.5
0.4	0.011414	0.5
0.4	0.011862	0.5
0.4	0.01231	0.5
0.4	0.012759	0.495798
0.4	0.013207	0
0.4	0.013655	0
0.4	0.014103	0
0.4	0.014552	0
0.4	0.015	0
