# Supplementary material for: Putting the theory into ‘burstlet theory’ with a biophysical model of burstlets and bursts in the respiratory preBötzinger complex
Source: eLife. 2022 Apr 5;11:e75713. doi: 10.7554/eLife.75713 (PMC9023056; doi:10.7554/eLife.75713)
Supplement: Figure 2—source data 1. [file elife-75713-fig2-data1.xlsx]

## Sheet: Sheet1
A3 and A4				B2-B4
IAPP (pA)	Burst Frequency	Spikes/Burst		IAPP	PsynCa	Burstlet Fraction	Burst Frequency	Spikes/Burst
0.75	NaN	NaN		3.7672	0	1	0	19
0.87069	NaN	NaN		3.7672	0.0041379	1	0	19
0.99138	NaN	NaN		3.7672	0.0082759	1	0	19
1.1121	NaN	NaN		3.7672	0.012414	0.977099	0.0114328	19
1.2328	0.0694149	36		3.7672	0.016552	0.946565	0.0209593	19
1.3534	0.0881382	35		3.7672	0.02069	0.923664	0.0314382	19
1.4741	0.101776	34		3.7672	0.024828	0.885496	0.047149	19
1.5948	0.114051	33		3.7672	0.028966	0.839695	0.0618304	19
1.7155	0.125807	32		3.7672	0.033103	0.801527	0.0754688	19
1.8362	0.137425	31		3.7672	0.037241	0.755725	0.0943438	19
1.9569	0.149136	30		3.7672	0.041379	0.755725	0.0943744	19
2.0776	0.161111	29		3.7672	0.045517	0.671756	0.125841	19
2.1983	0.173493	28		3.7672	0.049655	0.671756	0.125817	19
2.319	0.186409	27		3.7672	0.053793	0.671756	0.125847	19
2.4397	0.199987	26		3.7672	0.057931	0.503817	0.188845	19
2.5603	0.214336	25		3.7672	0.062069	0.503817	0.188833	19
2.681	0.229554	24		3.7672	0.066207	0.507576	0.188893	19
2.8017	0.238701	24		3.7672	0.070345	0.503817	0.188809	19
2.9224	0.256064	23		3.7672	0.074483	0.507576	0.188911	19
3.0431	0.274468	22		3.7672	0.078621	0.503817	0.188788	19
3.1638	0.294231	21		3.7672	0.082759	0.507576	0.188896	19
3.2845	0.305155	21		3.7672	0.086897	0.503817	0.188817	19
3.4052	0.328198	20		3.7672	0.091034	0.503817	0.188779	19
3.5259	0.337578	20		3.7672	0.095172	0.507576	0.188888	19
3.6466	0.366223	19		3.7672	0.09931	0	0.377936	19
3.7672	0.377199	19		3.7672	0.10345	0	0.378172	19
3.8879	0.409436	18		3.7672	0.10759	0	0.377243	19
4.0086	0.423208	18		3.7672	0.11172	0	0.377895	19
4.1293	NaN	NaN		3.7672	0.11586	0	0.378356	19
4.25	NaN	NaN		3.7672	0.12	0	0.377576	19
				3.6466	0	1	0	19
				3.6466	0.0041379	1	0	19
				3.6466	0.0082759	1	0	19
				3.6466	0.012414	0.976378	0.0107711	19
				3.6466	0.016552	0.944882	0.0203472	19
				3.6466	0.02069	0.92126	0.0305201	19
				3.6466	0.024828	0.874016	0.0457857	19
				3.6466	0.028966	0.834646	0.061047	19
				3.6466	0.033103	0.80315	0.0732534	19
				3.6466	0.037241	0.755906	0.0915685	19
				3.6466	0.041379	0.755906	0.0915694	19
				3.6466	0.045517	0.669291	0.122092	19
				3.6466	0.049655	0.669291	0.122099	19
				3.6466	0.053793	0.669291	0.122095	19
				3.6466	0.057931	0.503937	0.183152	19
				3.6466	0.062069	0.503937	0.183162	19
				3.6466	0.066207	0.503937	0.183145	19
				3.6466	0.070345	0.496063	0.183191	19
				3.6466	0.074483	0.496063	0.18314	19
				3.6466	0.078621	0.496063	0.18317	19
				3.6466	0.082759	0.496063	0.183153	19
				3.6466	0.086897	0.496063	0.183175	19
				3.6466	0.091034	0.496063	0.183183	19
				3.6466	0.095172	0.409449	0.215193	19
				3.6466	0.09931	0	0.366345	19
				3.6466	0.10345	0	0.366471	19
				3.6466	0.10759	0	0.366376	19
				3.6466	0.11172	0	0.366487	19
				3.6466	0.11586	0	0.366481	19
				3.6466	0.12	0	0.366318	19
				3.5259	0	1	0	20
				3.5259	0.0041379	1	0	20
				3.5259	0.0082759	1	0	20
				3.5259	0.012414	0.974359	0.0105502	20
				3.5259	0.016552	0.948718	0.0198628	20
				3.5259	0.02069	0.915254	0.0306999	20
				3.5259	0.024828	0.889831	0.0422181	20
				3.5259	0.028966	0.838983	0.0562938	20
				3.5259	0.033103	0.805085	0.0675768	20
				3.5259	0.037241	0.762712	0.0844518	20
				3.5259	0.041379	0.669492	0.112675	20
				3.5259	0.045517	0.669492	0.11269	20
				3.5259	0.049655	0.669492	0.11269	20
				3.5259	0.053793	0.508475	0.169167	20
				3.5259	0.057931	0.508475	0.169013	20
				3.5259	0.062069	0.508475	0.169112	20
				3.5259	0.066207	0.508475	0.169143	20
				3.5259	0.070345	0.508475	0.16906	20
				3.5259	0.074483	0.508475	0.169151	20
				3.5259	0.078621	0.508475	0.169057	20
				3.5259	0.082759	0.508475	0.169106	20
				3.5259	0.086897	0.508475	0.169195	20
				3.5259	0.091034	0	0.338331	20
				3.5259	0.095172	0	0.334562	20.1913
				3.5259	0.09931	0	0.338663	20
				3.5259	0.10345	0	0.338973	20
				3.5259	0.10759	0	0.338288	20
				3.5259	0.11172	0	0.338703	20
				3.5259	0.11586	0	0.33916	20
				3.5259	0.12	0	0.338435	20
				3.4052	0	1	0	20
				3.4052	0.0041379	1	0	20
				3.4052	0.0082759	1	0	20
				3.4052	0.012414	0.973684	0.0102563	20
				3.4052	0.016552	0.947368	0.019307	20
				3.4052	0.02069	0.921053	0.0298381	20
				3.4052	0.024828	0.885965	0.0410271	20
				3.4052	0.028966	0.842105	0.0547046	20
				3.4052	0.033103	0.807018	0.0656449	20
				3.4052	0.037241	0.763158	0.0820592	20
				3.4052	0.041379	0.675439	0.109417	20
				3.4052	0.045517	0.675439	0.109411	20
				3.4052	0.049655	0.675439	0.109411	20
				3.4052	0.053793	0.508772	0.164137	20
				3.4052	0.057931	0.508772	0.164129	20
				3.4052	0.062069	0.508772	0.164148	20
				3.4052	0.066207	0.508772	0.164129	20
				3.4052	0.070345	0.508772	0.164144	20
				3.4052	0.074483	0.508772	0.164138	20
				3.4052	0.078621	0.508772	0.164118	20
				3.4052	0.082759	0.508772	0.164142	20
				3.4052	0.086897	0.464912	0.174363	20
				3.4052	0.091034	0	0.328358	20
				3.4052	0.095172	0	0.328349	20
				3.4052	0.09931	0	0.328291	20
				3.4052	0.10345	0	0.328356	20
				3.4052	0.10759	0	0.328312	20
				3.4052	0.11172	0	0.328408	20
				3.4052	0.11586	0	0.328403	20
				3.4052	0.12	0	0.328326	20
				3.2845	0	1	0	21
				3.2845	0.0041379	1	0	21
				3.2845	0.0082759	1	0	21
				3.2845	0.012414	0.980952	0	21
				3.2845	0.016552	0.942857	0.0190749	21
				3.2845	0.02069	0.914286	0.0305217	21
				3.2845	0.024828	0.857143	0.0436065	21
				3.2845	0.028966	0.838095	0.0508663	21
				3.2845	0.033103	0.771429	0.0716018	21
				3.2845	0.037241	0.754717	0.0763053	21
				3.2845	0.041379	0.679245	0.101749	21
				3.2845	0.045517	0.679245	0.101738	21
				3.2845	0.049655	0.679245	0.101735	21
				3.2845	0.053793	0.509434	0.152626	21
				3.2845	0.057931	0.509434	0.152635	21
				3.2845	0.062069	0.5	0.152634	21
				3.2845	0.066207	0.509434	0.152616	21
				3.2845	0.070345	0.5	0.152647	21
				3.2845	0.074483	0.5	0.152645	21
				3.2845	0.078621	0.509434	0.152615	21
				3.2845	0.082759	0.5	0.15263	21
				3.2845	0.086897	0	0.305341	21
				3.2845	0.091034	0	0.305346	21
				3.2845	0.095172	0	0.305407	21
				3.2845	0.09931	0	0.305291	21
				3.2845	0.10345	0	0.305364	21
				3.2845	0.10759	0	0.305395	21
				3.2845	0.11172	0	0.305318	21
				3.2845	0.11586	0	0.305382	21
				3.2845	0.12	0	0.305396	21
				3.1638	0	1	0	21
				3.1638	0.0041379	1	0	21
				3.1638	0.0082759	1	0	21
				3.1638	0.012414	0.980392	0	21
				3.1638	0.016552	0.941176	0.0183917	21
				3.1638	0.02069	0.911765	0.0294259	21
				3.1638	0.024828	0.862745	0.0420381	21
				3.1638	0.028966	0.843137	0.0490399	21
				3.1638	0.033103	0.754902	0.0735445	21
				3.1638	0.037241	0.754902	0.0735633	21
				3.1638	0.041379	0.666667	0.0980855	21
				3.1638	0.045517	0.666667	0.0980815	21
				3.1638	0.049655	0.5	0.147165	21
				3.1638	0.053793	0.509804	0.14713	21
				3.1638	0.057931	0.509804	0.147132	21
				3.1638	0.062069	0.509804	0.147145	21
				3.1638	0.066207	0.509804	0.147122	21
				3.1638	0.070345	0.509804	0.147136	21
				3.1638	0.074483	0.509804	0.147144	21
				3.1638	0.078621	0.509804	0.14712	21
				3.1638	0.082759	0	0.294191	21
				3.1638	0.086897	0	0.294351	21
				3.1638	0.091034	0	0.294298	21
				3.1638	0.095172	0	0.294375	21
				3.1638	0.09931	0	0.294255	21
				3.1638	0.10345	0	0.294338	21
				3.1638	0.10759	0	0.294336	21
				3.1638	0.11172	0	0.294276	21
				3.1638	0.11586	0	0.294197	21
				3.1638	0.12	0	0.294322	21
				3.0431	0	1	0	22
				3.0431	0.0041379	1	0	22
				3.0431	0.0082759	1	0	22
				3.0431	0.012414	0.978947	0	22
				3.0431	0.016552	0.947368	0.017155	22
				3.0431	0.02069	0.915789	0.0274485	22
				3.0431	0.024828	0.863158	0.0392132	22
				3.0431	0.028966	0.810526	0.0549014	22
				3.0431	0.033103	0.757895	0.0686257	22
				3.0431	0.037241	0.757895	0.0686271	22
				3.0431	0.041379	0.673684	0.0915026	22
				3.0431	0.045517	0.673684	0.0914976	22
				3.0431	0.049655	0.505263	0.13727	22
				3.0431	0.053793	0.505263	0.137258	22
				3.0431	0.057931	0.505263	0.137254	22
				3.0431	0.062069	0.505263	0.137274	22
				3.0431	0.066207	0.505263	0.137256	22
				3.0431	0.070345	0.505263	0.137256	22
				3.0431	0.074483	0.505263	0.137272	22
				3.0431	0.078621	0.505263	0.137273	22
				3.0431	0.082759	0	0.274554	22
				3.0431	0.086897	0	0.274624	22
				3.0431	0.091034	0	0.274576	22
				3.0431	0.095172	0	0.27458	22
				3.0431	0.09931	0	0.274598	22
				3.0431	0.10345	0	0.274575	22
				3.0431	0.10759	0	0.274614	22
				3.0431	0.11172	0	0.274593	22
				3.0431	0.11586	0	0.274581	22
				3.0431	0.12	0	0.274538	22
				2.9224	0	1	0	23
				2.9224	0.0041379	1	0	23
				2.9224	0.0082759	1	0	23
				2.9224	0.012414	0.977528	0	23
				2.9224	0.016552	0.94382	0.0170634	23
				2.9224	0.02069	0.910112	0.0256076	23
				2.9224	0.024828	0.865169	0.0365835	23
				2.9224	0.028966	0.808989	0.0512198	23
				2.9224	0.033103	0.764045	0.0640258	23
				2.9224	0.037241	0.685393	0.0853788	23
				2.9224	0.041379	0.674157	0.0853656	23
				2.9224	0.045517	0.674157	0.085364	23
				2.9224	0.049655	0.505618	0.128056	23
				2.9224	0.053793	0.505618	0.128057	23
				2.9224	0.057931	0.505618	0.128057	23
				2.9224	0.062069	0.505618	0.128071	23
				2.9224	0.066207	0.505618	0.128072	23
				2.9224	0.070345	0.505618	0.128055	23
				2.9224	0.074483	0.505618	0.128072	23
				2.9224	0.078621	0	0.256183	23
				2.9224	0.082759	0	0.256159	23
				2.9224	0.086897	0	0.256189	23
				2.9224	0.091034	0	0.256235	23
				2.9224	0.095172	0	0.256176	23
				2.9224	0.09931	0	0.256147	23
				2.9224	0.10345	0	0.256219	23
				2.9224	0.10759	0	0.25621	23
				2.9224	0.11172	0	0.256191	23
				2.9224	0.11586	0	0.256205	23
				2.9224	0.12	0	0.256208	23
				2.8017	0	1	0	24
				2.8017	0.0041379	1	0	24
				2.8017	0.0082759	1	0	24
				2.8017	0.012414	0.975904	0	24
				2.8017	0.016552	0.939759	0.015915	24
				2.8017	0.02069	0.903614	0.0265337	24
				2.8017	0.024828	0.86747	0.0341045	24
				2.8017	0.028966	0.807229	0.0477501	24
				2.8017	0.033103	0.759036	0.0596946	24
				2.8017	0.037241	0.674699	0.0796009	24
				2.8017	0.041379	0.674699	0.079599	24
				2.8017	0.045517	0.542169	0.111812	24
				2.8017	0.049655	0.506024	0.119408	24
				2.8017	0.053793	0.506024	0.119425	24
				2.8017	0.057931	0.506024	0.119418	24
				2.8017	0.062069	0.506024	0.119406	24
				2.8017	0.066207	0.506024	0.119425	24
				2.8017	0.070345	0.506024	0.119418	24
				2.8017	0.074483	0	0.238934	24
				2.8017	0.078621	0	0.23879	24
				2.8017	0.082759	0	0.238953	24
				2.8017	0.086897	0	0.238806	24
				2.8017	0.091034	0	0.238912	24
				2.8017	0.095172	0	0.239031	24
				2.8017	0.09931	0	0.238917	24
				2.8017	0.10345	0	0.238897	24
				2.8017	0.10759	0	0.238966	24
				2.8017	0.11172	0	0.239027	24
				2.8017	0.11586	0	0.238937	24
				2.8017	0.12	0	0.238918	24
				2.681	0	1	0	24
				2.681	0.0041379	1	0	24
				2.681	0.0082759	1	0	24
				2.681	0.012414	0.987342	0	24
				2.681	0.016552	0.949367	0.0143469	24
				2.681	0.02069	0.911392	0.0229559	24
				2.681	0.024828	0.860759	0.0327946	24
				2.681	0.028966	0.810127	0.0459129	24
				2.681	0.033103	0.759494	0.05739	24
				2.681	0.037241	0.670886	0.0765245	24
				2.681	0.041379	0.670886	0.0765262	24
				2.681	0.045517	0.518987	0.111728	24
				2.681	0.049655	0.506329	0.114796	24
				2.681	0.053793	0.506329	0.11479	24
				2.681	0.057931	0.506329	0.114781	24
				2.681	0.062069	0.506329	0.114795	24
				2.681	0.066207	0.506329	0.114776	24
				2.681	0.070345	0.506329	0.11479	24
				2.681	0.074483	0	0.229637	24
				2.681	0.078621	0	0.229639	24
				2.681	0.082759	0	0.229602	24
				2.681	0.086897	0	0.229637	24
				2.681	0.091034	0	0.229629	24
				2.681	0.095172	0	0.229536	24
				2.681	0.09931	0	0.229621	24
				2.681	0.10345	0	0.229594	24
				2.681	0.10759	0	0.229573	24
				2.681	0.11172	0	0.229598	24
				2.681	0.11586	0	0.22962	24
				2.681	0.12	0	0.229613	24
				2.5603	0	1	0	25
				2.5603	0.0041379	1	0	25
				2.5603	0.0082759	1	0	25
				2.5603	0.012414	0.986486	0	25
				2.5603	0.016552	0.945946	0.0142907	25
				2.5603	0.02069	0.905405	0.0238176	25
				2.5603	0.024828	0.864865	0.0306211	25
				2.5603	0.028966	0.810811	0.0428711	25
				2.5603	0.033103	0.756757	0.0535879	25
				2.5603	0.037241	0.675676	0.0714527	25
				2.5603	0.041379	0.675676	0.0714543	25
				2.5603	0.045517	0.5	0.10719	25
				2.5603	0.049655	0.513514	0.107187	25
				2.5603	0.053793	0.513514	0.107186	25
				2.5603	0.057931	0.513514	0.107184	25
				2.5603	0.062069	0.513514	0.107182	25
				2.5603	0.066207	0.513514	0.107188	25
				2.5603	0.070345	0.513514	0.107183	25
				2.5603	0.074483	0	0.21441	25
				2.5603	0.078621	0	0.214408	25
				2.5603	0.082759	0	0.214418	25
				2.5603	0.086897	0	0.214401	25
				2.5603	0.091034	0	0.214378	25
				2.5603	0.095172	0	0.214415	25
				2.5603	0.09931	0	0.214403	25
				2.5603	0.10345	0	0.214382	25
				2.5603	0.10759	0	0.214404	25
				2.5603	0.11172	0	0.214412	25
				2.5603	0.11586	0	0.214391	25
				2.5603	0.12	0	0.214374	25
				2.4397	0	1	0	26
				2.4397	0.0041379	1	0	26
				2.4397	0.0082759	1	0	26
				2.4397	0.012414	0.985507	0	26
				2.4397	0.016552	0.942029	0.0133335	26
				2.4397	0.02069	0.898551	0.0222235	26
				2.4397	0.024828	0.855072	0.0333243	26
				2.4397	0.028966	0.811594	0.0400014	26
				2.4397	0.033103	0.768116	0.0499998	26
				2.4397	0.037241	0.681159	0.0666713	26
				2.4397	0.041379	0.681159	0.0666681	26
				2.4397	0.045517	0.507246	0.100015	26
				2.4397	0.049655	0.507246	0.100005	26
				2.4397	0.053793	0.507246	0.100007	26
				2.4397	0.057931	0.507246	0.100012	26
				2.4397	0.062069	0.507246	0.100009	26
				2.4397	0.066207	0.507246	0.100009	26
				2.4397	0.070345	0.0434783	0.194046	26
				2.4397	0.074483	0	0.200046	26
				2.4397	0.078621	0	0.200061	26
				2.4397	0.082759	0	0.200049	26
				2.4397	0.086897	0	0.200058	26
				2.4397	0.091034	0	0.200067	26
				2.4397	0.095172	0	0.200054	26
				2.4397	0.09931	0	0.200026	26
				2.4397	0.10345	0	0.200057	26
				2.4397	0.10759	0	0.200051	26
				2.4397	0.11172	0	0.200052	26
				2.4397	0.11586	0	0.200056	26
				2.4397	0.12	0	0.200057	26
				2.319	0	1	0	27
				2.319	0.0041379	1	0	27
				2.319	0.0082759	1	0	27
				2.319	0.012414	0.984375	0	27
				2.319	0.016552	0.953125	0.0116508	27
				2.319	0.02069	0.890625	0.0207139	27
				2.319	0.024828	0.84375	0.0310721	27
				2.319	0.028966	0.8125	0.0372846	27
				2.319	0.033103	0.765625	0.0466063	27
				2.319	0.037241	0.6875	0.0621436	27
				2.319	0.041379	0.6875	0.0621437	27
				2.319	0.045517	0.5	0.0932186	27
				2.319	0.049655	0.5	0.0932224	27
				2.319	0.053793	0.5	0.093218	27
				2.319	0.057931	0.5	0.0932187	27
				2.319	0.062069	0.5	0.0932204	27
				2.319	0.066207	0.5	0.0932217	27
				2.319	0.070345	0	0.186458	27
				2.319	0.074483	0	0.186485	27
				2.319	0.078621	0	0.186459	27
				2.319	0.082759	0	0.186483	27
				2.319	0.086897	0	0.186466	27
				2.319	0.091034	0	0.186464	27
				2.319	0.095172	0	0.186467	27
				2.319	0.09931	0	0.186477	27
				2.319	0.10345	0	0.186474	27
				2.319	0.10759	0	0.186467	27
				2.319	0.11172	0	0.186466	27
				2.319	0.11586	0	0.186476	27
				2.319	0.12	0	0.186475	27
				2.1983	0	1	0	28
				2.1983	0.0041379	1	0	28
				2.1983	0.0082759	1	0	28
				2.1983	0.012414	1	0	28
				2.1983	0.016552	0.95	0.0108435	28
				2.1983	0.02069	0.9	0.0192785	28
				2.1983	0.024828	0.85	0.0289186	28
				2.1983	0.028966	0.816667	0.0347006	28
				2.1983	0.033103	0.766667	0.0433763	28
				2.1983	0.037241	0.666667	0.0578382	28
				2.1983	0.041379	0.666667	0.057837	28
				2.1983	0.045517	0.516667	0.0867612	28
				2.1983	0.049655	0.516667	0.0867611	28
				2.1983	0.053793	0.516667	0.086761	28
				2.1983	0.057931	0.516667	0.0867589	28
				2.1983	0.062069	0.516667	0.0867618	28
				2.1983	0.066207	0.516667	0.0867588	28
				2.1983	0.070345	0	0.173548	28
				2.1983	0.074483	0	0.173546	28
				2.1983	0.078621	0	0.173546	28
				2.1983	0.082759	0	0.173565	28
				2.1983	0.086897	0	0.173535	28
				2.1983	0.091034	0	0.173552	28
				2.1983	0.095172	0	0.173557	28
				2.1983	0.09931	0	0.17355	28
				2.1983	0.10345	0	0.173533	28
				2.1983	0.10759	0	0.173541	28
				2.1983	0.11172	0	0.173556	28
				2.1983	0.11586	0	0.173551	28
				2.1983	0.12	0	0.173549	28
				2.0776	0	1	0	29
				2.0776	0.0041379	1	0	29
				2.0776	0.0082759	1	0	29
				2.0776	0.012414	1	0	29
				2.0776	0.016552	0.946429	0.0100696	29
				2.0776	0.02069	0.892857	0.0179026	29
				2.0776	0.024828	0.857143	0.026854	29
				2.0776	0.028966	0.821429	0.0322244	29
				2.0776	0.033103	0.75	0.040281	29
				2.0776	0.037241	0.678571	0.0537092	29
				2.0776	0.041379	0.678571	0.0537096	29
				2.0776	0.045517	0.5	0.0805704	29
				2.0776	0.049655	0.5	0.0805696	29
				2.0776	0.053793	0.5	0.080568	29
				2.0776	0.057931	0.5	0.0805682	29
				2.0776	0.062069	0.5	0.0805682	29
				2.0776	0.066207	0.5	0.0805668	29
				2.0776	0.070345	0	0.161162	29
				2.0776	0.074483	0	0.161158	29
				2.0776	0.078621	0	0.161159	29
				2.0776	0.082759	0	0.161157	29
				2.0776	0.086897	0	0.161156	29
				2.0776	0.091034	0	0.16117	29
				2.0776	0.095172	0	0.161165	29
				2.0776	0.09931	0	0.161154	29
				2.0776	0.10345	0	0.161151	29
				2.0776	0.10759	0	0.161161	29
				2.0776	0.11172	0	0.161165	29
				2.0776	0.11586	0	0.161163	29
				2.0776	0.12	0	0.161157	29
				1.9569	0	1	0	30
				1.9569	0.0041379	1	0	30
				1.9569	0.0082759	1	0	30
				1.9569	0.012414	1	0	30
				1.9569	0.016552	0.960784	0	30
				1.9569	0.02069	0.901961	0.0165732	30
				1.9569	0.024828	0.862745	0.0248582	30
				1.9569	0.028966	0.823529	0.0298289	30
				1.9569	0.033103	0.764706	0.0372865	30
				1.9569	0.037241	0.686275	0.0497172	30
				1.9569	0.041379	0.686275	0.0497168	30
				1.9569	0.045517	0.509804	0.0745804	30
				1.9569	0.049655	0.509804	0.0745798	30
				1.9569	0.053793	0.509804	0.0745794	30
				1.9569	0.057931	0.509804	0.074578	30
				1.9569	0.062069	0.509804	0.0745786	30
				1.9569	0.066207	0.0392157	0.146101	30
				1.9569	0.070345	0	0.149177	30
				1.9569	0.074483	0	0.149179	30
				1.9569	0.078621	0	0.149179	30
				1.9569	0.082759	0	0.149179	30
				1.9569	0.086897	0	0.149178	30
				1.9569	0.091034	0	0.149181	30
				1.9569	0.095172	0	0.149177	30
				1.9569	0.09931	0	0.149179	30
				1.9569	0.10345	0	0.149175	30
				1.9569	0.10759	0	0.149182	30
				1.9569	0.11172	0	0.149173	30
				1.9569	0.11586	0	0.14917	30
				1.9569	0.12	0	0.14918	30
				1.8362	0	1	0	31
				1.8362	0.0041379	1	0	31
				1.8362	0.0082759	1	0	31
				1.8362	0.012414	1	0	31
				1.8362	0.016552	0.957447	0	31
				1.8362	0.02069	0.914894	0.0137429	31
				1.8362	0.024828	0.851064	0.0229075	31
				1.8362	0.028966	0.829787	0.0274862	31
				1.8362	0.033103	0.765957	0.0343584	31
				1.8362	0.037241	0.680851	0.0458125	31
				1.8362	0.041379	0.680851	0.0458116	31
				1.8362	0.045517	0.510638	0.0687212	31
				1.8362	0.049655	0.510638	0.0687207	31
				1.8362	0.053793	0.510638	0.0687222	31
				1.8362	0.057931	0.510638	0.0687195	31
				1.8362	0.062069	0.510638	0.0687211	31
				1.8362	0.066207	0.0212766	0.137478	31
				1.8362	0.070345	0	0.137462	31
				1.8362	0.074483	0	0.13746	31
				1.8362	0.078621	0	0.13746	31
				1.8362	0.082759	0	0.13746	31
				1.8362	0.086897	0	0.137463	31
				1.8362	0.091034	0	0.137449	31
				1.8362	0.095172	0	0.137461	31
				1.8362	0.09931	0	0.137461	31
				1.8362	0.10345	0	0.137465	31
				1.8362	0.10759	0	0.137455	31
				1.8362	0.11172	0	0.137451	31
				1.8362	0.11586	0	0.137454	31
				1.8362	0.12	0	0.137465	31
				1.7155	0	1	0	32
				1.7155	0.0041379	1	0	32
				1.7155	0.0082759	1	0	32
				1.7155	0.012414	1	0	32
				1.7155	0.016552	0.976744	0	32
				1.7155	0.02069	0.906977	0.0125809	32
				1.7155	0.024828	0.837209	0.0209622	32
				1.7155	0.028966	0.813953	0.0251626	32
				1.7155	0.033103	0.767442	0.0314538	32
				1.7155	0.037241	0.697674	0.0419391	32
				1.7155	0.041379	0.697674	0.0419383	32
				1.7155	0.045517	0.511628	0.0629088	32
				1.7155	0.049655	0.511628	0.0629108	32
				1.7155	0.053793	0.511628	0.0629112	32
				1.7155	0.057931	0.511628	0.0629098	32
				1.7155	0.062069	0.511628	0.0629116	32
				1.7155	0.066207	0	0.125834	32
				1.7155	0.070345	0	0.125838	32
				1.7155	0.074483	0	0.125835	32
				1.7155	0.078621	0	0.125834	32
				1.7155	0.082759	0	0.125833	32
				1.7155	0.086897	0	0.125839	32
				1.7155	0.091034	0	0.125826	32
				1.7155	0.095172	0	0.125834	32
				1.7155	0.09931	0	0.125838	32
				1.7155	0.10345	0	0.125837	32
				1.7155	0.10759	0	0.12583	32
				1.7155	0.11172	0	0.125829	32
				1.7155	0.11586	0	0.125834	32
				1.7155	0.12	0	0.125838	32
				1.5948	0	1	0	33
				1.5948	0.0041379	1	0	33
				1.5948	0.0082759	1	0	33
				1.5948	0.012414	1	0	33
				1.5948	0.016552	0.974359	0	33
				1.5948	0.02069	0.923077	0.0114051	33
				1.5948	0.024828	0.871795	0.0162935	33
				1.5948	0.028966	0.820513	0.0228111	33
				1.5948	0.033103	0.769231	0.0285143	33
				1.5948	0.037241	0.666667	0.0380201	33
				1.5948	0.041379	0.666667	0.0380196	33
				1.5948	0.045517	0.512821	0.0570317	33
				1.5948	0.049655	0.512821	0.0570305	33
				1.5948	0.053793	0.512821	0.0570317	33
				1.5948	0.057931	0.512821	0.0570306	33
				1.5948	0.062069	0.512821	0.0570321	33
				1.5948	0.066207	0	0.114074	33
				1.5948	0.070345	0	0.114077	33
				1.5948	0.074483	0	0.114073	33
				1.5948	0.078621	0	0.114074	33
				1.5948	0.082759	0	0.114072	33
				1.5948	0.086897	0	0.114079	33
				1.5948	0.091034	0	0.114069	33
				1.5948	0.095172	0	0.114073	33
				1.5948	0.09931	0	0.114073	33
				1.5948	0.10345	0	0.114076	33
				1.5948	0.10759	0	0.114072	33
				1.5948	0.11172	0	0.114069	33
				1.5948	0.11586	0	0.114072	33
				1.5948	0.12	0	0.114073	33
				1.4741	0	1	0	34
				1.4741	0.0041379	1	0	34
				1.4741	0.0082759	1	0	34
				1.4741	0.012414	1	0	34
				1.4741	0.016552	1	0	34
				1.4741	0.02069	0.941176	0	34
				1.4741	0.024828	0.882353	0.0145397	34
				1.4741	0.028966	0.823529	0.020356	34
				1.4741	0.033103	0.764706	0.025445	34
				1.4741	0.037241	0.676471	0.0339273	34
				1.4741	0.041379	0.676471	0.0339274	34
				1.4741	0.045517	0.5	0.0508934	34
				1.4741	0.049655	0.5	0.0508929	34
				1.4741	0.053793	0.5	0.0508926	34
				1.4741	0.057931	0.5	0.0508921	34
				1.4741	0.062069	0.5	0.0508918	34
				1.4741	0.066207	0	0.101794	34
				1.4741	0.070345	0	0.101795	34
				1.4741	0.074483	0	0.101791	34
				1.4741	0.078621	0	0.101795	34
				1.4741	0.082759	0	0.101787	34
				1.4741	0.086897	0	0.101795	34
				1.4741	0.091034	0	0.101792	34
				1.4741	0.095172	0	0.101792	34
				1.4741	0.09931	0	0.101787	34
				1.4741	0.10345	0	0.101794	34
				1.4741	0.10759	0	0.101794	34
				1.4741	0.11172	0	0.101789	34
				1.4741	0.11586	0	0.101792	34
				1.4741	0.12	0	0.10179	34
				1.3534	0	1	0	35
				1.3534	0.0041379	1	0	35
				1.3534	0.0082759	1	0	35
				1.3534	0.012414	1	0	35
				1.3534	0.016552	1	0	35
				1.3534	0.02069	0.966667	0	35
				1.3534	0.024828	0.866667	0.0125912	35
				1.3534	0.028966	0.8	0.0176279	35
				1.3534	0.033103	0.8	0.0220351	35
				1.3534	0.037241	0.7	0.0293808	35
				1.3534	0.041379	0.7	0.0293801	35
				1.3534	0.045517	0.533333	0.0440721	35
				1.3534	0.049655	0.533333	0.0440718	35
				1.3534	0.053793	0.533333	0.0440716	35
				1.3534	0.057931	0.533333	0.044071	35
				1.3534	0.062069	0.533333	0.0440708	35
				1.3534	0.066207	0	0.0881507	35
				1.3534	0.070345	0	0.0881479	35
				1.3534	0.074483	0	0.0881477	35
				1.3534	0.078621	0	0.0881497	35
				1.3534	0.082759	0	0.0881441	35
				1.3534	0.086897	0	0.0881486	35
				1.3534	0.091034	0	0.0881485	35
				1.3534	0.095172	0	0.0881485	35
				1.3534	0.09931	0	0.0881374	35
				1.3534	0.10345	0	0.088148	35
				1.3534	0.10759	0	0.0881482	35
				1.3534	0.11172	0	0.0881416	35
				1.3534	0.11586	0	0.0881464	35
				1.3534	0.12	0	0.088145	35
