# Supplementary material for: Putting the theory into ‘burstlet theory’ with a biophysical model of burstlets and bursts in the respiratory preBötzinger complex
Source: eLife. 2022 Apr 5;11:e75713. doi: 10.7554/eLife.75713 (PMC9023056; doi:10.7554/eLife.75713)
Supplement: Figure 3—source data 1. [file elife-75713-fig3-data1.xlsx]

## Sheet: Sheet1
	GNap=5						GNap=4						GNap=3
Kbath	gLeak	Dynamics (1=silent;2=bursting3=tonic)				Kbath	gLeak	Dynamics (1=silent;2=bursting3=tonic)				Kbath	gLeak	Dynamics (1=silent;2=bursting3=tonic)
4	0	1				4	0	1				4	0	1
4	0.62069	1				4	0.62069	1				4	0.62069	1
4.5172	0.78765	1				4.5172	0.78765	1				4.5172	0.78765	1
4.5172	0.85661	1				4.5172	0.85661	1				4.5172	0.85661	1
4.5172	0.92558	1				4.5172	0.92558	1				4.5172	0.92558	1
4.5172	0.99454	1				4.5172	0.99454	1				4.5172	0.99454	1
4.5172	1.0635	1				4.5172	1.0635	1				4.5172	1.0635	1
4.5172	1.1325	1				4.5172	1.1325	1				4.5172	1.1325	1
4.5172	1.2014	1				4.5172	1.2014	1				4.5172	1.2014	1
4.5172	1.2704	1				4.5172	1.2704	1				4.5172	1.2704	1
4.5172	1.3394	2				4.5172	1.3394	1				4.5172	1.3394	1
4.5172	1.4083	1				4.5172	1.4083	1				4.5172	1.4083	1
4	0.68966	1				4	0.68966	1				4	0.68966	1
4.5172	1.4773	1				4.5172	1.4773	1				4	0.75862	1
4.5172	1.5463	1				4.5172	1.5463	1				4.6897	0.22859	1
4.5172	1.6152	1				4	0.75862	1				4.6897	0.29756	1
4.5172	1.6842	1				4.6897	0.22859	1				4.6897	0.36652	1
4	0.75862	1				4.6897	0.29756	1				4.6897	0.43549	1
4.6897	0.22859	1				4.6897	0.36652	1				4.6897	0.50445	1
4.6897	0.29756	1				4.6897	0.43549	1				4.6897	0.57342	1
4.6897	0.36652	1				4.6897	0.50445	1				4.6897	0.64238	1
4.6897	0.43549	1				4.6897	0.57342	1				4.6897	0.71135	1
4.6897	0.50445	1				4.6897	0.64238	1				4.6897	0.78031	1
4.6897	0.57342	1				4.6897	0.71135	1				4	0.82759	1
4.6897	0.64238	1				4.6897	0.78031	1				4.6897	0.84928	1
4.6897	0.71135	1				4	0.82759	1				4.6897	0.91825	1
4.6897	0.78031	1				4.6897	0.84928	1				4.6897	0.98721	1
4	0.82759	1				4.6897	0.91825	1				4.6897	1.0562	1
4.6897	0.84928	1				4.6897	0.98721	1				4.6897	1.1251	1
4.6897	0.91825	1				4.6897	1.0562	1				4.6897	1.1941	1
4.6897	0.98721	1				4.6897	1.1251	1				4.6897	1.2631	1
4.6897	1.0562	1				4.6897	1.1941	1				4.6897	1.332	1
4.6897	1.1251	1				4.6897	1.2631	1				4.6897	1.401	1
4.6897	1.1941	1				4.6897	1.332	1				4.6897	1.47	1
4.6897	1.2631	1				4.6897	1.401	1				4	0.89655	1
4.6897	1.332	1				4.6897	1.47	1				4	0.96552	1
4.6897	1.401	2				4	0.89655	1				4.8621	0.29348	1
4.6897	1.47	1				4.6897	1.5389	1				4.8621	0.36244	1
4	0.89655	1				4.6897	1.6079	1				4.8621	0.43141	1
4.6897	1.5389	1				4	0.96552	1				4.8621	0.50037	1
4.6897	1.6079	1				4.8621	0.29348	1				4.8621	0.56934	1
4.6897	1.6769	1				4.8621	0.36244	1				4.8621	0.6383	1
4	0.96552	1				4.8621	0.43141	1				4.8621	0.70727	1
4.8621	0.29348	1				4.8621	0.50037	1				4.8621	0.77624	1
4.8621	0.36244	1				4.8621	0.56934	1				4.8621	0.8452	1
4.8621	0.43141	1				4.8621	0.6383	1				4	1.0345	1
4.8621	0.50037	1				4.8621	0.70727	1				4.8621	0.91417	1
4.8621	0.56934	1				4.8621	0.77624	1				4.8621	0.98313	1
4.8621	0.6383	1				4.8621	0.8452	1				4.8621	1.0521	1
4.8621	0.70727	1				4	1.0345	1				4.8621	1.1211	1
4.8621	0.77624	1				4.8621	0.91417	1				4.8621	1.19	1
4.8621	0.8452	1				4.8621	0.98313	1				4.8621	1.259	1
4	1.0345	1				4.8621	1.0521	1				4.8621	1.328	1
4.8621	0.91417	1				4.8621	1.1211	1				4.8621	1.3969	1
4.8621	0.98313	1				4.8621	1.19	1				4.8621	1.4659	1
4.8621	1.0521	1				4.8621	1.259	1				4	1.1034	1
4.8621	1.1211	1				4.8621	1.328	1				4	1.1724	1
4.8621	1.19	1				4.8621	1.3969	2				5.0345	0.36179	1
4.8621	1.259	1				4.8621	1.4659	1				5.0345	0.43076	1
4.8621	1.328	1				4.8621	1.5349	1				5.0345	0.49972	1
4.8621	1.3969	1				4	1.1034	1				5.0345	0.56869	1
4.8621	1.4659	2				4.8621	1.6038	1				5.0345	0.63765	1
4.8621	1.5349	1				4	1.1724	1				5.0345	0.70662	1
4	1.1034	1				5.0345	0.36179	1				5.0345	0.77558	1
4.8621	1.6038	1				5.0345	0.43076	1				5.0345	0.84455	1
4.8621	1.6728	1				5.0345	0.49972	1				5.0345	0.91352	1
4.8621	1.7418	1				5.0345	0.56869	1				4	1.2414	1
4	1.1724	1				5.0345	0.63765	1				5.0345	0.98248	1
5.0345	0.36179	1				5.0345	0.70662	1				5.0345	1.0514	1
5.0345	0.43076	1				5.0345	0.77558	1				5.0345	1.1204	1
5.0345	0.49972	1				5.0345	0.84455	1				5.0345	1.1894	1
5.0345	0.56869	1				5.0345	0.91352	1				5.0345	1.2583	1
5.0345	0.63765	1				4	1.2414	1				5.0345	1.3273	1
5.0345	0.70662	1				5.0345	0.98248	1				5.0345	1.3963	1
5.0345	0.77558	1				5.0345	1.0514	1				5.0345	1.4652	1
5.0345	0.84455	1				5.0345	1.1204	1				5.0345	1.5342	1
5.0345	0.91352	1				5.0345	1.1894	1				4	0.068966	1
4	1.2414	1				5.0345	1.2583	1				5.2069	0.43371	1
5.0345	0.98248	1				5.0345	1.3273	1				5.2069	0.50268	1
5.0345	1.0514	1				5.0345	1.3963	1				5.2069	0.57164	1
5.0345	1.1204	1				5.0345	1.4652	2				5.2069	0.64061	1
5.0345	1.1894	1				5.0345	1.5342	1				5.2069	0.70958	1
5.0345	1.2583	1				5.0345	1.6032	1				5.2069	0.77854	1
5.0345	1.3273	1				4	0.068966	1				5.2069	0.84751	1
5.0345	1.3963	1				4	1.3103	1				5.2069	0.91647	1
5.0345	1.4652	2				5.0345	1.6721	1				5.2069	0.98544	1
5.0345	1.5342	2				4	1.3793	1				5.2069	1.0544	1
5.0345	1.6032	1				5.2069	0.43371	1				5.2069	1.1234	1
4	0.068966	1				5.2069	0.50268	1				5.2069	1.1923	1
4	1.3103	1				5.2069	0.57164	1				5.2069	1.2613	1
5.0345	1.6721	1				5.2069	0.64061	1				5.2069	1.3303	1
5.0345	1.7411	1				5.2069	0.70958	1				5.2069	1.3992	1
5.0345	1.8101	1				5.2069	0.77854	1				5.2069	1.4682	1
4	1.3793	1				5.2069	0.84751	1				5.2069	1.5372	1
5.2069	0.43371	1				5.2069	0.91647	1				5.2069	1.6061	1
5.2069	0.50268	1				5.2069	0.98544	1				5.3793	0.50943	1
5.2069	0.57164	1				5.2069	1.0544	1				5.3793	0.5784	1
5.2069	0.64061	1				5.2069	1.1234	1				5.3793	0.64736	1
5.2069	0.70958	1				5.2069	1.1923	1				5.3793	0.71633	1
5.2069	0.77854	1				5.2069	1.2613	1				5.3793	0.7853	1
5.2069	0.84751	1				5.2069	1.3303	1				5.3793	0.85426	1
5.2069	0.91647	1				5.2069	1.3992	1				5.3793	0.92323	1
5.2069	0.98544	1				5.2069	1.4682	1				5.3793	0.99219	1
4	1.4483	1				5.2069	1.5372	2				5.3793	1.0612	1
5.2069	1.0544	1				5.2069	1.6061	1				5.3793	1.1301	1
5.2069	1.1234	1				5.2069	1.6751	1				5.3793	1.1991	1
5.2069	1.1923	1				5.2069	1.7441	1				5.3793	1.2681	1
5.2069	1.2613	1				5.3793	0.50943	1				5.3793	1.337	1
5.2069	1.3303	1				5.3793	0.5784	1				5.3793	1.406	1
5.2069	1.3992	1				5.3793	0.64736	1				5.3793	1.475	1
5.2069	1.4682	1				5.3793	0.71633	1				5.3793	1.5439	2
5.2069	1.5372	2				5.3793	0.7853	1				5.3793	1.6129	1
5.2069	1.6061	2				5.3793	0.85426	1				5.3793	1.6818	1
5.2069	1.6751	1				5.3793	0.92323	1				5.5517	0.58915	1
4	1.5172	1				5.3793	0.99219	1				5.5517	0.65812	1
5.2069	1.7441	1				5.3793	1.0612	1				5.5517	0.72708	1
5.2069	1.813	1				5.3793	1.1301	1				5.5517	0.79605	1
5.2069	1.882	1				5.3793	1.1991	1				5.5517	0.86502	1
5.3793	0.50943	1				5.3793	1.2681	1				5.5517	0.93398	1
5.3793	0.5784	1				5.3793	1.337	1				5.5517	1.0029	1
5.3793	0.64736	1				5.3793	1.406	1				5.5517	1.0719	1
5.3793	0.71633	1				5.3793	1.475	1				5.5517	1.1409	1
5.3793	0.7853	1				5.3793	1.5439	2				5.5517	1.2098	1
5.3793	0.85426	1				5.3793	1.6129	2				5.5517	1.2788	1
5.3793	0.92323	1				5.3793	1.6818	1				5.5517	1.3478	1
5.3793	0.99219	1				5.3793	1.7508	1				5.5517	1.4167	1
5.3793	1.0612	1				5.3793	1.8198	1				5.5517	1.4857	1
5.3793	1.1301	1				5.5517	0.58915	1				5.5517	1.5547	2
5.3793	1.1991	1				5.5517	0.65812	1				5.5517	1.6236	1
5.3793	1.2681	1				5.5517	0.72708	1				5.5517	1.6926	1
5.3793	1.337	1				5.5517	0.79605	1				4	0.13793	1
5.3793	1.406	1				5.5517	0.86502	1				5.7241	0.67308	1
5.3793	1.475	1				5.5517	0.93398	1				5.7241	0.74205	1
5.3793	1.5439	1				5.5517	1.0029	1				5.7241	0.81101	1
5.3793	1.6129	2				5.5517	1.0719	1				5.7241	0.87998	1
5.3793	1.6818	2				5.5517	1.1409	1				5.7241	0.94895	1
5.3793	1.7508	1				5.5517	1.2098	1				5.7241	1.0179	1
5.3793	1.8198	1				5.5517	1.2788	1				5.7241	1.0869	1
5.3793	1.8887	1				5.5517	1.3478	1				5.7241	1.1558	1
5.3793	1.9577	1				5.5517	1.4167	1				5.7241	1.2248	1
5.5517	0.58915	1				5.5517	1.4857	1				4.1724	0.052814	1
5.5517	0.65812	1				5.5517	1.5547	1				5.7241	1.2938	1
5.5517	0.72708	1				5.5517	1.6236	2				5.7241	1.3627	1
5.5517	0.79605	1				5.5517	1.6926	2				5.7241	1.4317	1
5.5517	0.86502	1				5.5517	1.7616	1				5.7241	1.5007	1
5.5517	0.93398	1				5.5517	1.8305	1				5.7241	1.5696	1
5.5517	1.0029	1				5.5517	1.8995	1				5.7241	1.6386	2
5.5517	1.0719	1				4	0.13793	1				5.7241	1.7076	1
5.5517	1.1409	1				5.7241	0.67308	1				5.7241	1.7765	1
5.5517	1.2098	1				5.7241	0.74205	1				4.1724	0.12178	1
5.5517	1.2788	1				5.7241	0.81101	1				4.1724	0.19075	1
5.5517	1.3478	1				5.7241	0.87998	1				5.8966	0.76145	1
5.5517	1.4167	1				5.7241	0.94895	1				5.8966	0.83041	1
5.5517	1.4857	1				5.7241	1.0179	1				5.8966	0.89938	1
5.5517	1.5547	1				5.7241	1.0869	1				5.8966	0.96834	1
5.5517	1.6236	1				5.7241	1.1558	1				5.8966	1.0373	1
5.5517	1.6926	2				5.7241	1.2248	1				5.8966	1.1063	1
5.5517	1.7616	2				4.1724	0.052814	1				5.8966	1.1752	1
5.5517	1.8305	1				5.7241	1.2938	1				5.8966	1.2442	1
5.5517	1.8995	1				5.7241	1.3627	1				5.8966	1.3132	1
5.5517	1.9685	1				5.7241	1.4317	1				4.1724	0.25971	1
5.5517	2.0374	1				5.7241	1.5007	1				5.8966	1.3821	1
4	0.13793	1				5.7241	1.5696	1				5.8966	1.4511	1
5.7241	0.67308	1				5.7241	1.6386	1				5.8966	1.5201	1
5.7241	0.74205	1				5.7241	1.7076	2				5.8966	1.589	1
5.7241	0.81101	1				5.7241	1.7765	2				5.8966	1.658	1
5.7241	0.87998	1				5.7241	1.8455	1				5.8966	1.727	2
5.7241	0.94895	1				5.7241	1.9145	1				5.8966	1.7959	1
5.7241	1.0179	1				4.1724	0.12178	1				5.8966	1.8649	1
5.7241	1.0869	1				4.1724	0.19075	1				4.1724	0.32868	1
5.7241	1.1558	1				5.8966	0.76145	1				4.1724	0.39764	1
5.7241	1.2248	1				5.8966	0.83041	1				6.069	0.85448	1
4.1724	0.052814	1				5.8966	0.89938	1				6.069	0.92344	1
5.7241	1.2938	1				5.8966	0.96834	1				6.069	0.99241	1
5.7241	1.3627	1				5.8966	1.0373	1				6.069	1.0614	1
5.7241	1.4317	1				5.8966	1.1063	1				6.069	1.1303	1
5.7241	1.5007	1				5.8966	1.1752	1				6.069	1.1993	1
5.7241	1.5696	1				5.8966	1.2442	1				6.069	1.2683	1
5.7241	1.6386	1				5.8966	1.3132	1				6.069	1.3372	1
5.7241	1.7076	2				4.1724	0.25971	1				6.069	1.4062	1
5.7241	1.7765	2				5.8966	1.3821	1				4.1724	0.46661	1
5.7241	1.8455	2				5.8966	1.4511	1				6.069	1.4752	1
5.7241	1.9145	1				5.8966	1.5201	1				6.069	1.5441	1
4.1724	0.12178	1				5.8966	1.589	1				6.069	1.6131	1
5.7241	1.9834	1				5.8966	1.658	1				6.069	1.6821	1
5.7241	2.0524	1				5.8966	1.727	2				6.069	1.751	2
5.7241	2.1214	1				5.8966	1.7959	2				6.069	1.82	2
4.1724	0.19075	1				5.8966	1.8649	1				6.069	1.889	1
5.8966	0.76145	1				5.8966	1.9339	1				6.069	1.9579	1
5.8966	0.83041	1				5.8966	2.0028	1				4.1724	0.53557	1
5.8966	0.89938	1				4.1724	0.32868	1				4.1724	0.60454	1
5.8966	0.96834	1				4.1724	0.39764	1				6.2414	0.95242	1
5.8966	1.0373	1				6.069	0.85448	1				6.2414	1.0214	1
5.8966	1.1063	1				6.069	0.92344	1				6.2414	1.0903	1
5.8966	1.1752	1				6.069	0.99241	1				6.2414	1.1593	1
5.8966	1.2442	1				6.069	1.0614	1				6.2414	1.2283	1
5.8966	1.3132	1				6.069	1.1303	1				6.2414	1.2972	1
4.1724	0.25971	1				6.069	1.1993	1				6.2414	1.3662	1
5.8966	1.3821	1				6.069	1.2683	1				6.2414	1.4352	1
5.8966	1.4511	1				6.069	1.3372	1				6.2414	1.5041	1
5.8966	1.5201	1				6.069	1.4062	1				4	0.2069	1
5.8966	1.589	1				4.1724	0.46661	1				4.1724	0.6735	1
5.8966	1.658	1				6.069	1.4752	1				6.2414	1.5731	1
5.8966	1.727	1				6.069	1.5441	1				6.2414	1.6421	1
5.8966	1.7959	2				6.069	1.6131	1				6.2414	1.711	1
5.8966	1.8649	2				6.069	1.6821	1				6.2414	1.78	1
5.8966	1.9339	2				6.069	1.751	1				6.2414	1.849	2
5.8966	2.0028	1				6.069	1.82	2				6.2414	1.9179	1
4.1724	0.32868	1				6.069	1.889	2				6.2414	1.9869	1
5.8966	2.0718	1				6.069	1.9579	1				4.1724	0.74247	1
5.8966	2.1408	1				6.069	2.0269	1				4.1724	0.81143	1
5.8966	2.2097	1				6.069	2.0959	1				6.4138	1.0555	1
4.1724	0.39764	1				4.1724	0.53557	1				6.4138	1.1245	1
6.069	0.85448	1				4.1724	0.60454	1				6.4138	1.1935	1
6.069	0.92344	1				6.2414	0.95242	1				6.4138	1.2624	1
6.069	0.99241	1				6.2414	1.0214	1				6.4138	1.3314	1
6.069	1.0614	1				6.2414	1.0903	1				6.4138	1.4004	1
6.069	1.1303	1				6.2414	1.1593	1				6.4138	1.4693	1
6.069	1.1993	1				6.2414	1.2283	1				6.4138	1.5383	1
6.069	1.2683	1				6.2414	1.2972	1				6.4138	1.6073	1
6.069	1.3372	1				6.2414	1.3662	1				4.1724	0.8804	1
6.069	1.4062	1				6.2414	1.4352	1				6.4138	1.6762	1
4.1724	0.46661	1				6.2414	1.5041	1				6.4138	1.7452	1
6.069	1.4752	1				4	0.2069	1				6.4138	1.8142	1
6.069	1.5441	1				4.1724	0.6735	1				6.4138	1.8831	2
6.069	1.6131	1				6.2414	1.5731	1				6.4138	1.9521	2
6.069	1.6821	1				6.2414	1.6421	1				6.4138	2.0211	1
6.069	1.751	1				6.2414	1.711	1				6.4138	2.09	1
6.069	1.82	1				6.2414	1.78	1				4.1724	0.94937	1
6.069	1.889	2				6.2414	1.849	1				4.1724	1.0183	1
6.069	1.9579	2				6.2414	1.9179	2				6.5862	1.1641	1
6.069	2.0269	2				6.2414	1.9869	2				6.5862	1.2331	1
6.069	2.0959	1				6.2414	2.0559	1				6.5862	1.302	1
4.1724	0.53557	1				6.2414	2.1248	1				6.5862	1.371	1
6.069	2.1648	1				6.2414	2.1938	1				6.5862	1.44	1
6.069	2.2338	1				4.1724	0.74247	1				6.5862	1.5089	1
4.1724	0.60454	1				4.1724	0.81143	1				6.5862	1.5779	1
6.2414	0.95242	1				6.4138	1.0555	1				6.5862	1.6469	1
6.2414	1.0214	1				6.4138	1.1245	1				6.5862	1.7158	1
6.2414	1.0903	1				6.4138	1.1935	1				4.1724	1.0873	1
6.2414	1.1593	1				6.4138	1.2624	1				6.5862	1.7848	1
6.2414	1.2283	1				6.4138	1.3314	1				6.5862	1.8537	1
6.2414	1.2972	1				6.4138	1.4004	1				6.5862	1.9227	1
6.2414	1.3662	1				6.4138	1.4693	1				6.5862	1.9917	2
6.2414	1.4352	1				6.4138	1.5383	1				6.5862	2.0606	2
6.2414	1.5041	1				6.4138	1.6073	1				6.5862	2.1296	1
4	0.2069	1				4.1724	0.8804	1				4.1724	1.1563	1
4.1724	0.6735	1				6.4138	1.6762	1				4.1724	1.2252	1
6.2414	1.5731	1				6.4138	1.7452	1				6.7586	1.2784	1
6.2414	1.6421	1				6.4138	1.8142	1				6.7586	1.3474	1
6.2414	1.711	1				6.4138	1.8831	1				6.7586	1.4163	1
6.2414	1.78	1				6.4138	1.9521	2				6.7586	1.4853	1
6.2414	1.849	1				6.4138	2.0211	2				6.7586	1.5543	1
6.2414	1.9179	2				6.4138	2.09	2				6.7586	1.6232	1
6.2414	1.9869	2				6.4138	2.159	1				6.7586	1.6922	1
6.2414	2.0559	2				6.4138	2.2279	1				6.7586	1.7611	1
6.2414	2.1248	1				4.1724	0.94937	1				6.7586	1.8301	1
6.2414	2.1938	1				4.1724	1.0183	1				4.1724	1.2942	1
4.1724	0.74247	1				6.5862	1.1641	1				6.7586	1.8991	1
6.2414	2.2628	1				6.5862	1.2331	1				6.7586	1.968	1
6.2414	2.3317	1				6.5862	1.302	1				6.7586	2.037	1
4.1724	0.81143	1				6.5862	1.371	1				6.7586	2.106	2
6.4138	1.0555	1				6.5862	1.44	1				6.7586	2.1749	2
6.4138	1.1245	1				6.5862	1.5089	1				6.7586	2.2439	1
6.4138	1.1935	1				6.5862	1.5779	1				4	0.27586	1
6.4138	1.2624	1				6.5862	1.6469	1				6.931	1.3987	1
6.4138	1.3314	1				6.5862	1.7158	1				6.931	1.4677	1
6.4138	1.4004	1				4.1724	1.0873	1				6.931	1.5367	1
6.4138	1.4693	1				6.5862	1.7848	1				6.931	1.6056	1
6.4138	1.5383	1				6.5862	1.8537	1				6.931	1.6746	1
6.4138	1.6073	1				6.5862	1.9227	1				6.931	1.7435	1
4.1724	0.8804	1				6.5862	1.9917	1				6.931	1.8125	1
6.4138	1.6762	1				6.5862	2.0606	2				6.931	1.8815	1
6.4138	1.7452	1				6.5862	2.1296	2				6.931	1.9504	1
6.4138	1.8142	1				6.5862	2.1986	2				6.931	2.0194	1
6.4138	1.8831	1				6.5862	2.2675	1				6.931	2.0884	1
6.4138	1.9521	1				6.5862	2.3365	1				6.931	2.1573	2
6.4138	2.0211	2				4.1724	1.1563	1				6.931	2.2263	2
6.4138	2.09	2				4.1724	1.2252	1				6.931	2.2953	1
6.4138	2.159	2				6.7586	1.2784	1				6.931	2.3642	1
6.4138	2.2279	2				6.7586	1.3474	1				7.1034	1.5254	1
6.4138	2.2969	1				6.7586	1.4163	1				7.1034	1.5944	1
4.1724	0.94937	1				6.7586	1.4853	1				7.1034	1.6633	1
6.4138	2.3659	1				6.7586	1.5543	1				7.1034	1.7323	1
6.4138	2.4348	1				6.7586	1.6232	1				7.1034	1.8013	1
4.1724	1.0183	1				6.7586	1.6922	1				7.1034	1.8702	1
6.5862	1.1641	1				6.7586	1.7611	1				7.1034	1.9392	1
6.5862	1.2331	1				6.7586	1.8301	1				7.1034	2.0082	1
6.5862	1.302	1				4.1724	1.2942	1				7.1034	2.0771	1
6.5862	1.371	1				6.7586	1.8991	1				7.1034	2.1461	1
6.5862	1.44	1				6.7586	1.968	1				7.1034	2.2151	1
6.5862	1.5089	1				6.7586	2.037	1				7.1034	2.284	2
6.5862	1.5779	1				6.7586	2.106	1				7.1034	2.353	2
6.5862	1.6469	1				6.7586	2.1749	2				7.1034	2.422	1
6.5862	1.7158	1				6.7586	2.2439	2				7.2759	1.6588	1
4.1724	1.0873	1				6.7586	2.3129	2				7.2759	1.7278	1
6.5862	1.7848	1				6.7586	2.3818	1				7.2759	1.7967	1
6.5862	1.8537	1				6.7586	2.4508	1				7.2759	1.8657	1
6.5862	1.9227	1				4	0.27586	1				7.2759	1.9346	1
6.5862	1.9917	1				4.1724	1.3632	1				7.2759	2.0036	1
6.5862	2.0606	1				4.1724	1.4321	1				7.2759	2.0726	1
6.5862	2.1296	2				6.931	1.3987	1				7.2759	2.1415	1
6.5862	2.1986	2				6.931	1.4677	1				7.2759	2.2105	1
6.5862	2.2675	2				6.931	1.5367	1				7.2759	2.2795	1
6.5862	2.3365	2				6.931	1.6056	1				7.2759	2.3484	2
6.5862	2.4055	1				6.931	1.6746	1				7.2759	2.4174	2
4.1724	1.1563	1				6.931	1.7435	1				7.2759	2.4864	2
6.5862	2.4744	1				6.931	1.8125	1				7.2759	2.5553	1
6.5862	2.5434	1				6.931	1.8815	1				4	0.34483	1
4.1724	1.2252	1				6.931	1.9504	1				7.4483	1.7992	1
6.7586	1.2784	1				6.931	2.0194	1				7.4483	1.8682	1
6.7586	1.3474	1				6.931	2.0884	1				7.4483	1.9371	1
6.7586	1.4163	1				6.931	2.1573	1				7.4483	2.0061	1
6.7586	1.4853	1				6.931	2.2263	2				7.4483	2.0751	1
6.7586	1.5543	1				6.931	2.2953	2				7.4483	2.144	1
6.7586	1.6232	1				6.931	2.3642	2				7.4483	2.213	1
6.7586	1.6922	1				6.931	2.4332	2				7.4483	2.282	1
6.7586	1.7611	1				6.931	2.5022	1				7.4483	2.3509	1
6.7586	1.8301	1				6.931	2.5711	1				4.3448	0.10842	1
4.1724	1.2942	1				7.1034	1.5254	1				7.4483	2.4199	1
6.7586	1.8991	1				7.1034	1.5944	1				7.4483	2.4889	2
6.7586	1.968	1				7.1034	1.6633	1				7.4483	2.5578	2
6.7586	2.037	1				7.1034	1.7323	1				7.4483	2.6268	2
6.7586	2.106	1				7.1034	1.8013	1				7.4483	2.6958	1
6.7586	2.1749	1				7.1034	1.8702	1				4.3448	0.17738	1
6.7586	2.2439	2				7.1034	1.9392	1				4.3448	0.24635	1
6.7586	2.3129	2				7.1034	2.0082	1				7.6207	1.947	1
6.7586	2.3818	2				7.1034	2.0771	1				7.6207	2.016	1
6.7586	2.4508	2				7.1034	2.1461	1				7.6207	2.085	1
6.7586	2.5198	1				7.1034	2.2151	1				7.6207	2.1539	1
4	0.27586	1				7.1034	2.284	1				7.6207	2.2229	1
4.1724	1.3632	1				7.1034	2.353	2				7.6207	2.2919	1
6.7586	2.5887	1				7.1034	2.422	2				7.6207	2.3608	1
6.7586	2.6577	1				7.1034	2.4909	2				7.6207	2.4298	1
4.1724	1.4321	1				7.1034	2.5599	1				7.6207	2.4988	1
6.931	1.3987	1				7.1034	2.6289	1				4.3448	0.31531	1
6.931	1.4677	1				7.2759	1.6588	1				7.6207	2.5677	1
6.931	1.5367	1				7.2759	1.7278	1				7.6207	2.6367	2
6.931	1.6056	1				7.2759	1.7967	1				7.6207	2.7057	2
6.931	1.6746	1				7.2759	1.8657	1				7.6207	2.7746	1
6.931	1.7435	1				7.2759	1.9346	1				4.3448	0.38428	1
6.931	1.8125	1				7.2759	2.0036	1				4.3448	0.45325	1
6.931	1.8815	1				7.2759	2.0726	1				7.7931	2.1027	1
6.931	1.9504	1				7.2759	2.1415	1				7.7931	2.1717	1
4.1724	1.5011	1				7.2759	2.2105	1				7.7931	2.2406	1
6.931	2.0194	1				7.2759	2.2795	1				7.7931	2.3096	1
6.931	2.0884	1				7.2759	2.3484	1				7.7931	2.3786	1
6.931	2.1573	1				7.2759	2.4174	1				7.7931	2.4475	1
6.931	2.2263	1				7.2759	2.4864	2				7.7931	2.5165	1
6.931	2.2953	2				7.2759	2.5553	2				7.7931	2.5854	1
6.931	2.3642	2				7.2759	2.6243	2				7.7931	2.6544	1
6.931	2.4332	2				7.2759	2.6933	1				4.3448	0.52221	1
6.931	2.5022	2				7.2759	2.7622	1				7.7931	2.7234	2
6.931	2.5711	2				4	0.34483	1				7.7931	2.7923	2
6.931	2.6401	1				7.4483	1.7992	1				7.7931	2.8613	2
4.1724	1.5701	1				7.4483	1.8682	1				7.7931	2.9303	1
6.931	2.7091	1				7.4483	1.9371	1				4.3448	0.59118	1
6.931	2.778	1				7.4483	2.0061	1				4.3448	0.66014	1
7.1034	1.5254	1				7.4483	2.0751	1				7.9655	2.2666	1
7.1034	1.5944	1				7.4483	2.144	1				7.9655	2.3355	1
7.1034	1.6633	1				7.4483	2.213	1				7.9655	2.4045	1
7.1034	1.7323	1				7.4483	2.282	1				7.9655	2.4735	1
7.1034	1.8013	1				7.4483	2.3509	1				7.9655	2.5424	1
7.1034	1.8702	1				4.3448	0.10842	1				7.9655	2.6114	1
7.1034	1.9392	1				7.4483	2.4199	1				7.9655	2.6803	1
7.1034	2.0082	1				7.4483	2.4889	1				7.9655	2.7493	1
7.1034	2.0771	1				7.4483	2.5578	2				7.9655	2.8183	1
7.1034	2.1461	1				7.4483	2.6268	2				4	0.41379	1
7.1034	2.2151	1				7.4483	2.6958	2				4.3448	0.72911	1
7.1034	2.284	1				7.4483	2.7647	2				7.9655	2.8872	2
7.1034	2.353	1				7.4483	2.8337	1				7.9655	2.9562	2
7.1034	2.422	2				7.4483	2.9027	1				7.9655	3.0252	2
7.1034	2.4909	2				4.3448	0.17738	1				7.9655	3.0941	1
7.1034	2.5599	2				4.3448	0.24635	1				4.3448	0.79807	1
7.1034	2.6289	2				7.6207	1.947	1				4.3448	0.86704	1
7.1034	2.6978	2				7.6207	2.016	1				8.1379	2.4391	1
7.1034	2.7668	1				7.6207	2.085	1				8.1379	2.508	1
7.1034	2.8358	1				7.6207	2.1539	1				8.1379	2.577	1
7.1034	2.9047	1				7.6207	2.2229	1				8.1379	2.646	1
7.2759	1.6588	1				7.6207	2.2919	1				8.1379	2.7149	1
7.2759	1.7278	1				7.6207	2.3608	1				8.1379	2.7839	1
7.2759	1.7967	1				7.6207	2.4298	1				8.1379	2.8529	1
7.2759	1.8657	1				7.6207	2.4988	1				8.1379	2.9218	1
7.2759	1.9346	1				4.3448	0.31531	1				8.1379	2.9908	1
7.2759	2.0036	1				7.6207	2.5677	1				4.3448	0.936	1
7.2759	2.0726	1				7.6207	2.6367	1				8.1379	3.0598	2
7.2759	2.1415	1				7.6207	2.7057	2				8.1379	3.1287	2
7.2759	2.2105	1				7.6207	2.7746	2				8.1379	3.1977	2
7.2759	2.2795	1				7.6207	2.8436	2				8.1379	3.2667	1
7.2759	2.3484	1				7.6207	2.9126	2				4.3448	1.005	1
7.2759	2.4174	1				7.6207	2.9815	1				4.3448	1.0739	1
7.2759	2.4864	1				7.6207	3.0505	1				8.3103	2.6207	1
7.2759	2.5553	2				4.3448	0.38428	1				8.3103	2.6897	1
7.2759	2.6243	2				4.3448	0.45325	1				8.3103	2.7586	1
7.2759	2.6933	2				7.7931	2.1027	1				8.3103	2.8276	1
7.2759	2.7622	2				7.7931	2.1717	1				8.3103	2.8966	1
7.2759	2.8312	2				7.7931	2.2406	1				8.3103	2.9655	1
7.2759	2.9002	1				7.7931	2.3096	1				8.3103	3.0345	1
7.2759	2.9691	1				7.7931	2.3786	1				8.3103	3.1035	1
4	0.34483	1				7.7931	2.4475	1				8.3103	3.1724	2
7.4483	1.7992	1				7.7931	2.5165	1				4.3448	1.1429	1
7.4483	1.8682	1				7.7931	2.5854	1				8.3103	3.2414	2
7.4483	1.9371	1				7.7931	2.6544	1				8.3103	3.3104	2
7.4483	2.0061	1				4.3448	0.52221	1				8.3103	3.3793	2
7.4483	2.0751	1				7.7931	2.7234	1				8.3103	3.4483	1
7.4483	2.144	1				7.7931	2.7923	1				4.3448	1.2119	1
7.4483	2.213	1				7.7931	2.8613	2				4.3448	1.2808	1
7.4483	2.282	1				7.7931	2.9303	2				8.4828	2.8119	1
7.4483	2.3509	1				7.7931	2.9992	2				8.4828	2.8809	1
4.3448	0.10842	1				7.7931	3.0682	2				8.4828	2.9499	1
7.4483	2.4199	1				7.7931	3.1372	1				8.4828	3.0188	1
7.4483	2.4889	1				7.7931	3.2061	1				8.4828	3.0878	1
7.4483	2.5578	1				4.3448	0.59118	1				8.4828	3.1568	1
7.4483	2.6268	1				4.3448	0.66014	1				8.4828	3.2257	1
7.4483	2.6958	2				7.9655	2.2666	1				8.4828	3.2947	1
7.4483	2.7647	2				7.9655	2.3355	1				8.4828	3.3637	2
7.4483	2.8337	2				7.9655	2.4045	1				4.3448	1.3498	1
7.4483	2.9027	2				7.9655	2.4735	1				8.4828	3.4326	2
7.4483	2.9716	2				7.9655	2.5424	1				8.4828	3.5016	2
7.4483	3.0406	1				7.9655	2.6114	1				8.4828	3.5706	2
4.3448	0.17738	1				7.9655	2.6803	1				8.4828	3.6395	1
7.4483	3.1096	1				7.9655	2.7493	1				4	0.48276	1
4.3448	0.24635	1				7.9655	2.8183	1				8.6552	3.0133	1
7.6207	1.947	1				4	0.41379	1				8.6552	3.0822	1
7.6207	2.016	1				4.3448	0.72911	1				8.6552	3.1512	1
7.6207	2.085	1				7.9655	2.8872	1				8.6552	3.2202	1
7.6207	2.1539	1				7.9655	2.9562	1				8.6552	3.2891	1
7.6207	2.2229	1				7.9655	3.0252	2				8.6552	3.3581	1
7.6207	2.2919	1				7.9655	3.0941	2				8.6552	3.4271	1
7.6207	2.3608	1				7.9655	3.1631	2				8.6552	3.496	1
7.6207	2.4298	1				7.9655	3.2321	2				8.6552	3.565	2
7.6207	2.4988	1				7.9655	3.301	1				8.6552	3.6339	2
4.3448	0.31531	1				7.9655	3.37	1				8.6552	3.7029	2
7.6207	2.5677	1				4.3448	0.79807	1				8.6552	3.7719	2
7.6207	2.6367	1				4.3448	0.86704	1				8.6552	3.8408	1
7.6207	2.7057	1				8.1379	2.4391	1				8.8276	3.2252	1
7.6207	2.7746	1				8.1379	2.508	1				8.8276	3.2942	1
7.6207	2.8436	2				8.1379	2.577	1				8.8276	3.3631	1
7.6207	2.9126	2				8.1379	2.646	1				8.8276	3.4321	1
7.6207	2.9815	2				8.1379	2.7149	1				8.8276	3.5011	1
7.6207	3.0505	2				8.1379	2.7839	1				8.8276	3.57	1
7.6207	3.1195	2				8.1379	2.8529	1				8.8276	3.639	1
7.6207	3.1884	1				8.1379	2.9218	1				8.8276	3.708	1
4.3448	0.38428	1				8.1379	2.9908	1				8.8276	3.7769	2
7.6207	3.2574	1				4.3448	0.936	1				8.8276	3.8459	2
4.3448	0.45325	1				8.1379	3.0598	1				8.8276	3.9149	2
7.7931	2.1027	1				8.1379	3.1287	1				8.8276	3.9838	2
7.7931	2.1717	1				8.1379	3.1977	2				8.8276	4.0528	1
7.7931	2.2406	1				8.1379	3.2667	2				9	3.4484	1
7.7931	2.3096	1				8.1379	3.3356	2				9	3.5173	1
7.7931	2.3786	1				8.1379	3.4046	2				9	3.5863	1
7.7931	2.4475	1				8.1379	3.4736	1				9	3.6553	1
7.7931	2.5165	1				4.3448	1.005	1				9	3.7242	1
7.7931	2.5854	1				4.3448	1.0739	1				9	3.7932	1
7.7931	2.6544	1				8.3103	2.6207	1				9	3.8622	1
4.3448	0.52221	1				8.3103	2.6897	1				9	3.9311	1
7.7931	2.7234	1				8.3103	2.7586	1				9	4.0001	2
7.7931	2.7923	1				8.3103	2.8276	1				9	4.0691	2
7.7931	2.8613	1				8.3103	2.8966	1				9	4.138	2
7.7931	2.9303	1				8.3103	2.9655	1				9	4.207	2
7.7931	2.9992	2				8.3103	3.0345	1				9	4.276	1
7.7931	3.0682	2				8.3103	3.1035	1				4	0.55172	1
7.7931	3.1372	2				8.3103	3.1724	1				4.5172	0.16696	1
7.7931	3.2061	2				4.3448	1.1429	1				4.5172	0.23592	1
7.7931	3.2751	2				8.3103	3.2414	1				4.5172	0.30489	1
7.7931	3.3441	1				8.3103	3.3104	1				4.5172	0.37385	1
4.3448	0.59118	1				8.3103	3.3793	2				4.5172	0.44282	1
7.7931	3.413	1				8.3103	3.4483	2				4.5172	0.51179	1
4.3448	0.66014	1				8.3103	3.5173	2				4.5172	0.58075	1
7.9655	2.2666	1				8.3103	3.5862	2				4.5172	0.64972	1
7.9655	2.3355	1				8.3103	3.6552	1				4.5172	0.71868	1
7.9655	2.4045	1				8.3103	3.7242	1
7.9655	2.4735	1				4.3448	1.2119	1
7.9655	2.5424	1				4.3448	1.2808	1
7.9655	2.6114	1				8.4828	2.8119	1
7.9655	2.6803	1				8.4828	2.8809	1
7.9655	2.7493	1				8.4828	2.9499	1
7.9655	2.8183	1				8.4828	3.0188	1
4	0.41379	1				8.4828	3.0878	1
4.3448	0.72911	1				8.4828	3.1568	1
7.9655	2.8872	1				8.4828	3.2257	1
7.9655	2.9562	1				8.4828	3.2947	1
7.9655	3.0252	1				8.4828	3.3637	1
7.9655	3.0941	1				4.3448	1.3498	1
7.9655	3.1631	2				8.4828	3.4326	1
7.9655	3.2321	2				8.4828	3.5016	1
7.9655	3.301	2				8.4828	3.5706	2
7.9655	3.37	2				8.4828	3.6395	2
7.9655	3.439	2				8.4828	3.7085	2
7.9655	3.5079	1				8.4828	3.7775	2
4.3448	0.79807	1				8.4828	3.8464	2
7.9655	3.5769	1				8.4828	3.9154	1
4.3448	0.86704	1				4	0.48276	1
8.1379	2.4391	1				4.3448	1.4188	1
8.1379	2.508	1				4.3448	1.4877	1
8.1379	2.577	1				8.6552	3.0133	1
8.1379	2.646	1				8.6552	3.0822	1
8.1379	2.7149	1				8.6552	3.1512	1
8.1379	2.7839	1				8.6552	3.2202	1
8.1379	2.8529	1				8.6552	3.2891	1
8.1379	2.9218	1				8.6552	3.3581	1
8.1379	2.9908	1				8.6552	3.4271	1
4.3448	0.936	1				8.6552	3.496	1
8.1379	3.0598	1				8.6552	3.565	1
8.1379	3.1287	1				8.6552	3.6339	1
8.1379	3.1977	1				8.6552	3.7029	1
8.1379	3.2667	1				8.6552	3.7719	2
8.1379	3.3356	2				8.6552	3.8408	2
8.1379	3.4046	2				8.6552	3.9098	2
8.1379	3.4736	2				8.6552	3.9788	2
8.1379	3.5425	2				8.6552	4.0477	2
8.1379	3.6115	2				8.6552	4.1167	1
8.1379	3.6805	2				8.8276	3.2252	1
4.3448	1.005	1				8.8276	3.2942	1
8.1379	3.7494	1				8.8276	3.3631	1
4.3448	1.0739	1				8.8276	3.4321	1
8.3103	2.6207	1				8.8276	3.5011	1
8.3103	2.6897	1				8.8276	3.57	1
8.3103	2.7586	1				8.8276	3.639	1
8.3103	2.8276	1				8.8276	3.708	1
8.3103	2.8966	1				8.8276	3.7769	1
8.3103	2.9655	1				8.8276	3.8459	1
8.3103	3.0345	1				8.8276	3.9149	1
8.3103	3.1035	1				8.8276	3.9838	1
8.3103	3.1724	1				8.8276	4.0528	2
4.3448	1.1429	1				8.8276	4.1218	2
8.3103	3.2414	1				8.8276	4.1907	2
8.3103	3.3104	1				8.8276	4.2597	2
8.3103	3.3793	1				8.8276	4.3287	1
8.3103	3.4483	1				8.8276	4.3976	1
8.3103	3.5173	2				9	3.4484	1
8.3103	3.5862	2				9	3.5173	1
8.3103	3.6552	2				9	3.5863	1
8.3103	3.7242	2				9	3.6553	1
8.3103	3.7931	2				9	3.7242	1
8.3103	3.8621	2				9	3.7932	1
4.3448	1.2119	1				9	3.8622	1
8.3103	3.9311	1				9	3.9311	1
8.3103	4	1				9	4.0001	1
4.3448	1.2808	2				9	4.0691	1
8.4828	2.8119	1				9	4.138	1
8.4828	2.8809	1				9	4.207	1
8.4828	2.9499	1				9	4.276	2
8.4828	3.0188	1				9	4.3449	2
8.4828	3.0878	1				9	4.4139	2
8.4828	3.1568	1				9	4.4829	2
8.4828	3.2257	1				9	4.5518	2
8.4828	3.2947	1				9	4.6208	1
8.4828	3.3637	1				4	0.55172	1
4.3448	1.3498	1				4.5172	0.16696	1
8.4828	3.4326	1				4.5172	0.23592	1
8.4828	3.5016	1				4.5172	0.30489	1
8.4828	3.5706	1				4.5172	0.37385	1
8.4828	3.6395	1				4.5172	0.44282	1
8.4828	3.7085	1				4.5172	0.51179	1
8.4828	3.7775	2				4.5172	0.58075	1
8.4828	3.8464	2				4.5172	0.64972	1
8.4828	3.9154	2				4.5172	0.71868	1
8.4828	3.9843	2
8.4828	4.0533	2
4	0.48276	1
4.3448	1.4188	1
8.4828	4.1223	1
8.4828	4.1912	1
4.3448	1.4877	1
8.6552	3.0133	1
8.6552	3.0822	1
8.6552	3.1512	1
8.6552	3.2202	1
8.6552	3.2891	1
8.6552	3.3581	1
8.6552	3.4271	1
8.6552	3.496	1
8.6552	3.565	1
4.3448	1.5567	1
8.6552	3.6339	1
8.6552	3.7029	1
8.6552	3.7719	1
8.6552	3.8408	1
8.6552	3.9098	1
8.6552	3.9788	2
8.6552	4.0477	2
8.6552	4.1167	2
8.6552	4.1857	2
8.6552	4.2546	2
4.3448	1.6257	1
8.6552	4.3236	2
8.6552	4.3926	1
8.6552	4.4615	1
8.8276	3.2252	1
8.8276	3.2942	1
8.8276	3.3631	1
8.8276	3.4321	1
8.8276	3.5011	1
8.8276	3.57	1
8.8276	3.639	1
8.8276	3.708	1
8.8276	3.7769	1
8.8276	3.8459	1
8.8276	3.9149	1
8.8276	3.9838	1
8.8276	4.0528	1
8.8276	4.1218	1
8.8276	4.1907	1
8.8276	4.2597	2
8.8276	4.3287	2
8.8276	4.3976	2
8.8276	4.4666	2
8.8276	4.5356	2
8.8276	4.6045	2
8.8276	4.6735	1
8.8276	4.7425	1
9	3.4484	1
9	3.5173	1
9	3.5863	1
9	3.6553	1
9	3.7242	1
9	3.7932	1
9	3.8622	1
9	3.9311	1
9	4.0001	1
9	4.0691	1
9	4.138	1
9	4.207	1
9	4.276	1
9	4.3449	1
9	4.4139	1
9	4.4829	1
9	4.5518	2
9	4.6208	2
9	4.6897	2
9	4.7587	2
9	4.8277	2
9	4.8966	1
9	4.9656	1
9	5.0346	1
4	0.55172	1
4.5172	0.16696	1
4.5172	0.23592	1
4.5172	0.30489	1
4.5172	0.37385	1
4.5172	0.44282	1
4.5172	0.51179	1
4.5172	0.58075	1
4.5172	0.64972	1
4.5172	0.71868	1
