# Supplementary material for: Putting the theory into ‘burstlet theory’ with a biophysical model of burstlets and bursts in the respiratory preBötzinger complex
Source: eLife. 2022 Apr 5;11:e75713. doi: 10.7554/eLife.75713 (PMC9023056; doi:10.7554/eLife.75713)
Supplement: Figure 4—source data 1. [file elife-75713-fig4-data1.xlsx]

## Sheet: Sheet1
A & B
Kbath	Burstlet Frequency	STD Burstlet Freq.	Burstlet Amp	STD Burstlet Amp
4	0	0	0	0
5	0.0287977	0.00728438	5.15	0.454148
6	0.122141	0.0253207	11.962	0.548027
7	0.206567	0.0328383	17.1763	0.44769
8	0.28464	0.0381557	20.8287	0.504868
9	0.362976	0.0415301	20.808	0.664412
E-G
Kbath	Psynca	Burstlet Fraction	Burst Frequency	Burst Amplitude
5	0.04	1	0	NaN
5	0.042414	1	0	NaN
5	0.044828	1	0	NaN
5	0.047241	1	0	NaN
5	0.049655	1	0	NaN
5	0.052069	1	0	NaN
5	0.054483	1	0	NaN
5	0.056897	0.8	0.00889521	43.4375
5	0.05931	0.8	0.0075861	44.9375
5	0.061724	0.8	0.00822504	43.75
5	0.064138	0.75	0.0083724	44.0625
5	0.066552	0.8	0.00815129	46.8125
5	0.068966	0.777778	0.0121892	45.4375
5	0.071379	0.666667	0.0138389	46.5625
5	0.073793	0.666667	0.013598	47.1667
5	0.076207	0.6	0.0142735	46.625
5	0.078621	0.625	0.0155521	47.9583
5	0.081034	0.7	0.0147102	48.7083
5	0.083448	0.555556	0.0176491	49.0938
5	0.085862	0.5	0.02443	48.25
5	0.088276	0.375	0.0252175	48.35
5	0.09069	0.428571	0.0192505	49.7188
5	0.093103	0.2	0.0246832	49.9062
5	0.095517	0.166667	0.0272368	49.625
5	0.097931	0.285714	0.0263713	50.15
5	0.10034	0	0.0347866	50.4107
5	0.10276	0	0.0333927	51.375
5	0.10517	0	0.0364875	50.9286
5	0.10759	0	0.0315816	52.6458
5	0.11	0	0.0335721	52.3929
5.1379	0.04	1	0	NaN
5.1379	0.042414	1	0	NaN
5.1379	0.044828	1	0	NaN
5.1379	0.047241	1	0	NaN
5.1379	0.049655	1	0	NaN
5.1379	0.052069	0.833333	0.00769231	42.875
5.1379	0.054483	0.833333	0.00706914	43.75
5.1379	0.056897	0.857143	0.0100261	44.4375
5.1379	0.05931	0.857143	0.0102965	43.8125
5.1379	0.061724	0.75	0.010777	44.7917
5.1379	0.064138	0.846154	0.0129232	46.0625
5.1379	0.066552	0.818182	0.0121595	45.875
5.1379	0.068966	0.833333	0.0158579	45.4375
5.1379	0.071379	0.785714	0.015921	46.125
5.1379	0.073793	0.714286	0.0185322	47.1875
5.1379	0.076207	0.642857	0.0211842	47.175
5.1379	0.078621	0.666667	0.0197759	46.6562
5.1379	0.081034	0.727273	0.0206612	48.375
5.1379	0.083448	0.666667	0.0192258	48.9375
5.1379	0.085862	0.545455	0.0282765	48.175
5.1379	0.088276	0.545455	0.024975	49.45
5.1379	0.09069	0.5	0.0276014	49.175
5.1379	0.093103	0.461538	0.0333333	49.8393
5.1379	0.095517	0.25	0.0308909	50.4583
5.1379	0.097931	0.416667	0.0342036	51
5.1379	0.10034	0.363636	0.0324289	51.3929
5.1379	0.10276	0	0.0449775	50.9643
5.1379	0.10517	0	0.0439422	51.2812
5.1379	0.10759	0	0.0428816	51.3438
5.1379	0.11	0	0.0437206	52.3333
5.2759	0.04	1	0	NaN
5.2759	0.042414	1	0	NaN
5.2759	0.044828	1	0	NaN
5.2759	0.047241	1	0	NaN
5.2759	0.049655	0.857143	0.00668003	41.6875
5.2759	0.052069	0.833333	0.00786411	42
5.2759	0.054483	0.833333	0.00962835	42.9375
5.2759	0.056897	0.833333	0.00789141	44.875
5.2759	0.05931	0.857143	0.00990884	44.4375
5.2759	0.061724	0.818182	0.0105308	44.3125
5.2759	0.064138	0.846154	0.0120077	46.9375
5.2759	0.066552	0.769231	0.0153468	46.0417
5.2759	0.068966	0.769231	0.0171674	46.1667
5.2759	0.071379	0.727273	0.0169549	46.4167
5.2759	0.073793	0.636364	0.0201993	47.7812
5.2759	0.076207	0.615385	0.0218508	47.375
5.2759	0.078621	0.692308	0.0225802	48.1562
5.2759	0.081034	0.615385	0.0223364	48.8
5.2759	0.083448	0.583333	0.0244888	49.475
5.2759	0.085862	0.461538	0.0327118	48.9643
5.2759	0.088276	0.5	0.0284188	49.3958
5.2759	0.09069	0.5	0.0311769	50.1
5.2759	0.093103	0.538462	0.0311682	50.6875
5.2759	0.095517	0.333333	0.0359491	50.8281
5.2759	0.097931	0.4	0.0310366	51.3333
5.2759	0.10034	0.272727	0.036116	51.8594
5.2759	0.10276	0.181818	0.0438982	51.2639
5.2759	0.10517	0	0.0537634	51.3523
5.2759	0.10759	0.153846	0.062901	51.9432
5.2759	0.11	0	0.0560036	52.2159
5.4138	0.04	1	0	NaN
5.4138	0.042414	1	0	NaN
5.4138	0.044828	0.888889	0.00837521	39.5
5.4138	0.047241	0.888889	0.0101482	43.375
5.4138	0.049655	0.9	0.00932662	43.5
5.4138	0.052069	0.894737	0.0100261	44.625
5.4138	0.054483	0.866667	0.0093791	44.9375
5.4138	0.056897	0.888889	0.0111807	45.625
5.4138	0.05931	0.833333	0.0145012	46.5833
5.4138	0.061724	0.823529	0.0148633	46.625
5.4138	0.064138	0.769231	0.0154297	46.5833
5.4138	0.066552	0.75	0.0173853	46.75
5.4138	0.068966	0.75	0.0173551	48.625
5.4138	0.071379	0.789474	0.0210674	49.125
5.4138	0.073793	0.705882	0.0209952	48.975
5.4138	0.076207	0.764706	0.0233681	49.2188
5.4138	0.078621	0.625	0.0258078	49.5208
5.4138	0.081034	0.705882	0.0268132	50.05
5.4138	0.083448	0.6	0.0287059	50.2083
5.4138	0.085862	0.6	0.0302407	50.6458
5.4138	0.088276	0.571429	0.0312422	50.5625
5.4138	0.09069	0.538462	0.0321172	50.3542
5.4138	0.093103	0.5	0.0381222	51.1562
5.4138	0.095517	0.461538	0.0347062	51.8214
5.4138	0.097931	0.25	0.0446728	49.0556
5.4138	0.10034	0	0.0557165	51.3068
5.4138	0.10276	0.0833333	0.0511876	51.7614
5.4138	0.10517	-0.1	0.0512821	50.1818
5.4138	0.10759	0	0.0543656	52.5795
5.4138	0.11	0	0.051488	51.4432
5.5517	0.04	1	0	NaN
5.5517	0.042414	0.909091	0.00743052	41.625
5.5517	0.044828	0.909091	0.00904323	42.8125
5.5517	0.047241	0.909091	0.0103734	44.5625
5.5517	0.049655	0.904762	0.0106701	44.4375
5.5517	0.052069	0.904762	0.0124626	46.125
5.5517	0.054483	0.857143	0.0145433	45.5
5.5517	0.056897	0.863636	0.0153965	46.375
5.5517	0.05931	0.863636	0.0174155	47.0833
5.5517	0.061724	0.789474	0.0192209	46.3438
5.5517	0.064138	0.8	0.0203971	47.7188
5.5517	0.066552	0.736842	0.0228598	48.15
5.5517	0.068966	0.8	0.0204137	49.5938
5.5517	0.071379	0.75	0.0240211	49.2
5.5517	0.073793	0.647059	0.0283511	48.4167
5.5517	0.076207	0.666667	0.0298829	49.0625
5.5517	0.078621	0.666667	0.0297407	49.9792
5.5517	0.081034	0.666667	0.0295613	50.8333
5.5517	0.083448	0.5625	0.0322754	50.875
5.5517	0.085862	0.5	0.0384404	50.1875
5.5517	0.088276	0.4	0.0430339	50.3611
5.5517	0.09069	0.25	0.0445484	49
5.5517	0.093103	0.0909091	0.0517717	49.7
5.5517	0.095517	0	0.054484	49.8523
5.5517	0.097931	0	0.0542123	51.2386
5.5517	0.10034	0	0.0530729	52.0455
5.5517	0.10276	0	0.054095	52.2386
5.5517	0.10517	0	0.0537115	53.0568
5.5517	0.10759	0	0.0536161	53.3125
5.5517	0.11	0.0909091	0.0494832	55.1375
5.6897	0.04	0.92	0.00957488	39.6875
5.6897	0.042414	0.92	0.0103008	43.0625
5.6897	0.044828	0.92	0.0124069	42.8125
5.6897	0.047241	0.92	0.0124595	44.4375
5.6897	0.049655	0.88	0.0137476	44.4167
5.6897	0.052069	0.875	0.0154154	45.375
5.6897	0.054483	0.833333	0.017454	46.2188
5.6897	0.056897	0.833333	0.0201667	46.5
5.6897	0.05931	0.8	0.0201715	47.2
5.6897	0.061724	0.833333	0.023836	46.8125
5.6897	0.064138	0.791667	0.0238294	48.2
5.6897	0.066552	0.791667	0.0238067	48.95
5.6897	0.068966	0.73913	0.0290968	48.2292
5.6897	0.071379	0.73913	0.0290867	49.8125
5.6897	0.073793	0.695652	0.0312891	50.0536
5.6897	0.076207	0.681818	0.0371701	49.5
5.6897	0.078621	0.652174	0.0372301	50.3438
5.6897	0.081034	0.636364	0.0386783	51.0781
5.6897	0.083448	0.636364	0.038807	50.9688
5.6897	0.085862	0.52381	0.0473934	51.05
5.6897	0.088276	0.47619	0.051701	50.9432
5.6897	0.09069	0.47619	0.0516903	51.5909
5.6897	0.093103	0.5	0.051736	51.8875
5.6897	0.095517	0.5	0.0516233	52.5125
5.6897	0.097931	0.5	0.0517896	53.1625
5.6897	0.10034	0.5	0.0516885	53.9
5.6897	0.10276	0.45	0.0558722	54.1477
5.6897	0.10517	0.166667	0.0735603	52.9
5.6897	0.10759	0	0.0834115	52.3676
5.6897	0.11	0	0.0834986	52.9044
5.8276	0.04	0.923077	0.00987752	41.125
5.8276	0.042414	0.92	0.0126263	41.75
5.8276	0.044828	0.92	0.0123671	43.3125
5.8276	0.047241	0.88	0.0140568	43.4167
5.8276	0.049655	0.833333	0.0177683	43.4688
5.8276	0.052069	0.84	0.018659	45.375
5.8276	0.054483	0.8	0.0206847	45.375
5.8276	0.056897	0.833333	0.0243586	45.4688
5.8276	0.05931	0.8	0.0243279	46.625
5.8276	0.061724	0.75	0.0299329	47
5.8276	0.064138	0.75	0.029976	47.8125
5.8276	0.066552	0.708333	0.0311074	48.6964
5.8276	0.068966	0.75	0.0301714	49.5208
5.8276	0.071379	0.652174	0.0374452	49.3281
5.8276	0.073793	0.636364	0.0362394	49.4375
5.8276	0.076207	0.652174	0.038542	50.0156
5.8276	0.078621	0.652174	0.0385802	51.5781
5.8276	0.081034	0.619048	0.0459619	50.8594
5.8276	0.083448	0.608696	0.0463929	51.4306
5.8276	0.085862	0.47619	0.0522848	51.3295
5.8276	0.088276	0.5	0.0541301	51.3977
5.8276	0.09069	0.47619	0.0558347	52.4886
5.8276	0.093103	0.315789	0.0650689	52.0192
5.8276	0.095517	0.5	0.0539491	53.3636
5.8276	0.097931	0.5	0.0537981	53.8068
5.8276	0.10034	0.5	0.0537172	54.9091
5.8276	0.10276	0.5	0.0534017	56.2159
5.8276	0.10517	0	0.0862594	52.6597
5.8276	0.10759	0	0.0867347	53.2639
5.8276	0.11	0.0555556	0.0867961	53.7574
5.9655	0.04	0.925926	0.0109914	40.625
5.9655	0.042414	0.925926	0.0130005	43.25
5.9655	0.044828	0.884615	0.0161108	42.4167
5.9655	0.047241	0.884615	0.0161603	44.4583
5.9655	0.049655	0.846154	0.0190767	44.6562
5.9655	0.052069	0.84	0.0212796	45.2812
5.9655	0.054483	0.84	0.0212254	46.3438
5.9655	0.056897	0.8	0.0238949	46.55
5.9655	0.05931	0.75	0.0307579	46.0208
5.9655	0.061724	0.75	0.0307768	47.6875
5.9655	0.064138	0.75	0.0309483	48.5833
5.9655	0.066552	0.72	0.0376742	48.7321
5.9655	0.068966	0.666667	0.0395212	49.0156
5.9655	0.071379	0.666667	0.0396376	49.4844
5.9655	0.073793	0.666667	0.0396152	50.8281
5.9655	0.076207	0.565217	0.0509396	49.55
5.9655	0.078621	0.5	0.0557724	50.3295
5.9655	0.081034	0.5	0.0558098	50.9886
5.9655	0.083448	0.478261	0.0577549	50.9375
5.9655	0.085862	0.333333	0.0680842	50.7232
5.9655	0.088276	0.333333	0.0708601	51.0179
5.9655	0.09069	0.409091	0.0643708	52.7212
5.9655	0.093103	0.105263	0.0839278	50.9706
5.9655	0.095517	0.5	0.0557289	54.8977
5.9655	0.097931	0.521739	0.0557103	55.7273
5.9655	0.10034	0.5	0.0554017	56.9659
5.9655	0.10276	0	0.0908994	52.4097
5.9655	0.10517	0	0.0905411	53.0764
5.9655	0.10759	-0.0555556	0.0908999	53.6053
5.9655	0.11	0	0.0907258	53.9671
6.1034	0.04	0.928571	0.012566	41.4375
6.1034	0.042414	0.892857	0.0151999	42.9167
6.1034	0.044828	0.851852	0.0177179	44.0938
6.1034	0.047241	0.851852	0.0193523	44.4375
6.1034	0.049655	0.846154	0.0223181	45.0625
6.1034	0.052069	0.814815	0.0251857	45.25
6.1034	0.054483	0.814815	0.0264445	46.05
6.1034	0.056897	0.769231	0.030626	47.0208
6.1034	0.05931	0.730769	0.0322373	47.3036
6.1034	0.061724	0.769231	0.0323164	48.9792
6.1034	0.064138	0.64	0.0413565	47.5694
6.1034	0.066552	0.64	0.0413223	48.7361
6.1034	0.068966	0.666667	0.0414889	50
6.1034	0.071379	0.666667	0.0415036	50.1562
6.1034	0.073793	0.64	0.0443853	51.6944
6.1034	0.076207	0.521739	0.0576568	50.0568
6.1034	0.078621	0.521739	0.0575838	50.7159
6.1034	0.081034	0.478261	0.0576097	51.8542
6.1034	0.083448	0.454545	0.0616247	52.1667
6.1034	0.085862	0.363636	0.0724395	51.1161
6.1034	0.088276	0.318182	0.0711889	52.025
6.1034	0.09069	0.2	0.0789723	51.9609
6.1034	0.093103	0.380952	0.0656599	53.4423
6.1034	0.095517	0.478261	0.0573813	56.0104
6.1034	0.097931	0.478261	0.0573215	57.4688
6.1034	0.10034	0.285714	0.0758314	54.4083
6.1034	0.10276	0	0.0922604	53.3092
6.1034	0.10517	0	0.092101	53.7361
6.1034	0.10759	0	0.092081	54.6181
6.1034	0.11	0	0.0919615	54.9514
6.2414	0.04	0.896552	0.0142694	42.375
6.2414	0.042414	0.896552	0.0167785	43.5417
6.2414	0.044828	0.862069	0.019742	44.2188
6.2414	0.047241	0.814815	0.0223739	45.025
6.2414	0.049655	0.821429	0.0253357	45.325
6.2414	0.052069	0.821429	0.0262847	46.55
6.2414	0.054483	0.777778	0.0318066	46.3542
6.2414	0.056897	0.785714	0.0300625	48.2917
6.2414	0.05931	0.740741	0.0332742	48.6607
6.2414	0.061724	0.703704	0.0399909	48.5156
6.2414	0.064138	0.653846	0.0434405	49.375
6.2414	0.066552	0.666667	0.0433745	49.9444
6.2414	0.068966	0.692308	0.04313	50.5469
6.2414	0.071379	0.653846	0.0436777	52.5278
6.2414	0.073793	0.6	0.0513171	52.0375
6.2414	0.076207	0.5	0.0598086	50.8333
6.2414	0.078621	0.5	0.0603004	52.2917
6.2414	0.081034	0.458333	0.0618365	52.5577
6.2414	0.083448	0.318182	0.073723	51.0917
6.2414	0.085862	0.318182	0.0739723	52.2583
6.2414	0.088276	0.363636	0.0702931	53.6607
6.2414	0.09069	0.272727	0.0793231	53.1016
6.2414	0.093103	0.363636	0.0696603	54.8482
6.2414	0.095517	0	0.0956986	51.8625
6.2414	0.097931	0.5	0.0588047	59.1458
6.2414	0.10034	0	0.096584	53.275
6.2414	0.10276	0	0.0963978	54.2375
6.2414	0.10517	0	0.0962773	54.9013
6.2414	0.10759	0	0.0957549	55.2039
6.2414	0.11	0	0.0957243	55.4342
6.3793	0.04	0.870968	0.0174561	43.5938
6.3793	0.042414	0.866667	0.0182326	45.4062
6.3793	0.044828	0.833333	0.0218579	46.225
6.3793	0.047241	0.83871	0.0253872	46.625
6.3793	0.049655	0.793103	0.0282709	46.2708
6.3793	0.052069	0.8	0.0296947	47.7083
6.3793	0.054483	0.793103	0.0326371	47.8333
6.3793	0.056897	0.758621	0.0338906	49
6.3793	0.05931	0.714286	0.0395391	48.7344
6.3793	0.061724	0.703704	0.0442702	48.5781
6.3793	0.064138	0.666667	0.0449085	49.8056
6.3793	0.066552	0.653846	0.0438741	51.1944
6.3793	0.068966	0.56	0.0551937	50.0682
6.3793	0.071379	0.62963	0.049636	52.625
6.3793	0.073793	0.52	0.0600044	51.8229
6.3793	0.076207	0.52	0.0606462	52.4688
6.3793	0.078621	0.458333	0.0629789	52.8462
6.3793	0.081034	0.458333	0.0653168	53.625
6.3793	0.083448	0.391304	0.0724234	52.6964
6.3793	0.085862	0.318182	0.0758972	53.0917
6.3793	0.088276	0.272727	0.0803514	53.5078
6.3793	0.09069	0.190476	0.088388	53
6.3793	0.093103	0.434783	0.0706714	56.8365
6.3793	0.095517	0	0.0990099	52.8188
6.3793	0.097931	0.347826	0.0765111	56.4917
6.3793	0.10034	0.227273	0.0887016	56.4853
6.3793	0.10276	0	0.100828	55.1625
6.3793	0.10517	0	0.101442	55.7812
6.3793	0.10759	0	0.100878	56.2381
6.3793	0.11	0	0.102227	56.8625
6.5172	0.04	0.852941	0.0202778	44
6.5172	0.042414	0.882353	0.0226792	45.8125
6.5172	0.044828	0.848485	0.0262226	45.125
6.5172	0.047241	0.8125	0.0282773	46.3333
6.5172	0.049655	0.8125	0.0323123	47.2292
6.5172	0.052069	0.818182	0.032438	49.2292
6.5172	0.054483	0.75	0.0394277	47.9688
6.5172	0.056897	0.75	0.0393745	49.5781
6.5172	0.05931	0.75	0.0395302	51.0469
6.5172	0.061724	0.633333	0.0532652	48.75
6.5172	0.064138	0.666667	0.05067	51.1625
6.5172	0.066552	0.666667	0.0522042	51.5875
6.5172	0.068966	0.666667	0.0509742	53.9875
6.5172	0.071379	0.586207	0.0613565	52.6042
6.5172	0.073793	0.481481	0.0699828	52.0089
6.5172	0.076207	0.482759	0.0705148	52.7083
6.5172	0.078621	0.482759	0.0706642	53.6917
6.5172	0.081034	0.5	0.0726744	54.5893
6.5172	0.083448	0.384615	0.0825446	54.2344
6.5172	0.085862	0.346154	0.0894855	53.2279
6.5172	0.088276	0.307692	0.0907635	54.0625
6.5172	0.09069	0.307692	0.0885601	54.8681
6.5172	0.093103	0.2	0.0981101	54.55
6.5172	0.095517	0	0.113449	53.2935
6.5172	0.097931	0.5	0.0731405	60.2857
6.5172	0.10034	0.0416667	0.113507	54.6467
6.5172	0.10276	0.0833333	0.111158	55.233
6.5172	0.10517	0	0.114727	55.1522
6.5172	0.10759	0	0.114203	55.8207
6.5172	0.11	0	0.114715	56.5435
6.6552	0.04	0.885714	0.0220297	44.1562
6.6552	0.042414	0.857143	0.0249128	46.05
6.6552	0.044828	0.823529	0.0287026	46.8542
6.6552	0.047241	0.823529	0.0337382	46.0417
6.6552	0.049655	0.794118	0.0339443	48.8571
6.6552	0.052069	0.727273	0.0412499	47.3333
6.6552	0.054483	0.727273	0.0414895	49.7778
6.6552	0.056897	0.757576	0.041632	50.8906
6.6552	0.05931	0.65625	0.0529213	49.8977
6.6552	0.061724	0.645161	0.0546866	49.2045
6.6552	0.064138	0.65625	0.0534988	52.375
6.6552	0.066552	0.65625	0.0551815	53.625
6.6552	0.068966	0.65625	0.0565355	54.9205
6.6552	0.071379	0.5	0.0738163	51.975
6.6552	0.073793	0.482759	0.074476	52.9583
6.6552	0.076207	0.5	0.0746428	54.1167
6.6552	0.078621	0.5	0.0748423	55.0833
6.6552	0.081034	0.448276	0.0789806	53.5312
6.6552	0.083448	0.357143	0.0903198	54.2014
6.6552	0.085862	0.296296	0.0959181	54.0132
6.6552	0.088276	0.230769	0.0999579	54.4813
6.6552	0.09069	0.269231	0.0997893	54.8355
6.6552	0.093103	0.16	0.106826	54.5357
6.6552	0.095517	0.12	0.110271	54.9602
6.6552	0.097931	-0.0416667	0.121704	53.53
6.6552	0.10034	0.12	0.110947	56.2443
6.6552	0.10276	-0.0416667	0.121902	55.795
6.6552	0.10517	-0.0416667	0.121605	55.675
6.6552	0.10759	-0.0416667	0.121359	56.28
6.6552	0.11	-0.0416667	0.121249	56.925
6.7931	0.04	0.864865	0.0251921	45.5
6.7931	0.042414	0.833333	0.0283222	46.6458
6.7931	0.044828	0.805556	0.0308547	47.7679
6.7931	0.047241	0.805556	0.0356083	48.3393
6.7931	0.049655	0.805556	0.0367512	49.6786
6.7931	0.052069	0.771429	0.0434243	49.5938
6.7931	0.054483	0.742857	0.0436205	51.3611
6.7931	0.056897	0.735294	0.0459559	52.1528
6.7931	0.05931	0.676471	0.0558784	50.7614
6.7931	0.061724	0.647059	0.0588424	51.7083
6.7931	0.064138	0.636364	0.0576822	53.3854
6.7931	0.066552	0.666667	0.0578637	55.0455
6.7931	0.068966	0.606061	0.0666815	54.4519
6.7931	0.071379	0.5	0.0782228	53.2734
6.7931	0.073793	0.483871	0.0786328	53.7109
6.7931	0.076207	0.5	0.0788312	55.2969
6.7931	0.078621	0.483871	0.0785176	56.0312
6.7931	0.081034	0.4	0.0893702	55.5347
6.7931	0.083448	0.321429	0.0952179	55.1645
6.7931	0.085862	0.259259	0.104614	54.7375
6.7931	0.088276	0.222222	0.10582	53.9286
6.7931	0.09069	0.148148	0.112832	55.212
6.7931	0.093103	0.25	0.104351	56.7024
6.7931	0.095517	0.483871	0.0810898	62.1172
6.7931	0.097931	0.451613	0.0824572	62.5662
6.7931	0.10034	0	0.126685	55.75
6.7931	0.10276	0	0.127175	56.7067
6.7931	0.10517	0	0.127188	57.3365
6.7931	0.10759	0	0.126917	58.195
6.7931	0.11	0	0.126276	58.4
6.931	0.04	0.842105	0.0275452	46.7917
6.931	0.042414	0.815789	0.031837	46.875
6.931	0.044828	0.842105	0.0328256	49.1875
6.931	0.047241	0.783784	0.0383436	49.5938
6.931	0.049655	0.783784	0.0430875	49.25
6.931	0.052069	0.756757	0.0461042	51.3472
6.931	0.054483	0.756757	0.0462909	52.8472
6.931	0.056897	0.657143	0.0590699	50.6979
6.931	0.05931	0.666667	0.0606662	52.0417
6.931	0.061724	0.628571	0.0622407	53.3462
6.931	0.064138	0.657143	0.0627997	55.1667
6.931	0.066552	0.628571	0.0653168	56.0385
6.931	0.068966	0.484848	0.0823723	53.4926
6.931	0.071379	0.515152	0.0829279	54.5312
6.931	0.073793	0.484848	0.084674	54.875
6.931	0.076207	0.515152	0.0824901	56.6406
6.931	0.078621	0.484848	0.082602	57.9706
6.931	0.081034	0.387097	0.0942803	56.7039
6.931	0.083448	0.3	0.102501	55.8869
6.931	0.085862	0.266667	0.106903	56.1648
6.931	0.088276	0.241379	0.112239	56.392
6.931	0.09069	0.178571	0.115364	55.9565
6.931	0.093103	0.3	0.103767	58.1488
6.931	0.095517	0.515152	0.0825718	64.8906
6.931	0.097931	0.037037	0.128337	56.3654
6.931	0.10034	0	0.132163	56.8269
6.931	0.10276	-0.0384615	0.133238	56.3102
6.931	0.10517	0	0.132556	58.4519
6.931	0.10759	-0.0384615	0.132924	58.0324
6.931	0.11	-0.0384615	0.132221	58.8009
7.069	0.04	0.85	0.0294429	48.6458
7.069	0.042414	0.85	0.0332668	49.1667
7.069	0.044828	0.794872	0.0392949	48.9844
7.069	0.047241	0.794872	0.0394588	51.125
7.069	0.049655	0.736842	0.0479233	50.625
7.069	0.052069	0.736842	0.0515228	52.2875
7.069	0.054483	0.736842	0.0517301	53.775
7.069	0.056897	0.648649	0.0617792	52.9038
7.069	0.05931	0.648649	0.0659631	53.1635
7.069	0.061724	0.648649	0.0650195	54.8558
7.069	0.064138	0.675676	0.0637755	58.1667
7.069	0.066552	0.583333	0.0748663	56.0083
7.069	0.068966	0.5	0.0858553	54.5588
7.069	0.071379	0.514286	0.087604	55.4412
7.069	0.073793	0.5	0.085966	56.6324
7.069	0.076207	0.514286	0.0862627	57.8309
7.069	0.078621	0.454545	0.0919515	57.6111
7.069	0.081034	0.375	0.0998738	57.275
7.069	0.083448	0.322581	0.105485	56.744
7.069	0.085862	0.3125	0.107759	57.9205
7.069	0.088276	0.233333	0.114226	57.0326
7.069	0.09069	0.172414	0.120583	56.6562
7.069	0.093103	0.166667	0.121865	57.035
7.069	0.095517	0	0.137223	56.308
7.069	0.097931	0.137931	0.124572	58.87
7.069	0.10034	0	0.137643	57.8125
7.069	0.10276	0	0.138164	58.9018
7.069	0.10517	0	0.138221	59.2054
7.069	0.10759	0	0.138023	60.3482
7.069	0.11	0	0.137517	60.5312
7.2069	0.04	0.860465	0.0303619	50.5208
7.2069	0.042414	0.833333	0.0357228	50.8036
7.2069	0.044828	0.780488	0.0412839	50.8194
7.2069	0.047241	0.804878	0.0414938	52.7188
7.2069	0.049655	0.75	0.0503694	52.625
7.2069	0.052069	0.717949	0.0515783	54.7159
7.2069	0.054483	0.666667	0.06413	52.6154
7.2069	0.056897	0.666667	0.0645995	54.8654
7.2069	0.05931	0.666667	0.0663277	55.7788
7.2069	0.061724	0.666667	0.0650689	57.5288
7.2069	0.064138	0.666667	0.0666445	59.6731
7.2069	0.066552	0.514286	0.0891365	54.5735
7.2069	0.068966	0.5	0.0899185	56.0903
7.2069	0.071379	0.5	0.0898615	57.2778
7.2069	0.073793	0.513514	0.0901474	58.5069
7.2069	0.076207	0.5	0.0902623	59.5833
7.2069	0.078621	0.382353	0.102775	58.0417
7.2069	0.081034	0.363636	0.103167	58.1905
7.2069	0.083448	0.30303	0.113122	57.6902
7.2069	0.085862	0.30303	0.112659	58.8098
7.2069	0.088276	0.28125	0.116773	58.25
7.2069	0.09069	0.193548	0.126316	57.87
7.2069	0.093103	0.5	0.0896624	67.0764
7.2069	0.095517	0.352941	0.106448	63.8864
7.2069	0.097931	0	0.144137	58.0345
7.2069	0.10034	0	0.143974	59.0776
7.2069	0.10276	0	0.144256	59.8448
7.2069	0.10517	0	0.144211	60.6983
7.2069	0.10759	0	0.143826	61.3276
7.2069	0.11	0	0.143556	61.5268
7.3448	0.04	0.840909	0.0366703	50.0179
7.3448	0.042414	0.818182	0.0383184	52.6562
7.3448	0.044828	0.818182	0.0433813	52.9219
7.3448	0.047241	0.738095	0.0516369	51.8636
7.3448	0.049655	0.761905	0.0530223	54.625
7.3448	0.052069	0.767442	0.0531601	56.7125
7.3448	0.054483	0.675	0.0675828	54.3558
7.3448	0.056897	0.658537	0.0679774	56.2679
7.3448	0.05931	0.65	0.0679348	58.125
7.3448	0.061724	0.65	0.0694667	59.8125
7.3448	0.064138	0.615385	0.0750107	57.7917
7.3448	0.066552	0.486486	0.0933223	56.0789
7.3448	0.068966	0.5	0.0938967	57.4803
7.3448	0.071379	0.5	0.0941521	58.4737
7.3448	0.073793	0.5	0.0942705	60.0789
7.3448	0.076207	0.5	0.0943001	61.6053
7.3448	0.078621	0.371429	0.110783	59.0284
7.3448	0.081034	0.388889	0.106957	60.6136
7.3448	0.083448	0.333333	0.115381	59.2448
7.3448	0.085862	0.242424	0.12309	58.735
7.3448	0.088276	0.21875	0.123546	59.335
7.3448	0.09069	0.0967742	0.136474	57.6473
7.3448	0.093103	0.5	0.0936622	68.8947
7.3448	0.095517	0	0.149177	58.6833
7.3448	0.097931	0.0322581	0.150212	59.3917
7.3448	0.10034	0	0.150361	60.2742
7.3448	0.10276	0	0.150678	61
7.3448	0.10517	0	0.150618	61.8871
7.3448	0.10759	0.0322581	0.150587	62.2917
7.3448	0.11	0	0.15015	62.9542
7.4828	0.04	0.826087	0.0385973	52.25
7.4828	0.042414	0.8	0.0453823	52.5694
7.4828	0.044828	0.8	0.0455529	55.4028
7.4828	0.047241	0.755556	0.0552914	53.5682
7.4828	0.049655	0.755556	0.0554877	56.3977
7.4828	0.052069	0.727273	0.0587481	58.2292
7.4828	0.054483	0.666667	0.070706	56.4018
7.4828	0.056897	0.642857	0.0714432	56.5083
7.4828	0.05931	0.666667	0.0713893	60.4911
7.4828	0.061724	0.642857	0.0756511	60.8333
7.4828	0.064138	0.585366	0.0832726	59.3235
7.4828	0.066552	0.512821	0.0978261	58.0724
7.4828	0.068966	0.487179	0.0982318	59.325
7.4828	0.071379	0.487179	0.0986603	60.3813
7.4828	0.073793	0.487179	0.0986808	61.9125
7.4828	0.076207	0.447368	0.105675	61.8155
7.4828	0.078621	0.394737	0.111868	60.462
7.4828	0.081034	0.305556	0.1222	58.32
7.4828	0.083448	0.235294	0.128048	60.2404
7.4828	0.085862	0.235294	0.129614	59.0481
7.4828	0.088276	0.235294	0.131427	60.6442
7.4828	0.09069	0.487179	0.0982115	69.8563
7.4828	0.093103	0.487179	0.0978574	70.6188
7.4828	0.095517	0.305556	0.125013	65.195
7.4828	0.097931	0.03125	0.156887	60.2137
7.4828	0.10034	0	0.157536	61.5508
7.4828	0.10276	0	0.157328	62.0586
7.4828	0.10517	0	0.157392	62.6953
7.4828	0.10759	0	0.157134	63.625
7.4828	0.11	0	0.157068	63.8952
7.6207	0.04	0.833333	0.0403505	54.2344
7.6207	0.042414	0.791667	0.0475386	53.8625
7.6207	0.044828	0.787234	0.0485071	57.5
7.6207	0.047241	0.73913	0.0579557	56.1458
7.6207	0.049655	0.73913	0.0583864	59.0104
7.6207	0.052069	0.717391	0.0613058	60.7212
7.6207	0.054483	0.666667	0.0745712	58.3167
7.6207	0.056897	0.666667	0.0749384	59.8167
7.6207	0.05931	0.666667	0.0751476	62.0667
7.6207	0.061724	0.644444	0.0766636	63.3203
7.6207	0.064138	0.512195	0.0995598	58.4062
7.6207	0.066552	0.487805	0.102722	59.5
7.6207	0.068966	0.512195	0.103171	60.5125
7.6207	0.071379	0.512195	0.103317	62.0438
7.6207	0.073793	0.5	0.103799	63.9881
7.6207	0.076207	0.45	0.110678	63.267
7.6207	0.078621	0.342105	0.123558	60.725
7.6207	0.081034	0.333333	0.12876	60.9663
7.6207	0.083448	0.257143	0.131289	61.0962
7.6207	0.085862	0.25	0.135898	61.9074
7.6207	0.088276	0.243243	0.136806	62.0045
7.6207	0.09069	0.512195	0.102459	72.1562
7.6207	0.093103	0.512195	0.102503	73.0125
7.6207	0.095517	0.222222	0.13929	64.3393
7.6207	0.097931	0	0.163683	61.3371
7.6207	0.10034	0	0.16422	62.4129
7.6207	0.10276	0	0.164813	63.2576
7.6207	0.10517	0	0.164541	63.7614
7.6207	0.10759	0	0.164136	64.7992
7.6207	0.11	-0.03125	0.164779	64.2386
7.7586	0.04	0.84	0.0429764	56.4062
7.7586	0.042414	0.8	0.0498229	56.45
7.7586	0.044828	0.8	0.0500668	60.7375
7.7586	0.047241	0.755102	0.0608138	58.3021
7.7586	0.049655	0.75	0.0611723	61.625
7.7586	0.052069	0.708333	0.0674414	60.6339
7.7586	0.054483	0.659574	0.0782391	60.0078
7.7586	0.056897	0.659574	0.0783945	62.0312
7.7586	0.05931	0.659574	0.0786906	64.1094
7.7586	0.061724	0.608696	0.089192	63.4097
7.7586	0.064138	0.511628	0.106701	59.8393
7.7586	0.066552	0.522727	0.108073	60.7917
7.7586	0.068966	0.488372	0.108214	62.3636
7.7586	0.071379	0.488372	0.108303	63.858
7.7586	0.073793	0.488372	0.108932	65.6875
7.7586	0.076207	0.414634	0.121091	63.1615
7.7586	0.078621	0.35	0.130753	62.3077
7.7586	0.081034	0.35	0.129507	62.6683
7.7586	0.083448	0.243243	0.139018	62.442
7.7586	0.085862	0.166667	0.149208	61.875
7.7586	0.088276	0.25641	0.141529	63.6336
7.7586	0.09069	0.488372	0.107582	73.6364
7.7586	0.093103	0.488372	0.107077	74.8864
7.7586	0.095517	0.236842	0.141672	65.7026
7.7586	0.097931	-0.0294118	0.172117	61.4286
7.7586	0.10034	-0.0294118	0.172396	62.4179
7.7586	0.10276	-0.0294118	0.17331	63.8393
7.7586	0.10517	-0.0294118	0.172589	64.5214
7.7586	0.10759	0	0.171943	65.7714
7.7586	0.11	0	0.172065	66.7893
7.8966	0.04	0.826923	0.0455944	58.9167
7.8966	0.042414	0.788462	0.0524164	57.4545
7.8966	0.044828	0.784314	0.057006	61.4432
7.8966	0.047241	0.764706	0.0638421	61.1042
7.8966	0.049655	0.745098	0.0641849	63.7596
7.8966	0.052069	0.693878	0.0739411	62.8833
7.8966	0.054483	0.653061	0.0820934	62.1765
7.8966	0.056897	0.673469	0.0822459	64.1797
7.8966	0.05931	0.673469	0.0824901	66.4141
7.8966	0.061724	0.595745	0.0951777	63.7829
7.8966	0.064138	0.488889	0.112325	61.1848
7.8966	0.066552	0.511111	0.112915	63.0682
7.8966	0.068966	0.5	0.113613	63.7554
7.8966	0.071379	0.5	0.113543	65.4239
7.8966	0.073793	0.488889	0.114203	67.0435
7.8966	0.076207	0.380952	0.129159	63.9856
7.8966	0.078621	0.357143	0.139665	63.4676
7.8966	0.081034	0.395349	0.129924	66.774
7.8966	0.083448	0.25641	0.146031	64
7.8966	0.085862	0.210526	0.155613	63.3167
7.8966	0.088276	0.488889	0.112983	74.6196
7.8966	0.09069	0.521739	0.112746	75.1534
7.8966	0.093103	0.511111	0.112504	76.4261
7.8966	0.095517	0.268293	0.146657	68.2042
7.8966	0.097931	0.0540541	0.173452	64.7071
7.8966	0.10034	0	0.179579	64.6562
7.8966	0.10276	0	0.180578	65.8986
7.8966	0.10517	0.027027	0.180468	66.3958
7.8966	0.10759	0	0.180338	67.0694
7.8966	0.11	0	0.179377	67.5208
8.0345	0.04	0.818182	0.0494234	61.5375
8.0345	0.042414	0.8	0.0550964	62.4545
8.0345	0.044828	0.754717	0.0653026	61.2981
8.0345	0.047241	0.759259	0.0673476	64.1538
8.0345	0.049655	0.740741	0.0673157	66.2589
8.0345	0.052069	0.666667	0.0855341	62.5294
8.0345	0.054483	0.673077	0.0861234	64.6691
8.0345	0.056897	0.673077	0.0865988	66.8603
8.0345	0.05931	0.653846	0.0867701	67.5208
8.0345	0.061724	0.591837	0.0992374	66.1125
8.0345	0.064138	0.510638	0.117471	62.8804
8.0345	0.066552	0.5	0.119171	64.4115
8.0345	0.068966	0.5	0.119357	65.5781
8.0345	0.071379	0.5	0.11906	67.2188
8.0345	0.073793	0.5	0.119867	69.1615
8.0345	0.076207	0.434783	0.130426	66.9183
8.0345	0.078621	0.318182	0.147944	64.7625
8.0345	0.081034	0.355556	0.146766	65.4397
8.0345	0.083448	0.302326	0.147523	66.1375
8.0345	0.085862	0.2	0.162525	64.1914
8.0345	0.088276	0.510638	0.118637	76.3043
8.0345	0.09069	0.5	0.118496	77.0365
8.0345	0.093103	0.489362	0.117997	78.8385
8.0345	0.095517	0.302326	0.15131	70.3292
8.0345	0.097931	0.0512821	0.182057	65.8412
8.0345	0.10034	0	0.18841	65.4178
8.0345	0.10276	0	0.189413	66.7862
8.0345	0.10517	0	0.189375	67.4408
8.0345	0.10759	0	0.187932	67.4803
8.0345	0.11	0	0.187817	68.3421
8.1724	0.04	0.830508	0.0499168	66.125
8.1724	0.042414	0.793103	0.0581211	65.7604
8.1724	0.044828	0.75	0.0679774	64.7054
8.1724	0.047241	0.754386	0.0708679	66.7054
8.1724	0.049655	0.732143	0.0711021	67.2583
8.1724	0.052069	0.666667	0.0903582	65.1181
8.1724	0.054483	0.666667	0.0906377	66.8889
8.1724	0.056897	0.648148	0.0915099	68.0658
8.1724	0.05931	0.596154	0.101307	66.4881
8.1724	0.061724	0.615385	0.102052	68.7188
8.1724	0.064138	0.5	0.123597	65.07
8.1724	0.066552	0.48	0.125742	65.149
8.1724	0.068966	0.5	0.124766	67.605
8.1724	0.071379	0.5	0.124987	68.79
8.1724	0.073793	0.5	0.125839	70.765
8.1724	0.076207	0.44898	0.132856	69.6343
8.1724	0.078621	0.404255	0.14064	69.0134
8.1724	0.081034	0.326087	0.153689	67.1815
8.1724	0.083448	0.190476	0.171038	64.875
8.1724	0.085862	0.382979	0.146889	71.0776
8.1724	0.088276	0.311111	0.153249	70.3226
8.1724	0.09069	0.5	0.124172	79.075
8.1724	0.093103	0.5	0.124714	79.665
8.1724	0.095517	0.25	0.1638	70.7879
8.1724	0.097931	0.025	0.193522	66.1282
8.1724	0.10034	0	0.19691	66.3906
8.1724	0.10276	0	0.197408	67.4031
8.1724	0.10517	0	0.196423	68.0865
8.1724	0.10759	0	0.19685	68.484
8.1724	0.11	0	0.195957	69.4006
8.3103	0.04	0.822581	0.0569282	67.1477
8.3103	0.042414	0.786885	0.0614314	69.0962
8.3103	0.044828	0.803279	0.0617145	71.1146
8.3103	0.047241	0.75	0.0750348	69.3833
8.3103	0.049655	0.754098	0.0753661	71.2417
8.3103	0.052069	0.666667	0.0951877	67.4671
8.3103	0.054483	0.666667	0.0958569	69.4145
8.3103	0.056897	0.672414	0.0961333	71.0855
8.3103	0.05931	0.618182	0.104932	70.4345
8.3103	0.061724	0.625	0.105742	71.4048
8.3103	0.064138	0.5	0.130005	66.9423
8.3103	0.066552	0.490566	0.1313	68.4722
8.3103	0.068966	0.5	0.131303	69.3606
8.3103	0.071379	0.5	0.131	70.5962
8.3103	0.073793	0.490566	0.131953	72.7361
8.3103	0.076207	0.480769	0.135572	73.1389
8.3103	0.078621	0.4	0.149917	69.8333
8.3103	0.081034	0.38	0.150678	69.7379
8.3103	0.083448	0.319149	0.158844	69.9336
8.3103	0.085862	0.186047	0.172379	67.5607
8.3103	0.088276	0.181818	0.185244	67.3715
8.3103	0.09069	0.480769	0.130627	79.4398
8.3103	0.093103	0.490566	0.131699	81.0185
8.3103	0.095517	0.276596	0.171002	71.8787
8.3103	0.097931	0.136364	0.188257	69.9441
8.3103	0.10034	0	0.206271	67.6524
8.3103	0.10276	0	0.20642	68.4939
8.3103	0.10517	0	0.205128	68.8994
8.3103	0.10759	0	0.206207	69.8415
8.3103	0.11	0	0.205287	69.5536
8.4483	0.04	0.815385	0.0577428	71.3542
8.4483	0.042414	0.8	0.0647249	71.5096
8.4483	0.044828	0.796875	0.0648789	74.7019
8.4483	0.047241	0.746032	0.0789889	71.75
8.4483	0.049655	0.746032	0.0793147	73.9141
8.4483	0.052069	0.75	0.0797279	77.2969
8.4483	0.054483	0.666667	0.100753	71.4375
8.4483	0.056897	0.666667	0.101496	73.3563
8.4483	0.05931	0.672131	0.101572	75.5938
8.4483	0.061724	0.65	0.108354	74.619
8.4483	0.064138	0.633333	0.107066	77.4716
8.4483	0.066552	0.655738	0.106202	78.8155
8.4483	0.068966	0.490909	0.138604	71.2321
8.4483	0.071379	0.490909	0.138263	72.4732
8.4483	0.073793	0.5	0.138732	73.0625
8.4483	0.076207	0.490909	0.139391	73.6696
8.4483	0.078621	0.433962	0.149793	73.725
8.4483	0.081034	0.372549	0.159777	71.7812
8.4483	0.083448	0.384615	0.162253	72.3906
8.4483	0.085862	0.23913	0.174771	70.05
8.4483	0.088276	0.25	0.176269	70.6424
8.4483	0.09069	0.490909	0.137112	82.2143
8.4483	0.093103	0.5	0.138376	82.8661
8.4483	0.095517	0.3	0.172169	75.1571
8.4483	0.097931	0.191489	0.189239	72.3783
8.4483	0.10034	0	0.215098	69.0349
8.4483	0.10276	0	0.213915	69.0698
8.4483	0.10517	-0.0232558	0.216603	69.5795
8.4483	0.10759	0	0.215452	70.1761
8.4483	0.11	0	0.213893	71.1948
8.5862	0.04	0.791045	0.0674624	71.5982
8.5862	0.042414	0.787879	0.0698174	73.5357
8.5862	0.044828	0.753846	0.077105	74.1406
8.5862	0.047241	0.742424	0.0825849	75.0882
8.5862	0.049655	0.761194	0.0827084	76.6484
8.5862	0.052069	0.761194	0.0831025	79.3047
8.5862	0.054483	0.666667	0.105474	74.1012
8.5862	0.056897	0.671875	0.106067	75.9762
8.5862	0.05931	0.65625	0.107494	77.9318
8.5862	0.061724	0.634921	0.11318	77.3152
8.5862	0.064138	0.629032	0.114061	78.6793
8.5862	0.066552	0.65625	0.109638	82.6364
8.5862	0.068966	0.612903	0.118569	80.2865
8.5862	0.071379	0.5	0.144673	74.431
8.5862	0.073793	0.5	0.144509	75.5474
8.5862	0.076207	0.482759	0.146022	75.8
8.5862	0.078621	0.473684	0.148338	77.2583
8.5862	0.081034	0.388889	0.164508	73.8598
8.5862	0.083448	0.358491	0.171929	74.0184
8.5862	0.085862	0.229167	0.184332	71.7973
8.5862	0.088276	0.491228	0.144449	82.194
8.5862	0.09069	0.5	0.1439	83.431
8.5862	0.093103	0.26	0.187715	73.9561
8.5862	0.095517	0.307692	0.180134	76.3819
8.5862	0.097931	0.166667	0.199468	72.9688
8.5862	0.10034	0.0652174	0.218001	70.8198
8.5862	0.10276	0	0.224604	69.7306
8.5862	0.10517	0	0.224788	71.25
8.5862	0.10759	0	0.222672	71.8917
8.5862	0.11	0	0.223078	72.1
8.7241	0.04	0.757576	0.0822008	71.375
8.7241	0.042414	0.746269	0.0835771	71.1544
8.7241	0.044828	0.75	0.0846203	75.3456
8.7241	0.047241	0.753623	0.0857173	78.1397
8.7241	0.049655	0.73913	0.0868943	79.8194
8.7241	0.052069	0.692308	0.103205	76.65
8.7241	0.054483	0.666667	0.107648	77.3864
8.7241	0.056897	0.671642	0.110236	79.5
8.7241	0.05931	0.651515	0.111686	80.6902
8.7241	0.061724	0.625	0.120659	78.7812
8.7241	0.064138	0.651515	0.113192	83.2391
8.7241	0.066552	0.615385	0.121065	82.69
8.7241	0.068966	0.625	0.12306	82.7604
8.7241	0.071379	0.603175	0.125235	83.31
8.7241	0.073793	0.5	0.149793	78.1083
8.7241	0.076207	0.483333	0.150286	78.8952
8.7241	0.078621	0.483333	0.153155	80.0806
8.7241	0.081034	0.403509	0.170208	76.5735
8.7241	0.083448	0.392857	0.168402	77.7022
8.7241	0.085862	0.37037	0.171144	77.4559
8.7241	0.088276	0.5	0.149577	84.5458
8.7241	0.09069	0.345455	0.177611	79.0243
8.7241	0.093103	0.25	0.191958	75.6763
8.7241	0.095517	0.421053	0.1628	83.9318
8.7241	0.097931	0.196078	0.201755	74.811
8.7241	0.10034	0	0.228705	71.3179
8.7241	0.10276	0.0212766	0.229545	72.7473
8.7241	0.10517	0	0.232888	72.9814
8.7241	0.10759	0	0.230935	72.7935
8.7241	0.11	0	0.232031	73.4565
8.8621	0.04	0.746269	0.0844862	73.3309
8.8621	0.042414	0.716418	0.0916777	75.2632
8.8621	0.044828	0.681818	0.106202	72.5833
8.8621	0.047241	0.666667	0.109603	73.483
8.8621	0.049655	0.656716	0.112119	75.9674
8.8621	0.052069	0.671642	0.111857	78.8409
8.8621	0.054483	0.676471	0.112299	80.4261
8.8621	0.056897	0.647059	0.115869	81.776
8.8621	0.05931	0.636364	0.121257	81.0469
8.8621	0.061724	0.6	0.130358	80.9327
8.8621	0.064138	0.621212	0.124159	84.29
8.8621	0.066552	0.6	0.129172	82.1154
8.8621	0.068966	0.548387	0.139003	81.3795
8.8621	0.071379	0.532258	0.144285	82.0388
8.8621	0.073793	0.491803	0.152563	79.7581
8.8621	0.076207	0.5	0.154623	81.996
8.8621	0.078621	0.5	0.155087	82.9556
8.8621	0.081034	0.440678	0.169635	79.7955
8.8621	0.083448	0.5	0.155103	85.2742
8.8621	0.085862	0.327273	0.183805	78.6723
8.8621	0.088276	0.5	0.152594	87.9194
8.8621	0.09069	0.491803	0.152718	89.1411
8.8621	0.093103	0.309091	0.189899	80.5164
8.8621	0.095517	0.466667	0.155466	89.0898
8.8621	0.097931	0.327273	0.185033	83.1149
8.8621	0.10034	0.173077	0.212014	77.9855
8.8621	0.10276	0.0204082	0.236657	74.5781
8.8621	0.10517	0	0.240286	74.0443
8.8621	0.10759	0	0.238845	74.3151
8.8621	0.11	0	0.241789	74.7015
9	0.04	0.75	0.085883	76.0956
9	0.042414	0.676923	0.107423	72.9643
9	0.044828	0.671642	0.110573	75.4432
9	0.047241	0.656716	0.111789	78.8207
9	0.049655	0.671642	0.111916	82.1705
9	0.052069	0.671642	0.112203	83.7102
9	0.054483	0.676471	0.113122	84.608
9	0.056897	0.647059	0.115624	85.3958
9	0.05931	0.606061	0.129992	83.6394
9	0.061724	0.584615	0.135586	83.5694
9	0.064138	0.555556	0.13978	84.2009
9	0.066552	0.52381	0.145743	82.2625
9	0.068966	0.52381	0.150477	83.7625
9	0.071379	0.507937	0.154544	84.2661
9	0.073793	0.5	0.156185	85.5161
9	0.076207	0.507937	0.157101	86.129
9	0.078621	0.5	0.157019	86.9153
9	0.081034	0.5	0.156022	87.5565
9	0.083448	0.492063	0.156978	88.707
9	0.085862	0.491803	0.154799	89.5242
9	0.088276	0.5	0.154416	92.2581
9	0.09069	0.508197	0.153277	94.0417
9	0.093103	0.491803	0.155167	93.1774
9	0.095517	0.491803	0.15247	95.5484
9	0.097931	0.389831	0.175579	88.7743
9	0.10034	0.272727	0.202073	82.7719
9	0.10276	0.169811	0.218141	80.3864
9	0.10517	-0.0204082	0.245614	76.095
9	0.10759	-0.0204082	0.248302	76.77
9	0.11	0	0.247346	77.7526
