# Supplementary material for: Putting the theory into ‘burstlet theory’ with a biophysical model of burstlets and bursts in the respiratory preBötzinger complex
Source: eLife. 2022 Apr 5;11:e75713. doi: 10.7554/eLife.75713 (PMC9023056; doi:10.7554/eLife.75713)
Supplement: Figure 5—source data 1. [file elife-75713-fig5-data1.xlsx]

## Sheet: Sheet1
		Burst Amplitude		NP Recruited		Recruited FR (Hz)							Burst Amplitude		NP Recruited		Recruited FR (Hz)
PCT CAN Block	Burstlet Fraction	Mean	STD	mean	STD	Mean	STD				PCT Ca BLK	Burstlet Fraction	Mean	STD	Mean	STD	Mean	STD
100	0.590361	61.6557	3.98	282.343	1.84619	65.0958	2.95142				0	0.590361	61.6557	3.98	282.343	1.84619	65.0958	2.95142
96.552	0.614458	61.8045	3.9807	281.606	1.34488	65.2559	2.82468				3.44833	0.60241	60.8029	4.27687	280.971	2.50436	64.4169	3.44968
93.103	0.583333	59.2417	3.92558	280.583	1.72999	62.5427	2.91631				6.89667	0.626506	60.2484	4.65399	279.5	3.97573	64.4017	3.65701
89.655	0.666667	62.83	0.487357	280.967	0.718395	65.0641	0.548528				10.345	0.75	67.3458	0.601974	283.583	1.10007	67.2332	3.52857
86.207	0.666667	61.4933	0.426844	280.8	0.805156	63.693	1.10893				13.7933	0.722222	62.9577	3.0561	281.885	1.60815	65.6234	2.81677
82.759	0.659091	60.1903	1.33544	280.742	0.728823	62.3003	1.73427				17.2417	0.72093	60.414	2.75675	280.04	2.15019	64.5662	2.70503
79.31	0.666667	59.4233	0.542938	281.033	1.09807	61.6092	1.80929				20.69	0.738636	59.8	4.94408	278.25	4.49396	64.2381	3.60149
75.862	0.659091	57.7694	1.46763	278.645	1.17042	60.1574	2.49079				24.1383	0.764045	59.5409	5.37684	277.545	7.75658	64.0414	3.83203
72.414	0.658824	55.9717	2.05291	278.3	1.66402	58.7668	3.20769				27.5867	0.77907	58.2275	3.94927	276.45	5.11422	64.0877	2.9327
68.966	0.643678	53.9719	2.73734	275.562	3.0261	57.0195	3.88355				31.035	0.797753	56.55	6.34501	274.211	8.48252	64.4346	4.29153
65.517	0.635294	52.1734	3.10938	273.812	3.67588	55.3347	4.45677				34.4833	0.83871	59.9625	2.81617	279.625	2.27669	65.5293	2.79563
62.069	0.627907	50.0758	3.67445	272.182	4.69344	53.0306	4.46961				37.9317	0.847826	57.1833	2.5645	275.8	4.85798	64.7176	3.14558
58.621	0.627907	48.3	3.2955	270	5.38516	51.3953	4.7062				41.38	0.87234	57.9423	1.45714	277.308	3.85972	64.9139	2.87255
55.172	0.623529	46.4803	3.22979	266.606	5.29705	49.9976	5.11347				44.8283	0.88172	54.7542	2.64218	268.25	10.4283	64.2655	3.33882
51.724	0.635294	45.8703	2.89913	265.094	5.99655	49.3547	5.07134				48.2767	0.88764	50.6727	4.37826	253.818	19.1406	63.9086	3.69461
48.276	0.662651	45.7638	0.984967	269.448	1.08845	48.6491	4.99883				51.7233	0.906977	48.7889	6.68051	252.333	23.1084	63.3936	4.42035
44.828	0.666667	43.3817	1.23466	264.333	2.89272	46.4654	5.578				55.1717	0.923077	49.3857	3.0294	253	9.4163	63.6509	3.95135
41.379	0.662791	40.9567	2.89106	258.867	8.92394	44.7502	6.22875				58.62	0.93617	45.3643	4.99647	238.143	21.193	63.254	4.42083
37.931	0.654762	37.7383	1.50509	250.267	6.06819	42.6559	6.75567				62.0683	0.95	40.99	6.71885	218.2	27.5445	63.127	4.64722
34.483	0.674419	36.7017	2.03169	247.483	5.9017	44.0612	10.9841				65.5167	0.963855	35.325	4.26097	184	26.1661	63.4796	4.33358
31.034	0.7125	33.8792	3.0437	236.25	11.353	42.6031	11.7157				68.965	0.969231	35.8667	0.583809	184.333	2.08167	63.7448	3.85352
27.586	0.883333	33.3	2.92367	230.625	16.0885	42.3321	11.8504				72.4133	1	NaN	0	0	0	0	0
24.138	1	NaN	0	0	0	0	0				75.8617	1	NaN	0	0	0	0	0
20.69	1	NaN	0	0	0	0	0				79.31	1	NaN	0	0	0	0	0
17.241	1	NaN	0	0	0	0	0				82.7583	1	NaN	0	0	0	0	0
13.793	1	NaN	0	0	0	0	0				86.2068	1	NaN	0	0	0	0	0
10.345	1	NaN	0	0	0	0	0				89.6552	1	NaN	0	0	0	0	0
6.8966	1	NaN	0	0	0	0	0				93.1035	1	NaN	0	0	0	0	0
3.4483	1	NaN	0	0	0	0	0				96.5517	1	NaN	0	0	0	0	0
0	1	NaN	0	0	0	0	0				100	1	NaN	0	0	0	0	0
