# Supplementary material for: Putting the theory into ‘burstlet theory’ with a biophysical model of burstlets and bursts in the respiratory preBötzinger complex
Source: eLife. 2022 Apr 5;11:e75713. doi: 10.7554/eLife.75713 (PMC9023056; doi:10.7554/eLife.75713)
Supplement: Figure 6—source data 1. [file elife-75713-fig6-data1.xlsx]

## Sheet: Sheet1
(D-F) Increasing gMU							(D-F) Increasing Synaptic Block								H-J
	Burst Frequency		Burst Amplitude					Burst Frequency		Burst Amplitude						Frequency		Amplitude
gMU	Mean	STD	Mean	STD	Burstlet Fraction		Syn Block (%)	Mean	STD	Mean	STD	Burstlet Fraction			Sim. DAMGO	mean	STD	mean	STD	Burstlet Fraction
0	0.227545	0.0362101	70.9135	1.02724	0		0	0.227545	0.0362101	70.9135	1.02724	0			BL	0.227545	0.0362101	70.9135	1.02724	0
0.010345	0.221133	0.0357389	71.6151	1.29003	0		1.724	0.22619	0.0360492	71.1314	1.03195	0			1	0.18695	0.0220645	73.7617	4.63032	0.0857143
0.02069	0.215388	0.035461	73.3446	1.02842	0		3.448	0.224932	0.0357316	71.0705	0.789422	0			2	0.1315	0.0194882	81.6793	6.50719	0.206897
0.031034	0.208905	0.0350686	74.3264	1.17461	0		5.172	0.220029	0.0345376	70.5625	0.936655	0			3	0.10242	0.0181159	85.5147	6.79483	0.227273
0.041379	0.201613	0.0348155	76.6654	1.0191	0		6.897	0.217918	0.0347222	70.7534	0.963522	0			4	0.0432825	0.012527	91.5	2.20652	0.571429
0.051724	0.193822	0.0339955	78.4394	0.842662	0		8.621	0.200243	0.0239776	73.1654	5.96015	0.128205
0.062069	0.186231	0.0331375	79.8047	0.905259	0		10.345	0.209757	0.0325059	71.1944	1.42222	0
0.072414	0.178462	0.0329247	81.3125	0.733842	0		12.069	0.173528	0.0252991	77.2833	7.96963	0.285714
0.082759	0.171317	0.0321398	82.3879	0.593252	0		13.793	0.175822	0.0252303	76.5542	7.78874	0.268293
0.093103	0.164594	0.0312419	83.5134	1.02477	0		15.517	0.156608	0.0263597	80.1019	7.75775	0.372093
0.10345	0.15817	0.0306431	84.7639	0.862084	0		17.241	0.159041	0.0262187	79.4861	7.9206	0.357143
0.11379	0.152495	0.0302115	85.3606	0.990787	0		18.966	0.155608	0.026738	80.024	7.51948	0.365854
0.12414	0.146834	0.0303073	85.651	0.869141	0		20.69	0.156853	0.0260793	79.6019	7.01244	0.341463
0.13448	0.140966	0.0288801	86.651	0.919283	0		22.414	0.155299	0.026455	79.9567	7.23697	0.35
0.14483	0.135052	0.0285028	87.0435	1.10243	0		24.138	0.151153	0.0267178	80.54	6.78288	0.375
0.15517	0.129049	0.0285942	87.5119	0.951072	0		25.862	0.147293	0.0196273	80.705	7.35731	0.390244
0.16552	0.12335	0.0272691	88.0833	1.10279	0		27.586	0.147096	0.0269398	80.349	6.41065	0.384615
0.17586	0.117589	0.0268009	88.775	0.883511	0		29.31	0.139152	0.0202278	81.288	7.7581	0.425
0.18621	0.112066	0.0262475	89.0592	0.905585	0		31.034	0.135036	0.0198142	80.6793	8.8685	0.439024
0.19655	0.106312	0.0263158	88.8088	1.32812	0		32.759	0.1276	0.0282332	85.3571	0.698532	0.487805
0.2069	0.100946	0.0251004	89.7794	0.807109	0		34.483	0.126167	0.0280209	84.9821	0.802618	0.487805
0.21724	0.0954077	0.0245436	90.6406	1.27465	0		36.207	0.125961	0.0201596	82.0687	8.49724	0.473684
0.22759	0.0893427	0.0237355	90.4667	1.22881	0		37.931	0.117172	0.013153	82.0724	9.35037	0.512821
0.23793	0.082999	0.0238181	91.5769	1.18754	0		39.655	0.104275	0.0174095	86.3824	6.59952	0.575
0.24828	0.0758725	0.0218362	91.1827	0.932089	0		41.379	0.0967992	0.0154241	86.3359	7.59149	0.609756
0.25862	0.0674582	0.0212233	91.25	1.1686	0		43.103	0.0894226	0.017937	88.2083	4.35241	0.634146
0.26897	0	0	0	0	NaN		44.828	0.0909682	0.0151853	87.0833	7.62173	0.625
0.27931	0	0	0	0	NaN		46.552	0.085034	0.015599	88.8661	6.17171	0.65
0.28966	0	0	0	0	NaN		48.276	0.0859423	0.0173998	86.2583	8.2997	0.642857
0.3	0	0	0	0	NaN		50	0.0892735	0.0180566	86.6875	7.3094	0.621622
