# Supplementary material for: Putting the theory into ‘burstlet theory’ with a biophysical model of burstlets and bursts in the respiratory preBötzinger complex
Source: eLife. 2022 Apr 5;11:e75713. doi: 10.7554/eLife.75713 (PMC9023056; doi:10.7554/eLife.75713)
Supplement: Figure 7—source data 1. [file elife-75713-fig7-data1.xlsx]

## Sheet: Sheet1
	Panel D: Probability																																						Panels G & H						Panel I
	0	1	2	3	4	5	6	7	8	9	10	11	12	13	14	15	16	17	18	19	20	21	22	23	24	25	26	27	28	29	30	31	32	33	34	35			Time (s)	Num Stim	Delay	STD Delay	Probability		Stimulation Time	# Stimulated	Delay	Seed
3	0	0	0	0	0	0	0	0	0	0	0	0	0	0	0	0.04	0.08	0.2	0.24	0.36	0.4	0.6	0.68	0.76	0.84	0.88	0.96	1	1	1	1	1	1	1	1	1			NaN	NaN	NaN	NaN	NaN		1	8	0.7499	14
4	0	0	0	0	0	0	0	0	0	0	0	0	0	0	0	0.16	0.16	0.28	0.32	0.56	0.68	0.84	0.88	0.92	0.92	0.96	0.96	1	1	1	1	1	1	1	1	1			0	3	NaN	NaN	0		1	9	0.606567	14
5	0	0	0	0	0	0	0	0	0	0	0	0	0.04	0.04	0.08	0.28	0.28	0.44	0.6	0.84	0.84	0.88	0.92	1	1	1	1	1	1	1	1	1	1	1	1	1			0.1	3	NaN	NaN	0		1.1	6	0.70046	14
6	0	0	0	0	0	0	0	0	0	0	0	0.04	0.08	0.12	0.2	0.36	0.48	0.76	0.84	0.92	0.92	0.96	0.96	1	1	1	1	1	1	1	1	1	1	1	1	1			0.2	3	NaN	NaN	0		1.1	7	0.687625	14
7	0	0	0	0	0	0	0	0	0	0	0	0.08	0.12	0.2	0.32	0.48	0.68	0.88	0.92	1	1	1	1	1	1	1	1	1	1	1	1	1	1	1	1	1			0.3	3	NaN	NaN	0		1.1	7	0.603296	22
8	0	0	0	0	0	0	0	0	0	0	0.04	0.12	0.24	0.36	0.56	0.72	0.88	0.96	1	1	1	1	1	1	1	1	1	1	1	1	1	1	1	1	1	1			0.4	3	NaN	NaN	0		1.1	8	0.445885	14
9	0	0	0	0	0	0	0	0	0	0	0.04	0.2	0.44	0.64	0.76	0.84	0.96	1	1	1	1	1	1	1	1	1	1	1	1	1	1	1	1	1	1	1			0.5	3	NaN	NaN	0		1.1	8	0.814629	21
																																							0.6	3	NaN	NaN	0		1.1	8	0.71669	22
	Panel E: Delay (s)																																						0.7	3	NaN	NaN	0		1.1	9	0.607253	8
	0	1	2	3	4	5	6	7	8	9	10	11	12	13	14	15	16	17	18	19	20	21	22	23	24	25	26	27	28	29	30	31	32	33	34	35			0.8	3	NaN	NaN	0		1.1	9	0.425669	14
3	NaN	NaN	NaN	NaN	NaN	NaN	NaN	NaN	NaN	NaN	NaN	NaN	NaN	NaN	NaN	0.721858	0.721942	0.741037	0.59369	0.57477	0.505641	0.498576	0.469968	0.469615	0.429344	0.405539	0.415156	0.397173	0.375891	0.356249	0.341567	0.328774	0.317889	0.307969	0.298787	0.289806			0.9	3	NaN	NaN	0		1.1	9	0.498858	19
4	NaN	NaN	NaN	NaN	NaN	NaN	NaN	NaN	NaN	NaN	NaN	NaN	NaN	NaN	NaN	0.696263	0.572423	0.580881	0.466934	0.518237	0.467211	0.452552	0.416894	0.396199	0.368024	0.367698	0.339036	0.345607	0.321061	0.307666	0.296264	0.285735	0.277285	0.270087	0.262543	0.255179			1	3	NaN	NaN	0		1.1	9	0.75677	21
5	NaN	NaN	NaN	NaN	NaN	NaN	NaN	NaN	NaN	NaN	NaN	NaN	0.636081	0.520558	0.457083	0.638151	0.525744	0.540513	0.483139	0.491455	0.418639	0.383112	0.367145	0.360647	0.339176	0.320476	0.304449	0.291548	0.279966	0.269048	0.260421	0.251447	0.243984	0.238002	0.231868	0.226239			1.1	3	NaN	NaN	0		1.1	9	0.514307	22
6	NaN	NaN	NaN	NaN	NaN	NaN	NaN	NaN	NaN	NaN	NaN	0.70046	0.508146	0.4517	0.533833	0.537519	0.476796	0.509996	0.441121	0.414133	0.374564	0.355124	0.329012	0.32042	0.30297	0.287269	0.274294	0.264319	0.254263	0.244751	0.2373	0.229086	0.223335	0.217791	0.212124	0.207688			1.2	3	NaN	NaN	0		1.2	5	0.636081	14
7	NaN	NaN	NaN	NaN	NaN	NaN	NaN	NaN	NaN	NaN	NaN	0.64546	0.475984	0.510356	0.482829	0.459971	0.451939	0.45544	0.39644	0.38178	0.350681	0.322465	0.302621	0.285342	0.272583	0.259047	0.248011	0.239165	0.22967	0.221671	0.215496	0.209282	0.204468	0.199581	0.194332	0.189382			1.3	3	NaN	NaN	0		1.2	6	0.475889	14
8	NaN	NaN	NaN	NaN	NaN	NaN	NaN	NaN	NaN	NaN	0.7499	0.659068	0.580977	0.493085	0.514353	0.474299	0.462389	0.417498	0.378004	0.342741	0.317537	0.296127	0.2806	0.265997	0.253891	0.241908	0.233156	0.22346	0.216093	0.209767	0.203921	0.198808	0.193837	0.189333	0.184457	0.180859			1.4	3	NaN	NaN	0		1.2	6	0.540403	22
9	NaN	NaN	NaN	NaN	NaN	NaN	NaN	NaN	NaN	NaN	0.606567	0.560572	0.57094	0.50407	0.46318	0.434271	0.40673	0.371381	0.332211	0.304945	0.284326	0.268076	0.253854	0.240681	0.230177	0.220843	0.21193	0.204964	0.198288	0.192253	0.18683	0.182693	0.178457	0.173883	0.169872	0.166669			1.5	3	0.721858	0	0.04		1.2	7	0.53954	12
																																							1.6	3	0.721942	0.362929	0.08		1.2	7	0.43612	14
	Panel F: STD Delay																																						1.7	3	0.741037	0.204395	0.2		1.2	7	0.452292	22
	0	1	2	3	4	5	6	7	8	9	10	11	12	13	14	15	16	17	18	19	20	21	22	23	24	25	26	27	28	29	30	31	32	33	34	35			1.8	3	0.59369	0.125523	0.24		1.2	8	0.648492	8
3	NaN	NaN	NaN	NaN	NaN	NaN	NaN	NaN	NaN	NaN	NaN	NaN	NaN	NaN	NaN	0	0.362929	0.204395	0.125523	0.116965	0.0995811	0.10576	0.107033	0.152844	0.104232	0.0962577	0.145896	0.129655	0.118047	0.103234	0.0963719	0.0937033	0.0916104	0.088025	0.0870366	0.0839794			1.9	3	0.57477	0.116965	0.36		1.2	8	0.535069	12
4	NaN	NaN	NaN	NaN	NaN	NaN	NaN	NaN	NaN	NaN	NaN	NaN	NaN	NaN	NaN	0.219038	0.216058	0.193296	0.110288	0.150313	0.113248	0.120424	0.10102	0.102026	0.0893239	0.134398	0.0974653	0.143891	0.101511	0.0948482	0.0897735	0.086884	0.0839165	0.081259	0.0799582	0.0778356			2	3	0.505641	0.0995811	0.4		1.2	8	0.401941	14
5	NaN	NaN	NaN	NaN	NaN	NaN	NaN	NaN	NaN	NaN	NaN	NaN	0	0	0.0024412	0.225451	0.188137	0.202135	0.142752	0.173485	0.11169	0.0934441	0.107003	0.1131	0.101624	0.0932688	0.087019	0.0828936	0.0806306	0.0783948	0.0756374	0.0723707	0.0706257	0.068672	0.0671865	0.0652462			2.1	3	0.498576	0.10576	0.6		1.2	8	0.879299	19
6	NaN	NaN	NaN	NaN	NaN	NaN	NaN	NaN	NaN	NaN	NaN	0	0.0456184	0.0299083	0.204321	0.198888	0.14495	0.168158	0.132488	0.126847	0.0998595	0.100563	0.0858836	0.094161	0.086156	0.0820486	0.0781435	0.0759005	0.074004	0.0702676	0.0681031	0.065404	0.0634109	0.062226	0.0611671	0.0606334			2.2	3	0.469968	0.107033	0.68		1.2	8	0.565022	21
7	NaN	NaN	NaN	NaN	NaN	NaN	NaN	NaN	NaN	NaN	NaN	0.0596291	0.0556314	0.178605	0.124405	0.114967	0.139849	0.160206	0.109439	0.121927	0.102455	0.0858045	0.0753379	0.0689869	0.0656274	0.063691	0.0605968	0.0589681	0.0559615	0.0546292	0.0526696	0.0511949	0.049884	0.048167	0.0469384	0.0461935			2.3	3	0.469615	0.152844	0.76		1.2	8	0.456036	22
8	NaN	NaN	NaN	NaN	NaN	NaN	NaN	NaN	NaN	NaN	0	0.191005	0.169458	0.122011	0.17341	0.164773	0.167987	0.142526	0.113421	0.0972468	0.0871021	0.0747147	0.0694351	0.0653498	0.0623786	0.0586115	0.0557604	0.0538944	0.0522988	0.0511008	0.0481752	0.04701	0.0452916	0.0437769	0.0420008	0.0415874			2.4	3	0.429344	0.104232	0.84		1.2	9	0.952532	2
9	NaN	NaN	NaN	NaN	NaN	NaN	NaN	NaN	NaN	NaN	0	0.1273	0.189484	0.149448	0.145373	0.16434	0.145897	0.130321	0.10023	0.0853552	0.0731555	0.0673973	0.0630192	0.0598121	0.0556795	0.0535012	0.0508552	0.0485027	0.0453061	0.0441071	0.0423402	0.0413613	0.0401412	0.0380921	0.0374743	0.0367615			2.5	3	0.405539	0.0962577	0.88		1.2	9	0.729953	7
																																							2.6	3	0.415156	0.145896	0.96		1.2	9	0.462932	8
																																							2.7	3	0.397173	0.129655	1		1.2	9	0.743693	9
																																							2.8	3	0.375891	0.118047	1		1.2	9	0.53615	11
																																							2.9	3	0.356249	0.103234	1		1.2	9	0.444438	12
																																							3	3	0.341567	0.0963719	1		1.2	9	0.382434	14
																																							3.1	3	0.328774	0.0937033	1		1.2	9	0.739946	17
																																							3.2	3	0.317889	0.0916104	1		1.2	9	0.376567	19
																																							3.3	3	0.307969	0.088025	1		1.2	9	0.478759	21
																																							3.4	3	0.298787	0.0870366	1		1.2	9	0.432936	22
																																							3.5	3	0.289806	0.0839794	1		1.3	5	0.520558	14
																																							0	4	NaN	NaN	0		1.3	6	0.483735	12
																																							0.1	4	NaN	NaN	0		1.3	6	0.42451	14
																																							0.2	4	NaN	NaN	0		1.3	6	0.446855	22
																																							0.3	4	NaN	NaN	0		1.3	7	0.551299	8
																																							0.4	4	NaN	NaN	0		1.3	7	0.806512	9
																																							0.5	4	NaN	NaN	0		1.3	7	0.386066	12
																																							0.6	4	NaN	NaN	0		1.3	7	0.396124	14
																																							0.7	4	NaN	NaN	0		1.3	7	0.411778	22
																																							0.8	4	NaN	NaN	0		1.3	8	0.681694	7
																																							0.9	4	NaN	NaN	0		1.3	8	0.518611	8
																																							1	4	NaN	NaN	0		1.3	8	0.558491	9
																																							1.1	4	NaN	NaN	0		1.3	8	0.381343	12
																																							1.2	4	NaN	NaN	0		1.3	8	0.366434	14
																																							1.3	4	NaN	NaN	0		1.3	8	0.66943	16
																																							1.4	4	NaN	NaN	0		1.3	8	0.465625	19
																																							1.5	4	0.696263	0.219038	0.16		1.3	8	0.406915	21
																																							1.6	4	0.572423	0.216058	0.16		1.3	8	0.389222	22
																																							1.7	4	0.580881	0.193296	0.28		1.3	9	0.537342	2
																																							1.8	4	0.466934	0.110288	0.32		1.3	9	0.594956	4
																																							1.9	4	0.518237	0.150313	0.56		1.3	9	0.573303	7
																																							2	4	0.467211	0.113248	0.68		1.3	9	0.382595	8
																																							2.1	4	0.452552	0.120424	0.84		1.3	9	0.51895	9
																																							2.2	4	0.416894	0.10102	0.88		1.3	9	0.452765	11
																																							2.3	4	0.396199	0.102026	0.92		1.3	9	0.361818	12
																																							2.4	4	0.368024	0.0893239	0.92		1.3	9	0.354315	14
																																							2.5	4	0.367698	0.134398	0.96		1.3	9	0.625505	15
																																							2.6	4	0.339036	0.0974653	0.96		1.3	9	0.527528	16
																																							2.7	4	0.345607	0.143891	1		1.3	9	0.475163	17
																																							2.8	4	0.321061	0.101511	1		1.3	9	0.780185	18
																																							2.9	4	0.307666	0.0948482	1		1.3	9	0.323952	19
																																							3	4	0.296264	0.0897735	1		1.3	9	0.36443	21
																																							3.1	4	0.285735	0.086884	1		1.3	9	0.373315	22
																																							3.2	4	0.277285	0.0839165	1		1.3	9	0.818997	25
																																							3.3	4	0.270087	0.081259	1		1.4	5	0.45881	12
																																							3.4	4	0.262543	0.0799582	1		1.4	5	0.455357	14
																																							3.5	4	0.255179	0.0778356	1		1.4	6	0.753333	7
																																							0	5	NaN	NaN	0		1.4	6	0.761564	8
																																							0.1	5	NaN	NaN	0		1.4	6	0.376296	12
																																							0.2	5	NaN	NaN	0		1.4	6	0.379851	14
																																							0.3	5	NaN	NaN	0		1.4	6	0.39812	22
																																							0.4	5	NaN	NaN	0		1.4	7	0.69019	7
																																							0.5	5	NaN	NaN	0		1.4	7	0.450234	8
																																							0.6	5	NaN	NaN	0		1.4	7	0.551351	9
																																							0.7	5	NaN	NaN	0		1.4	7	0.338158	12
																																							0.8	5	NaN	NaN	0		1.4	7	0.360403	14
																																							0.9	5	NaN	NaN	0		1.4	7	0.53169	19
																																							1	5	NaN	NaN	0		1.4	7	0.57268	21
																																							1.1	5	NaN	NaN	0		1.4	7	0.367929	22
																																							1.2	5	0.636081	0	0.04		1.4	8	0.693243	4
																																							1.3	5	0.520558	0	0.04		1.4	8	0.559833	7
																																							1.4	5	0.457083	0.0024412	0.08		1.4	8	0.42449	8
																																							1.5	5	0.638151	0.225451	0.28		1.4	8	0.493466	9
																																							1.6	5	0.525744	0.188137	0.28		1.4	8	0.666953	11
																																							1.7	5	0.540513	0.202135	0.44		1.4	8	0.334348	12
																																							1.8	5	0.483139	0.142752	0.6		1.4	8	0.337156	14
																																							1.9	5	0.491455	0.173485	0.84		1.4	8	0.702568	15
																																							2	5	0.418639	0.11169	0.84		1.4	8	0.513119	16
																																							2.1	5	0.383112	0.0934441	0.88		1.4	8	0.51133	17
																																							2.2	5	0.367145	0.107003	0.92		1.4	8	0.374219	19
																																							2.3	5	0.360647	0.1131	1		1.4	8	0.343939	21
																																							2.4	5	0.339176	0.101624	1		1.4	8	0.346131	22
																																							2.5	5	0.320476	0.0932688	1		1.4	8	0.900152	25
																																							2.6	5	0.304449	0.087019	1		1.4	9	0.778467	1
																																							2.7	5	0.291548	0.0828936	1		1.4	9	0.460094	2
																																							2.8	5	0.279966	0.0806306	1		1.4	9	0.554149	3
																																							2.9	5	0.269048	0.0783948	1		1.4	9	0.490404	4
																																							3	5	0.260421	0.0756374	1		1.4	9	0.462955	7
																																							3.1	5	0.251447	0.0723707	1		1.4	9	0.321557	8
																																							3.2	5	0.243984	0.0706257	1		1.4	9	0.41299	9
																																							3.3	5	0.238002	0.068672	1		1.4	9	0.62525	10
																																							3.4	5	0.231868	0.0671865	1		1.4	9	0.409259	11
																																							3.5	5	0.226239	0.0652462	1		1.4	9	0.325248	12
																																							0	6	NaN	NaN	0		1.4	9	0.310513	14
																																							0.1	6	NaN	NaN	0		1.4	9	0.485088	15
																																							0.2	6	NaN	NaN	0		1.4	9	0.453676	16
																																							0.3	6	NaN	NaN	0		1.4	9	0.397761	17
																																							0.4	6	NaN	NaN	0		1.4	9	0.722442	18
																																							0.5	6	NaN	NaN	0		1.4	9	0.293284	19
																																							0.6	6	NaN	NaN	0		1.4	9	0.317133	21
																																							0.7	6	NaN	NaN	0		1.4	9	0.32549	22
																																							0.8	6	NaN	NaN	0		1.4	9	0.654661	25
																																							0.9	6	NaN	NaN	0		1.5	7	0.666889	2
																																							1	6	NaN	NaN	0		1.5	7	0.564085	3
																																							1.1	6	0.70046	0	0.04		1.5	7	0.565	4
																																							1.2	6	0.508146	0.0456184	0.08		1.5	7	0.527612	7
																																							1.3	6	0.4517	0.0299083	0.12		1.5	7	0.384507	8
																																							1.4	6	0.533833	0.204321	0.2		1.5	7	0.505858	9
																																							1.5	6	0.537519	0.198888	0.36		1.5	7	0.307602	12
																																							1.6	6	0.476796	0.14495	0.48		1.5	7	0.318662	14
																																							1.7	6	0.509996	0.168158	0.76		1.5	7	0.522941	16
																																							1.8	6	0.441121	0.132488	0.84		1.5	7	0.416222	19
																																							1.9	6	0.414133	0.126847	0.92		1.5	3	0.721858	12
																																							2	6	0.374564	0.0998595	0.92		1.5	7	0.409669	21
																																							2.1	6	0.355124	0.100563	0.96		1.5	7	0.330601	22
																																							2.2	6	0.329012	0.0858836	0.96		1.5	8	0.895208	1
																																							2.3	6	0.32042	0.094161	1		1.5	8	0.648905	2
																																							2.4	6	0.30297	0.086156	1		1.5	8	0.480851	3
																																							2.5	6	0.287269	0.0820486	1		1.5	8	0.48892	4
																																							2.6	6	0.274294	0.0781435	1		1.5	8	0.433537	7
																																							2.7	6	0.264319	0.0759005	1		1.5	8	0.359483	8
																																							2.8	6	0.254263	0.074004	1		1.5	8	0.381503	9
																																							2.9	6	0.244751	0.0702676	1		1.5	8	0.617299	10
																																							3	6	0.2373	0.0681031	1		1.5	8	0.536829	11
																																							3.1	6	0.229086	0.065404	1		1.5	8	0.305975	12
																																							3.2	6	0.223335	0.0634109	1		1.5	8	0.300913	14
																																							3.3	6	0.217791	0.062226	1		1.5	8	0.542647	15
																																							3.4	6	0.212124	0.0611671	1		1.5	8	0.458411	16
																																							3.5	6	0.207688	0.0606334	1		1.5	8	0.42037	17
																																							0	7	NaN	NaN	0		1.5	8	0.327128	19
																																							0.1	7	NaN	NaN	0		1.5	8	0.303333	21
																																							0.2	7	NaN	NaN	0		1.5	8	0.312019	22
																																							0.3	7	NaN	NaN	0		1.5	8	0.724053	25
																																							0.4	7	NaN	NaN	0		1.5	9	0.632444	1
																																							0.5	7	NaN	NaN	0		1.5	9	0.408901	2
																																							0.6	7	NaN	NaN	0		1.5	9	0.460217	3
																																							0.7	7	NaN	NaN	0		1.5	9	0.402412	4
																																							0.8	7	NaN	NaN	0		1.5	9	0.911934	5
																																							0.9	7	NaN	NaN	0		1.5	9	0.388768	7
																																							1	7	NaN	NaN	0		1.5	9	0.285032	8
																																							1.1	7	0.64546	0.0596291	0.08		1.5	9	0.346959	9
																																							1.2	7	0.475984	0.0556314	0.12		1.5	9	0.480286	10
																																							1.3	7	0.510356	0.178605	0.2		1.5	9	0.376282	11
																																							1.4	7	0.482829	0.124405	0.32		1.5	9	0.292308	12
																																							1.5	7	0.459971	0.114967	0.48		1.5	9	0.641124	13
																																							1.6	7	0.451939	0.139849	0.68		1.5	9	0.281818	14
																																							1.7	7	0.45544	0.160206	0.88		1.5	9	0.408857	15
																																							1.8	7	0.39644	0.109439	0.92		1.5	9	0.419444	16
																																							1.9	7	0.38178	0.121927	1		1.5	9	0.3425	17
																																							2	7	0.350681	0.102455	1		1.5	9	0.678036	18
																																							2.1	7	0.322465	0.0858045	1		1.5	9	0.265819	19
																																							2.2	7	0.302621	0.0753379	1		1.5	9	0.278696	21
																																							2.3	7	0.285342	0.0689869	1		1.5	9	0.298966	22
																																							2.4	7	0.272583	0.0656274	1		1.5	9	0.518884	25
																																							2.5	7	0.259047	0.063691	1		1.6	3	0.465313	12
																																							2.6	7	0.248011	0.0605968	1		1.6	3	0.978571	21
																																							2.7	7	0.239165	0.0589681	1		1.6	4	0.56123	7
																																							2.8	7	0.22967	0.0559615	1		1.6	4	0.450976	8
																																							2.9	7	0.221671	0.0546292	1		1.6	4	0.397525	12
																																							3	7	0.215496	0.0526696	1		1.6	4	0.879961	21
																																							3.1	7	0.209282	0.0511949	1		1.6	5	0.63895	2
																																							3.2	7	0.204468	0.049884	1		1.6	5	0.557312	3
																																							3.3	7	0.199581	0.048167	1		1.6	5	0.549645	7
																																							3.4	7	0.194332	0.0469384	1		1.6	5	0.393798	8
																																							3.5	7	0.189382	0.0461935	1		1.6	5	0.310185	12
																																							0	8	NaN	NaN	0		1.6	5	0.372131	14
																																							0.1	8	NaN	NaN	0		1.6	5	0.858185	21
																																							0.2	8	NaN	NaN	0		1.6	6	0.619474	2
																																							0.3	8	NaN	NaN	0		1.6	6	0.505172	3
																																							0.4	8	NaN	NaN	0		1.6	6	0.657295	4
																																							0.5	8	NaN	NaN	0		1.6	6	0.515023	7
																																							0.6	8	NaN	NaN	0		1.6	6	0.367956	8
																																							0.7	8	NaN	NaN	0		1.6	6	0.528959	11
																																							0.8	8	NaN	NaN	0		1.6	6	0.30431	12
																																							0.9	8	NaN	NaN	0		1.6	6	0.745122	13
																																							1	8	0.7499	0	0.04		1.6	6	0.305867	14
																																							1.1	8	0.659068	0.191005	0.12		1.6	6	0.4475	16
																																							1.2	8	0.580977	0.169458	0.24		1.6	6	0.403439	21
																																							1.3	8	0.493085	0.122011	0.36		1.6	6	0.321429	22
																																							1.4	8	0.514353	0.17341	0.56		1.6	7	0.591401	2
																																							1.5	8	0.474299	0.164773	0.72		1.6	7	0.449667	3
																																							1.6	8	0.462389	0.167987	0.88		1.6	7	0.478856	4
																																							1.7	8	0.417498	0.142526	0.96		1.6	7	0.439869	7
																																							1.8	8	0.378004	0.113421	1		1.6	7	0.317172	8
																																							1.9	8	0.342741	0.0972468	1		1.6	7	0.378947	9
																																							2	8	0.317537	0.0871021	1		1.6	7	0.545455	10
																																							2.1	8	0.296127	0.0747147	1		1.6	7	0.513086	11
																																							2.2	8	0.2806	0.0694351	1		1.6	7	0.275446	12
																																							2.3	8	0.265997	0.0653498	1		1.6	7	0.711864	13
																																							2.4	8	0.253891	0.0623786	1		1.6	7	0.294444	14
																																							2.5	8	0.241908	0.0586115	1		1.6	7	0.427838	16
																																							2.6	8	0.233156	0.0557604	1		1.6	7	0.492969	17
																																							2.7	8	0.22346	0.0538944	1		1.6	7	0.358571	19
																																							2.8	8	0.216093	0.0522988	1		1.6	7	0.35175	21
																																							2.9	8	0.209767	0.0511008	1		1.6	7	0.303571	22
																																							3	8	0.203921	0.0481752	1		1.6	7	0.752063	25
																																							3.1	8	0.198808	0.04701	1		1.6	8	0.664387	1
																																							3.2	8	0.193837	0.0452916	1		1.6	8	0.540753	2
																																							3.3	8	0.189333	0.0437769	1		1.6	8	0.430655	3
																																							3.4	8	0.184457	0.0420008	1		1.6	8	0.446296	4
																																							3.5	8	0.180859	0.0415874	1		1.6	8	0.601271	6
																																							0	9	NaN	NaN	0		1.6	8	0.366477	7
																																							0.1	9	NaN	NaN	0		1.6	8	0.302902	8
																																							0.2	9	NaN	NaN	0		1.6	8	0.32987	9
																																							0.3	9	NaN	NaN	0		1.6	8	0.478	10
																																							0.4	9	NaN	NaN	0		1.6	8	0.490909	11
																																							0.5	9	NaN	NaN	0		1.6	8	0.27439	12
																																							0.6	9	NaN	NaN	0		1.6	8	0.67602	13
																																							0.7	9	NaN	NaN	0		1.6	8	0.266558	14
																																							0.8	9	NaN	NaN	0		1.6	8	0.457031	15
																																							0.9	9	NaN	NaN	0		1.6	8	0.411086	16
																																							1	9	0.606567	0	0.04		1.6	8	0.375874	17
																																							1.1	9	0.560572	0.1273	0.2		1.6	8	0.750962	18
																																							1.2	9	0.57094	0.189484	0.44		1.6	8	0.304792	19
																																							1.3	9	0.50407	0.149448	0.64		1.5	4	0.752182	7
																																							1.4	9	0.46318	0.145373	0.76		1.6	8	0.275455	21
																																							1.5	9	0.434271	0.16434	0.84		1.6	8	0.289935	22
																																							1.6	9	0.40673	0.145897	0.96		1.6	8	0.856232	23
																																							1.7	9	0.371381	0.130321	1		1.6	8	0.5827	25
																																							1.8	9	0.332211	0.10023	1		1.6	9	0.553226	1
																																							1.9	9	0.304945	0.0853552	1		1.6	9	0.37027	2
																																							2	9	0.284326	0.0731555	1		1.6	9	0.419512	3
																																							2.1	9	0.268076	0.0673973	1		1.6	9	0.360677	4
																																							2.2	9	0.253854	0.0630192	1		1.5	4	0.54462	8
																																							2.3	9	0.240681	0.0598121	1		1.6	9	0.610227	5
																																							2.4	9	0.230177	0.0556795	1		1.6	9	0.496753	6
																																							2.5	9	0.220843	0.0535012	1		1.6	9	0.350223	7
																																							2.6	9	0.21193	0.0508552	1		1.6	9	0.262963	8
																																							2.7	9	0.204964	0.0485027	1		1.6	9	0.308213	9
																																							2.8	9	0.198288	0.0453061	1		1.6	9	0.40979	10
																																							2.9	9	0.192253	0.0441071	1		1.6	9	0.351293	11
																																							3	9	0.18683	0.0423402	1		1.6	9	0.263866	12
																																							3.1	9	0.182693	0.0413613	1		1.6	9	0.54183	13
																																							3.2	9	0.178457	0.0401412	1		1.6	9	0.255699	14
																																							3.3	9	0.173883	0.0380921	1		1.6	9	0.358092	15
																																							3.4	9	0.169872	0.0374743	1		1.6	9	0.392593	16
																																							3.5	9	0.166669	0.0367615	1		1.6	9	0.307	17
																																													1.6	9	0.567051	18
																																													1.6	9	0.24918	19
																																													1.6	9	0.482075	20
																																													1.6	9	0.257012	21
																																													1.6	9	0.277296	22
																																													1.6	9	0.861275	23
																																													1.6	9	0.4554	25
																																													1.7	3	0.939447	2
																																													1.7	3	0.802642	7
																																													1.7	3	0.741576	8
																																													1.7	3	0.398624	12
																																													1.5	4	0.506186	12
																																													1.7	3	0.822897	21
																																													1.7	4	0.937678	2
																																													1.7	4	0.484663	7
																																													1.7	4	0.408287	8
																																													1.7	4	0.604869	11
																																													1.7	4	0.355455	12
																																													1.7	4	0.638291	14
																																													1.7	4	0.636923	21
																																													1.7	5	0.539412	2
																																													1.7	5	0.443714	3
																																													1.7	5	0.443617	7
																																													1.7	5	0.357991	8
																																													1.7	5	0.580147	11
																																													1.7	5	0.286598	12
																																													1.7	5	0.327891	14
																																													1.7	5	0.839401	16
																																													1.7	5	0.501702	21
																																													1.7	5	0.756156	22
																																													1.7	5	0.869018	25
																																													1.7	6	0.507609	2
																																													1.7	6	0.430729	3
																																													1.7	6	0.478426	4
																																													1.7	6	0.427353	7
																																													1.7	6	0.322443	8
																																													1.7	6	0.774346	9
																																													1.7	6	0.482895	11
																																													1.7	6	0.280612	12
																																													1.7	6	0.599583	13
																																													1.7	6	0.279615	14
																																													1.7	6	0.8375	15
																																													1.7	6	0.410094	16
																																													1.7	6	0.694025	17
																																													1.7	6	0.621535	18
																																													1.7	6	0.586967	19
																																													1.7	6	0.605556	20
																																													1.7	6	0.365833	21
																																													1.7	6	0.298288	22
																																													1.7	6	0.686511	25
																																													1.7	7	0.820648	1
																																													1.7	7	0.479948	2
																																													1.7	7	0.412288	3
																																													1.7	7	0.433918	4
																																													1.7	7	0.371088	7
																																													1.7	7	0.281208	8
																																													1.7	7	0.328012	9
																																													1.5	4	0.982063	21
																																													1.7	7	0.461084	10
																																													1.7	7	0.465417	11
																																													1.7	7	0.255068	12
																																													1.7	7	0.582544	13
																																													1.7	7	0.27027	14
																																													1.7	7	0.567442	15
																																													1.7	7	0.400641	16
																																													1.7	7	0.428767	17
																																													1.7	7	0.589855	18
																																													1.7	7	0.318182	19
																																													1.7	7	0.574	20
																																													1.7	7	0.318129	21
																																													1.7	7	0.277143	22
																																													1.7	7	0.811275	23
																																													1.7	7	0.572764	25
																																													1.7	8	0.606311	1
																																													1.7	8	0.429121	2
																																													1.7	8	0.399379	3
																																													1.7	8	0.398611	4
																																													1.7	8	0.696923	5
																																													1.7	8	0.47554	6
																																													1.7	8	0.332746	7
																																													1.7	8	0.271164	8
																																													1.7	8	0.294783	9
																																													1.7	8	0.41875	10
																																													1.7	8	0.452167	11
																																													1.7	8	0.253169	12
																																													1.7	8	0.565826	13
																																													1.7	8	0.252174	14
																																													1.7	8	0.410644	15
																																													1.7	8	0.387013	16
																																													1.7	8	0.330714	17
																																													1.7	8	0.506964	18
																																													1.7	8	0.27381	19
																																													1.7	8	0.471802	20
																																													1.7	8	0.258224	21
																																													1.7	8	0.267368	22
																																													1.7	8	0.786475	23
																																													1.7	8	0.480269	25
																																													1.7	9	0.47203	1
																																													1.7	9	0.32642	2
																																													1.7	9	0.388125	3
																																													1.7	9	0.330313	4
																																													1.7	9	0.508108	5
																																													1.7	9	0.436093	6
																																													1.7	9	0.316393	7
																																													1.7	9	0.245868	8
																																													1.7	9	0.272222	9
																																													1.7	9	0.377551	10
																																													1.7	9	0.322671	11
																																													1.7	9	0.250291	12
																																													1.7	9	0.471676	13
																																													1.7	9	0.236111	14
																																													1.7	9	0.313333	15
																																													1.7	9	0.36601	16
																																													1.7	9	0.272642	17
																																													1.7	9	0.445205	18
																																													1.7	9	0.225321	19
																																													1.5	5	0.818692	2
																																													1.7	9	0.422024	20
																																													1.7	9	0.236364	21
																																													1.7	9	0.258756	22
																																													1.7	9	0.783811	23
																																													1.7	9	0.598711	24
																																													1.7	9	0.408465	25
																																													1.8	3	0.674324	2
																																													1.5	5	0.756944	3
																																													1.8	3	0.682372	7
																																													1.8	3	0.573464	8
																																													1.8	3	0.568265	11
																																													1.8	3	0.364957	12
																																													1.8	3	0.698758	21
																																													1.8	4	0.674672	2
																																													1.8	4	0.388261	7
																																													1.8	4	0.378797	8
																																													1.8	4	0.514431	11
																																													1.8	4	0.315328	12
																																													1.8	4	0.467576	14
																																													1.8	4	0.477778	16
																																													1.5	5	0.725956	7
																																													1.8	4	0.518632	21
																																													1.8	5	0.469744	2
																																													1.8	5	0.406022	3
																																													1.8	5	0.612413	4
																																													1.5	5	0.462136	8
																																													1.8	5	0.542089	6
																																													1.8	5	0.375188	7
																																													1.8	5	0.319745	8
																																													1.8	5	0.548108	9
																																													1.8	5	0.49858	11
																																													1.8	5	0.26374	12
																																													1.8	5	0.758113	13
																																													1.8	5	0.300256	14
																																													1.8	5	0.454569	16
																																													1.8	5	0.412634	21
																																													1.8	5	0.675465	22
																																													1.8	5	0.610423	25
																																													1.8	6	0.430409	2
																																													1.8	6	0.394937	3
																																													1.8	6	0.420244	4
																																													1.8	6	0.545745	6
																																													1.8	6	0.368717	7
																																													1.8	6	0.291892	8
																																													1.8	6	0.500743	9
																																													1.8	6	0.837107	10
																																													1.8	6	0.439385	11
																																													1.8	6	0.260429	12
																																													1.8	6	0.507656	13
																																													1.8	6	0.26455	14
																																													1.8	6	0.569792	15
																																													1.8	6	0.3875	16
																																													1.8	6	0.471429	17
																																													1.8	6	0.516339	18
																																													1.8	6	0.414773	19
																																													1.5	5	0.352871	12
																																													1.8	6	0.464103	20
																																													1.8	6	0.335766	21
																																													1.8	6	0.275815	22
																																													1.8	6	0.566216	25
																																													1.8	7	0.601935	1
																																													1.8	7	0.405882	2
																																													1.8	7	0.381638	3
																																													1.8	7	0.387861	4
																																													1.8	7	0.502049	6
																																													1.8	7	0.332963	7
																																													1.8	7	0.25873	8
																																													1.8	7	0.29188	9
																																													1.8	7	0.409908	10
																																													1.8	7	0.428261	11
																																													1.8	7	0.241667	12
																																													1.8	7	0.501549	13
																																													1.8	7	0.253788	14
																																													1.5	5	0.415	14
																																													1.8	7	0.505799	15
																																													1.8	7	0.373196	16
																																													1.8	7	0.384836	17
																																													1.8	7	0.488614	18
																																													1.8	7	0.298246	19
																																													1.8	7	0.416062	20
																																													1.8	7	0.295909	21
																																													1.8	7	0.258685	22
																																													1.8	7	0.627644	23
																																													1.8	7	0.471012	25
																																													1.8	8	0.51314	1
																																													1.8	8	0.380503	2
																																													1.8	8	0.368029	3
																																													1.8	8	0.36725	4
																																													1.8	8	0.561168	5
																																													1.8	8	0.42907	6
																																													1.8	8	0.30733	7
																																													1.8	8	0.255462	8
																																													1.8	8	0.270175	9
																																													1.8	8	0.382895	10
																																													1.8	8	0.414463	11
																																													1.8	8	0.238764	12
																																													1.8	8	0.481845	13
																																													1.8	8	0.233	14
																																													1.8	8	0.364167	15
																																													1.8	8	0.363147	16
																																													1.8	8	0.301869	17
																																													1.8	8	0.41348	18
																																													1.8	8	0.254861	19
																																													1.8	8	0.412694	20
																																													1.8	8	0.241204	21
																																													1.8	8	0.254339	22
																																													1.8	8	0.587151	23
																																													1.8	8	0.636364	24
																																													1.8	8	0.417742	25
																																													1.8	9	0.369886	1
																																													1.8	9	0.297788	2
																																													1.8	9	0.354234	3
																																													1.8	9	0.305236	4
																																													1.8	9	0.4675	5
																																													1.8	9	0.385	6
																																													1.8	9	0.295588	7
																																													1.8	9	0.224359	8
																																													1.8	9	0.253318	9
																																													1.8	9	0.350599	10
																																													1.8	9	0.309762	11
																																													1.8	9	0.230417	12
																																													1.8	9	0.409794	13
																																													1.8	9	0.223125	14
																																													1.8	9	0.285769	15
																																													1.8	9	0.342373	16
																																													1.8	9	0.250602	17
																																													1.8	9	0.372789	18
																																													1.8	9	0.211562	19
																																													1.8	9	0.380723	20
																																													1.8	9	0.217568	21
																																													1.8	9	0.245669	22
																																													1.8	9	0.608935	23
																																													1.8	9	0.535	24
																																													1.8	9	0.377688	25
																																													1.9	3	0.607965	2
																																													1.9	3	0.566757	7
																																													1.9	3	0.506466	8
																																													1.9	3	0.667466	9
																																													1.5	5	0.935455	21
																																													1.9	3	0.492737	11
																																													1.9	3	0.341304	12
																																													1.9	3	0.647635	14
																																													1.9	3	0.601154	21
																																													1.9	3	0.741447	22
																																													1.9	4	0.605649	2
																																													1.9	4	0.550158	3
																																													1.9	4	0.701636	6
																																													1.9	4	0.347619	7
																																													1.9	4	0.342593	8
																																													1.9	4	0.630478	9
																																													1.9	4	0.470168	11
																																													1.9	4	0.301531	12
																																													1.9	4	0.389431	14
																																													1.9	4	0.423714	16
																																													1.9	4	0.605389	17
																																													1.9	4	0.432456	21
																																													1.9	4	0.69768	22
																																													1.9	4	0.756811	25
																																													1.9	5	0.406122	2
																																													1.9	5	0.375668	3
																																													1.9	5	0.471992	4
																																													1.9	5	0.441154	6
																																													1.9	5	0.338095	7
																																													1.9	5	0.2895	8
																																													1.9	5	0.45125	9
																																													1.9	5	0.4625	11
																																													1.9	5	0.251307	12
																																													1.9	5	0.523118	13
																																													1.9	5	0.274333	14
																																													1.9	5	0.551245	15
																																													1.9	5	0.411521	16
																																													1.9	5	0.550303	17
																																													1.9	5	0.6744	18
																																													1.9	5	0.760299	19
																																													1.5	6	0.711165	2
																																													1.9	5	0.919307	20
																																													1.9	5	0.375987	21
																																													1.9	5	0.487013	22
																																													1.9	5	0.790871	23
																																													1.9	5	0.514568	25
																																													1.9	6	0.700716	1
																																													1.9	6	0.388235	2
																																													1.9	6	0.362174	3
																																													1.9	6	0.377344	4
																																													1.5	6	0.586774	3
																																													1.9	6	0.437302	6
																																													1.9	6	0.334884	7
																																													1.9	6	0.268671	8
																																													1.9	6	0.43	9
																																													1.9	6	0.651404	10
																																													1.9	6	0.415134	11
																																													1.9	6	0.244444	12
																																													1.9	6	0.442276	13
																																													1.9	6	0.251339	14
																																													1.9	6	0.493353	15
																																													1.9	6	0.365962	16
																																													1.9	6	0.422039	17
																																													1.9	6	0.445588	18
																																													1.9	6	0.363991	19
																																													1.9	6	0.398065	20
																																													1.9	6	0.315649	21
																																													1.9	6	0.261194	22
																																													1.9	6	0.694972	23
																																													1.9	6	0.46032	25
																																													1.9	7	0.528537	1
																																													1.9	7	0.365988	2
																																													1.9	7	0.354562	3
																																													1.9	7	0.364815	4
																																													1.9	7	0.633929	5
																																													1.9	7	0.427083	6
																																													1.9	7	0.306857	7
																																													1.9	7	0.246759	8
																																													1.9	7	0.264828	9
																																													1.9	7	0.374679	10
																																													1.9	7	0.406631	11
																																													1.9	7	0.221875	12
																																													1.9	7	0.439695	13
																																													1.9	7	0.237407	14
																																													1.9	7	0.41599	15
																																													1.9	7	0.353213	16
																																													1.9	7	0.344954	17
																																													1.9	7	0.407759	18
																																													1.9	7	0.271714	19
																																													1.5	6	0.648039	7
																																													1.9	7	0.378652	20
																																													1.9	7	0.276042	21
																																													1.9	7	0.24693	22
																																													1.9	7	0.548571	23
																																													1.9	7	0.706695	24
																																													1.9	7	0.420332	25
																																													1.9	8	0.412304	1
																																													1.9	8	0.334024	2
																																													1.9	8	0.340333	3
																																													1.9	8	0.342806	4
																																													1.5	6	0.448201	8
																																													1.9	8	0.504803	5
																																													1.9	8	0.385315	6
																																													1.9	8	0.284322	7
																																													1.9	8	0.239604	8
																																													1.9	8	0.25	9
																																													1.9	8	0.357102	10
																																													1.9	8	0.38494	11
																																													1.9	8	0.222015	12
																																													1.9	8	0.428082	13
																																													1.9	8	0.220066	14
																																													1.9	8	0.325	15
																																													1.9	8	0.337153	16
																																													1.9	8	0.266518	17
																																													1.9	8	0.371667	18
																																													1.9	8	0.236726	19
																																													1.9	8	0.374855	20
																																													1.9	8	0.224545	21
																																													1.9	8	0.23855	22
																																													1.9	8	0.527128	23
																																													1.9	8	0.57109	24
																																													1.9	8	0.389571	25
																																													1.9	9	0.336093	1
																																													1.9	9	0.269186	2
																																													1.9	9	0.329781	3
																																													1.9	9	0.286913	4
																																													1.9	9	0.422167	5
																																													1.9	9	0.333459	6
																																													1.9	9	0.272951	7
																																													1.9	9	0.2135	8
																																													1.9	9	0.230859	9
																																													1.9	9	0.330851	10
																																													1.9	9	0.289908	11
																																													1.9	9	0.217045	12
																																													1.9	9	0.375316	13
																																													1.9	9	0.213584	14
																																													1.9	9	0.266794	15
																																													1.9	9	0.313859	16
																																													1.9	9	0.230303	17
																																													1.9	9	0.337895	18
																																													1.9	9	0.203941	19
																																													1.5	6	0.327239	12
																																													1.9	9	0.342771	20
																																													1.9	9	0.203896	21
																																													1.9	9	0.230645	22
																																													1.9	9	0.503947	23
																																													1.9	9	0.510959	24
																																													1.9	9	0.357008	25
																																													1.5	6	0.34125	14
																																													1.5	6	0.920415	16
																																													1.5	6	0.49812	21
																																													1.5	6	0.356466	22
																																													2	6	0.415957	25
																																													2	7	0.50074	1
																																													2	7	0.331522	2
																																													2	7	0.328723	3
																																													2	7	0.350202	4
																																													2	7	0.581905	5
																																													2	7	0.395909	6
																																													2	7	0.284071	7
																																													2	7	0.225342	8
																																													2	7	0.246552	9
																																													2	3	0.456494	11
																																													2	7	0.353234	10
																																													2	7	0.382595	11
																																													2	7	0.211905	12
																																													2	7	0.404645	13
																																													2	7	0.224046	14
																																													2	7	0.382979	15
																																													2	7	0.328378	16
																																													2	7	0.313699	17
																																													2	7	0.368421	18
																																													2	7	0.253571	19
																																													2	3	0.320803	12
																																													2	7	0.352404	20
																																													2	7	0.262183	21
																																													2	7	0.229882	22
																																													2	7	0.491367	23
																																													2	7	0.564419	24
																																													2	7	0.398344	25
																																													2	8	0.367662	1
																																													2	8	0.30684	2
																																													2	8	0.316818	3
																																													2	8	0.316954	4
																																													2	8	0.431667	5
																																													2	8	0.359309	6
																																													2	8	0.264286	7
																																													2	8	0.220238	8
																																													2	8	0.226056	9
																																													2	8	0.345	10
																																													2	8	0.363278	11
																																													2	8	0.212658	12
																																													2	8	0.404713	13
																																													2	8	0.210294	14
																																													2	3	0.520297	14
																																													2	8	0.305	15
																																													2	8	0.318718	16
																																													2	8	0.250521	17
																																													2	8	0.348851	18
																																													2	8	0.221429	19
																																													2	8	0.342667	20
																																													2	8	0.21014	21
																																													2	8	0.226286	22
																																													2	8	0.456471	23
																																													2	8	0.550893	24
																																													2	8	0.361686	25
																																													2	9	0.301263	1
																																													2	9	0.252525	2
																																													2	9	0.310331	3
																																													2	9	0.27013	4
																																													2	9	0.386824	5
																																													2	9	0.308092	6
																																													2	9	0.259032	7
																																													2	9	0.204709	8
																																													2	9	0.214145	9
																																													2	9	0.316667	10
																																													2	9	0.273986	11
																																													2	9	0.207862	12
																																													2	9	0.351316	13
																																													2	9	0.205357	14
																																													2	9	0.253086	15
																																													2	9	0.303469	16
																																													2	9	0.212313	17
																																													2	9	0.312975	18
																																													2	9	0.193043	19
																																													2	9	0.322194	20
																																													2	9	0.194828	21
																																													2	9	0.220958	22
																																													2	9	0.454245	23
																																													2	9	0.441711	24
																																													2	9	0.337086	25
																																													2.1	3	0.450186	2
																																													2.1	3	0.62202	3
																																													2.1	3	0.659694	4
																																													2	3	0.702174	18
																																													2.1	3	0.510099	6
																																													2.1	3	0.435145	7
																																													2.1	3	0.389493	8
																																													2.1	3	0.533168	9
																																													2.1	3	0.431481	11
																																													2.1	3	0.306145	12
																																													2.1	3	0.425316	14
																																													2.1	3	0.5075	15
																																													2.1	3	0.654255	18
																																													2.1	3	0.633784	20
																																													2.1	3	0.419207	21
																																													2.1	3	0.501147	22
																																													2	3	0.507173	2
																																													2.1	4	0.65753	1
																																													2.1	4	0.420833	2
																																													2.1	4	0.427376	3
																																													2.1	4	0.57178	4
																																													2.1	4	0.437956	6
																																													2.1	4	0.302446	7
																																													2.1	4	0.302444	8
																																													2.1	4	0.50931	9
																																													2	3	0.488365	21
																																													2.1	4	0.419856	11
																																													2.1	4	0.262925	12
																																													2.1	4	0.721915	13
																																													2.1	4	0.318831	14
																																													2.1	4	0.461435	15
																																													2.1	4	0.36875	16
																																													2.1	4	0.402564	17
																																													2.1	4	0.633415	18
																																													2.1	4	0.507724	19
																																													2	3	0.553927	22
																																													2.1	4	0.465764	20
																																													2.1	4	0.355814	21
																																													2.1	4	0.471429	22
																																													2.1	4	0.483488	25
																																													2.1	5	0.576444	1
																																													2.1	5	0.336522	2
																																													2.1	5	0.335849	3
																																													2.1	5	0.381016	4
																																													2.1	5	0.373567	6
																																													2.1	5	0.297753	7
																																													2.1	5	0.254884	8
																																													2.1	5	0.378395	9
																																													2.1	5	0.412766	11
																																													2.1	5	0.222951	12
																																													2.1	5	0.402817	13
																																													2.1	5	0.245635	14
																																													2.1	5	0.417056	15
																																													2.1	5	0.364823	16
																																													2.1	5	0.388073	17
																																													2.1	5	0.5525	18
																																													2.1	5	0.380952	19
																																													2.1	5	0.423214	20
																																													2.1	5	0.327823	21
																																													2.1	5	0.373485	22
																																													2.1	5	0.573698	23
																																													2.1	5	0.408235	25
																																													2.1	6	0.50798	1
																																													2.1	6	0.314213	2
																																													2.1	6	0.318925	3
																																													2.1	6	0.338489	4
																																													2.1	6	0.367376	6
																																													2.1	6	0.290196	7
																																													2.1	6	0.242523	8
																																													2.1	6	0.346903	9
																																													2.1	6	0.483235	10
																																													2.1	6	0.372162	11
																																													2.1	6	0.220922	12
																																													2.1	6	0.365414	13
																																													2.1	6	0.220186	14
																																													2.1	6	0.400186	15
																																													2.1	6	0.324107	16
																																													2.1	6	0.343056	17
																																													2.1	6	0.355742	18
																																													2.1	6	0.303241	19
																																													2	4	0.473101	2
																																													2.1	6	0.335311	20
																																													2.1	6	0.281308	21
																																													2.1	6	0.23609	22
																																													2.1	6	0.54	23
																																													2.1	6	0.628641	24
																																													2.1	6	0.386765	25
																																													2.1	7	0.42246	1
																																													2.1	7	0.304608	2
																																													2.1	7	0.309722	3
																																													2.1	7	0.324425	4
																																													2	4	0.479959	3
																																													2.1	7	0.481073	5
																																													2.1	7	0.363961	6
																																													2.1	7	0.265705	7
																																													2.1	7	0.214689	8
																																													2.1	7	0.224632	9
																																													2.1	7	0.333197	10
																																													2.1	7	0.359592	11
																																													2.1	7	0.202885	12
																																													2.1	7	0.369799	13
																																													2.1	7	0.213859	14
																																													2	4	0.623307	4
																																													2.1	7	0.359179	15
																																													2.1	7	0.314524	16
																																													2.1	7	0.292647	17
																																													2.1	7	0.343627	18
																																													2.1	7	0.234052	19
																																													2.1	7	0.328931	20
																																													2.1	7	0.246277	21
																																													2.1	7	0.220175	22
																																													2.1	7	0.4375	23
																																													2.1	7	0.530556	24
																																													2.1	7	0.363559	25
																																													2.1	8	0.329193	1
																																													2.1	8	0.277211	2
																																													2.1	8	0.301333	3
																																													2.1	8	0.30393	4
																																													2.1	8	0.402966	5
																																													2.1	8	0.328968	6
																																													2.1	8	0.256461	7
																																													2.1	8	0.21125	8
																																													2.1	8	0.213202	9
																																													2	4	0.521579	6
																																													2.1	8	0.324324	10
																																													2.1	8	0.349194	11
																																													2.1	8	0.202813	12
																																													2.1	8	0.364368	13
																																													2.1	8	0.204951	14
																																													2.1	8	0.286058	15
																																													2.1	8	0.306039	16
																																													2.1	8	0.228899	17
																																													2.1	8	0.3216	18
																																													2.1	8	0.21213	19
																																													2	4	0.318	7
																																													2.1	8	0.321296	20
																																													2.1	8	0.200299	21
																																													2.1	8	0.215363	22
																																													2.1	8	0.423967	23
																																													2.1	8	0.474096	24
																																													2.1	8	0.343254	25
																																													2.1	9	0.278125	1
																																													2.1	9	0.233471	2
																																													2.1	9	0.288014	3
																																													2.1	9	0.255556	4
																																													2	4	0.316084	8
																																													2.1	9	0.365128	5
																																													2.1	9	0.280769	6
																																													2.1	9	0.245732	7
																																													2.1	9	0.192308	8
																																													2.1	9	0.205122	9
																																													2.1	9	0.305966	10
																																													2.1	9	0.261471	11
																																													2.1	9	0.201058	12
																																													2.1	9	0.326953	13
																																													2.1	9	0.197561	14
																																													2	4	0.550812	9
																																													2.1	9	0.237395	15
																																													2.1	9	0.284328	16
																																													2.1	9	0.206897	17
																																													2.1	9	0.295755	18
																																													2.1	9	0.180345	19
																																													2.1	9	0.309048	20
																																													2.1	9	0.183942	21
																																													2.1	9	0.212842	22
																																													2.1	9	0.419128	23
																																													2.1	9	0.418325	24
																																													2.1	9	0.316667	25
																																													2.2	3	0.411979	2
																																													2.2	3	0.512898	3
																																													2.2	3	0.620677	4
																																													2.2	3	0.456915	6
																																													2.2	3	0.411224	7
																																													2.2	3	0.361502	8
																																													2.2	3	0.506491	9
																																													2	4	0.444771	11
																																													2.2	3	0.412277	11
																																													2.2	3	0.285784	12
																																													2.2	3	0.389024	14
																																													2.2	3	0.454444	15
																																													2.2	3	0.544554	16
																																													2.2	3	0.604313	18
																																													2	4	0.278571	12
																																													2.2	3	0.478882	20
																																													2.2	3	0.361832	21
																																													2.2	3	0.463409	22
																																													2.2	3	0.713249	25
																																													2.2	4	0.521163	1
																																													2.2	4	0.389	2
																																													2.2	4	0.402189	3
																																													2.2	4	0.536364	4
																																													2.2	4	0.413603	6
																																													2.2	4	0.281532	7
																																													2.2	4	0.280672	8
																																													2.2	4	0.465524	9
																																													2.2	4	0.403909	11
																																													2.2	4	0.247807	12
																																													2.2	4	0.537037	13
																																													2.2	4	0.301344	14
																																													2	4	0.356522	14
																																													2.2	4	0.413218	15
																																													2.2	4	0.355118	16
																																													2.2	4	0.3625	17
																																													2.2	4	0.569444	18
																																													2.2	4	0.413942	19
																																													2.2	4	0.420055	20
																																													2.2	4	0.334483	21
																																													2.2	4	0.428818	22
																																													2.2	4	0.650683	23
																																													2	4	0.580905	15
																																													2.2	4	0.443258	25
																																													2.2	5	0.506159	1
																																													2.2	5	0.30671	2
																																													2.2	5	0.320492	3
																																													2.2	5	0.359211	4
																																													2.2	5	0.345902	6
																																													2.2	5	0.276894	7
																																													2.2	5	0.236574	8
																																													2.2	5	0.359649	9
																																													2	4	0.397388	16
																																													2.2	5	0.392466	11
																																													2.2	5	0.215101	12
																																													2.2	5	0.363665	13
																																													2.2	5	0.22947	14
																																													2.2	5	0.382432	15
																																													2.2	5	0.353435	16
																																													2.2	5	0.353385	17
																																													2.2	5	0.459071	18
																																													2.2	5	0.338037	19
																																													2	4	0.446875	17
																																													2.2	5	0.370541	20
																																													2.2	5	0.31142	21
																																													2.2	5	0.346053	22
																																													2.2	5	0.519492	23
																																													2.2	5	0.715465	24
																																													2.2	5	0.382713	25
																																													2.2	6	0.440123	1
																																													2.2	6	0.293333	2
																																													2.2	6	0.304762	3
																																													2.2	6	0.322727	4
																																													2	4	0.671507	18
																																													2.2	6	0.3416	6
																																													2.2	6	0.271986	7
																																													2.2	6	0.226667	8
																																													2.2	6	0.302313	9
																																													2.2	6	0.452754	10
																																													2.2	6	0.355273	11
																																													2.2	6	0.210403	12
																																													2.2	6	0.350679	13
																																													2.2	6	0.209239	14
																																													2.2	6	0.367914	15
																																													2.2	6	0.311927	16
																																													2.2	6	0.316319	17
																																													2.2	6	0.328155	18
																																													2.2	6	0.276923	19
																																													2.2	6	0.319602	20
																																													2.2	6	0.262879	21
																																													2.2	6	0.225	22
																																													2.2	6	0.500187	23
																																													2.2	6	0.542284	24
																																													2.2	6	0.363241	25
																																													2.2	7	0.363736	1
																																													2.2	7	0.278571	2
																																													2.2	7	0.293388	3
																																													2.2	7	0.309217	4
																																													2.2	7	0.457655	5
																																													2.2	7	0.34009	6
																																													2.2	7	0.253779	7
																																													2.2	7	0.206553	8
																																													2.2	7	0.213272	9
																																													2	4	0.395631	21
																																													2.2	7	0.318678	10
																																													2.2	7	0.342657	11
																																													2.2	7	0.200704	12
																																													2.2	7	0.352212	13
																																													2.2	7	0.20599	14
																																													2.2	7	0.340598	15
																																													2.2	7	0.305686	16
																																													2.2	7	0.27	17
																																													2.2	7	0.318699	18
																																													2.2	7	0.221523	19
																																													2	4	0.528857	22
																																													2.2	7	0.31435	20
																																													2.2	7	0.227928	21
																																													2.2	7	0.212772	22
																																													2.2	7	0.401538	23
																																													2.2	7	0.469505	24
																																													2.2	7	0.346429	25
																																													2.2	8	0.305747	1
																																													2.2	8	0.26164	2
																																													2.2	8	0.279012	3
																																													2.2	8	0.29188	4
																																													2.2	8	0.378571	5
																																													2.2	8	0.308276	6
																																													2.2	8	0.240132	7
																																													2.2	8	0.202941	8
																																													2.2	8	0.202913	9
																																													2.2	8	0.311377	10
																																													2.2	8	0.328485	11
																																													2.2	8	0.194882	12
																																													2.2	8	0.346465	13
																																													2.2	8	0.195455	14
																																													2.2	8	0.27437	15
																																													2.2	8	0.292647	16
																																													2.2	8	0.216	17
																																													2.2	8	0.306536	18
																																													2.2	8	0.203763	19
																																													2.2	8	0.308654	20
																																													2.2	8	0.191844	21
																																													2.2	8	0.208242	22
																																													2.2	8	0.390476	23
																																													2.2	8	0.453101	24
																																													2	4	0.558711	25
																																													2.2	8	0.321598	25
																																													2.2	9	0.263218	1
																																													2.2	9	0.22125	2
																																													2.2	9	0.270166	3
																																													2.2	9	0.245312	4
																																													2.2	9	0.350641	5
																																													2.2	9	0.264423	6
																																													2.2	9	0.226842	7
																																													2.2	9	0.183613	8
																																													2.2	9	0.200593	9
																																													2.2	9	0.293	10
																																													2.2	9	0.248864	11
																																													2.2	9	0.1876	12
																																													2.2	9	0.309167	13
																																													2.2	9	0.185156	14
																																													2.2	9	0.225221	15
																																													2.2	9	0.270186	16
																																													2.2	9	0.191827	17
																																													2.2	9	0.2775	18
																																													2.2	9	0.173684	19
																																													2	5	0.364671	2
																																													2.2	9	0.285556	20
																																													2.2	9	0.177852	21
																																													2.2	9	0.20575	22
																																													2.2	9	0.382759	23
																																													2.2	9	0.402041	24
																																													2.2	9	0.30413	25
																																													2.3	3	0.3792	2
																																													2.3	3	0.421136	3
																																													2.3	3	0.596944	4
																																													2	5	0.356818	3
																																													2.3	3	0.423311	6
																																													2.3	3	0.39065	7
																																													2.3	3	0.332374	8
																																													2.3	3	0.468122	9
																																													2.3	3	0.400196	11
																																													2.3	3	0.268797	12
																																													2.3	3	0.920994	13
																																													2.3	3	0.36236	14
																																													2	5	0.41753	4
																																													2.3	3	0.416871	15
																																													2.3	3	0.458434	16
																																													2.3	3	0.562826	18
																																													2.3	3	0.434667	20
																																													2.3	3	0.343023	21
																																													2.3	3	0.417797	22
																																													2.3	3	0.673109	23
																																													2.3	3	0.651879	25
																																													2.3	4	0.489687	1
																																													2.3	4	0.352252	2
																																													2.3	4	0.379211	3
																																													2.3	4	0.511832	4
																																													2.3	4	0.384615	6
																																													2.3	4	0.266418	7
																																													2.3	4	0.264931	8
																																													2.3	4	0.43871	9
																																													2	5	0.405455	6
																																													2.3	4	0.661462	10
																																													2.3	4	0.380675	11
																																													2.3	4	0.235185	12
																																													2.3	4	0.444196	13
																																													2.3	4	0.284	14
																																													2.3	4	0.382847	15
																																													2.3	4	0.338851	16
																																													2.3	4	0.337879	17
																																													2.3	4	0.538308	18
																																													2.3	4	0.371	19
																																													2	5	0.316193	7
																																													2.3	4	0.393493	20
																																													2.3	4	0.31526	21
																																													2.3	4	0.383533	22
																																													2.3	4	0.546454	23
																																													2.3	4	0.411776	25
																																													2.3	5	0.451301	1
																																													2.3	5	0.282168	2
																																													2.3	5	0.307282	3
																																													2.3	5	0.342763	4
																																													2	5	0.265031	8
																																													2.3	5	0.625	5
																																													2.3	5	0.325	6
																																													2.3	5	0.263433	7
																																													2.3	5	0.221739	8
																																													2.3	5	0.318785	9
																																													2.3	5	0.65	10
																																													2.3	5	0.369231	11
																																													2.3	5	0.207099	12
																																													2.3	5	0.343689	13
																																													2.3	5	0.217251	14
																																													2	5	0.414062	9
																																													2.3	5	0.361765	15
																																													2.3	5	0.335563	16
																																													2.3	5	0.327928	17
																																													2.3	5	0.415942	18
																																													2.3	5	0.309111	19
																																													2.3	5	0.341111	20
																																													2.3	5	0.300917	21
																																													2.3	5	0.316959	22
																																													2.3	5	0.481419	23
																																													2.3	5	0.538736	24
																																													2.3	5	0.361983	25
																																													2.3	6	0.390741	1
																																													2.3	6	0.268987	2
																																													2.3	6	0.286331	3
																																													2.3	6	0.306335	4
																																													2.3	6	0.604066	5
																																													2.3	6	0.320205	6
																																													2.3	6	0.260191	7
																																													2.3	6	0.214179	8
																																													2.3	6	0.269876	9
																																													2	5	0.433065	11
																																													2.3	6	0.42561	10
																																													2.3	6	0.336458	11
																																													2.3	6	0.204624	12
																																													2.3	6	0.31875	13
																																													2.3	6	0.205991	14
																																													2.3	6	0.351389	15
																																													2.3	6	0.301938	16
																																													2.3	6	0.302304	17
																																													2.3	6	0.313393	18
																																													2.3	6	0.262209	19
																																													2	5	0.236916	12
																																													2.3	6	0.305529	20
																																													2.3	6	0.251538	21
																																													2.3	6	0.217	22
																																													2.3	6	0.464516	23
																																													2.3	6	0.481316	24
																																													2.3	6	0.347034	25
																																													2.3	7	0.324516	1
																																													2.3	7	0.261719	2
																																													2.3	7	0.277673	3
																																													2.3	7	0.299038	4
																																													2	5	0.447345	13
																																													2.3	7	0.43366	5
																																													2.3	7	0.314453	6
																																													2.3	7	0.239103	7
																																													2.3	7	0.199091	8
																																													2.3	7	0.204278	9
																																													2.3	7	0.307602	10
																																													2.3	7	0.324183	11
																																													2.3	7	0.185985	12
																																													2.3	7	0.318966	13
																																													2.3	7	0.201116	14
																																													2	5	0.259048	14
																																													2.3	7	0.321379	15
																																													2.3	7	0.289837	16
																																													2.3	7	0.255	17
																																													2.3	7	0.308333	18
																																													2.3	7	0.213314	19
																																													2.3	7	0.296	20
																																													2.3	7	0.214599	21
																																													2.3	7	0.20544	22
																																													2.3	7	0.373734	23
																																													2.3	7	0.44026	24
																																													2	5	0.496	15
																																													2.3	7	0.324269	25
																																													2.3	8	0.284836	1
																																													2.3	8	0.242982	2
																																													2.3	8	0.264356	3
																																													2.3	8	0.277481	4
																																													2.3	8	0.363913	5
																																													2.3	8	0.285776	6
																																													2.3	8	0.223077	7
																																													2.3	8	0.194545	8
																																													2.3	8	0.197561	9
																																													2	5	0.383989	16
																																													2.3	8	0.301531	10
																																													2.3	8	0.309744	11
																																													2.3	8	0.184783	12
																																													2.3	8	0.316667	13
																																													2.3	8	0.185075	14
																																													2.3	8	0.262205	15
																																													2.3	8	0.284	16
																																													2.3	8	0.205822	17
																																													2.3	8	0.292778	18
																																													2.3	8	0.192035	19
																																													2	5	0.4375	17
																																													2.3	8	0.288189	20
																																													2.3	8	0.182143	21
																																													2.3	8	0.203687	22
																																													2.3	8	0.366667	23
																																													2.3	8	0.431847	24
																																													2.3	8	0.308225	25
																																													2.3	9	0.25175	1
																																													2.3	9	0.20814	2
																																													2.3	9	0.257547	3
																																													2.3	9	0.229924	4
																																													2	5	0.589011	18
																																													2.3	9	0.33156	5
																																													2.3	9	0.251634	6
																																													2.3	9	0.218182	7
																																													2.3	9	0.17439	8
																																													2.3	9	0.183019	9
																																													2.3	9	0.270161	10
																																													2.3	9	0.233772	11
																																													2.3	9	0.180734	12
																																													2.3	9	0.292262	13
																																													2.3	9	0.180328	14
																																													2	5	0.448101	19
																																													2.3	9	0.214113	15
																																													2.3	9	0.25994	16
																																													2.3	9	0.182857	17
																																													2.3	9	0.258678	18
																																													2.3	9	0.165132	19
																																													2.3	9	0.271382	20
																																													2.3	9	0.167702	21
																																													2.3	9	0.1965	22
																																													2.3	9	0.362575	23
																																													2.3	9	0.385492	24
																																													2	3	0.486364	7
																																													2	5	0.654971	20
																																													2.3	9	0.289252	25
																																													2.4	3	0.354469	2
																																													2.4	3	0.393103	3
																																													2.4	3	0.568266	4
																																													2.4	3	0.402895	6
																																													2.4	3	0.372789	7
																																													2.4	3	0.317598	8
																																													2.4	3	0.444615	9
																																													2	5	0.355102	21
																																													2.4	3	0.379221	11
																																													2.4	3	0.259247	12
																																													2.4	3	0.612617	13
																																													2.4	3	0.345146	14
																																													2.4	3	0.378671	15
																																													2.4	3	0.406281	16
																																													2.4	3	0.528065	17
																																													2.4	3	0.502321	18
																																													2.4	3	0.422115	19
																																													2	5	0.423724	22
																																													2.4	3	0.408597	20
																																													2.4	3	0.318293	21
																																													2.4	3	0.373858	22
																																													2.4	3	0.609328	23
																																													2.4	3	0.618723	25
																																													2.4	4	0.454915	1
																																													2.4	4	0.314545	2
																																													2.4	4	0.359779	3
																																													2.4	4	0.489607	4
																																													2	5	0.644545	23
																																													2.4	4	0.362264	6
																																													2.4	4	0.258282	7
																																													2.4	4	0.256684	8
																																													2.4	4	0.403516	9
																																													2.4	4	0.609446	10
																																													2.4	4	0.364384	11
																																													2.4	4	0.223874	12
																																													2.4	4	0.4125	13
																																													2.4	4	0.264961	14
																																													2.4	4	0.359545	15
																																													2.4	4	0.326647	16
																																													2.4	4	0.316296	17
																																													2.4	4	0.454208	18
																																													2.4	4	0.327273	19
																																													2.4	4	0.367988	20
																																													2.4	4	0.302809	21
																																													2.4	4	0.358072	22
																																													2.4	4	0.488652	23
																																													2	5	0.442353	25
																																													2.4	4	0.388304	25
																																													2.4	5	0.407399	1
																																													2.4	5	0.261561	2
																																													2.4	5	0.300382	3
																																													2.4	5	0.325926	4
																																													2.4	5	0.590426	5
																																													2.4	5	0.303548	6
																																													2.4	5	0.255422	7
																																													2.4	5	0.211852	8
																																													2.4	5	0.298958	9
																																													2	6	0.576569	1
																																													2.4	5	0.597076	10
																																													2.4	5	0.356548	11
																																													2.4	5	0.202835	12
																																													2.4	5	0.315086	13
																																													2.4	5	0.209593	14
																																													2.4	5	0.350973	15
																																													2.4	5	0.323476	16
																																													2.4	5	0.311935	17
																																													2.4	5	0.395536	18
																																													2.4	5	0.284375	19
																																													2	6	0.3525	2
																																													2.4	5	0.318207	20
																																													2.4	5	0.278333	21
																																													2.4	5	0.306198	22
																																													2.4	5	0.453265	23
																																													2.4	5	0.472811	24
																																													2.4	5	0.347674	25
																																													2.4	6	0.3506	1
																																													2.4	6	0.257857	2
																																													2.4	6	0.275161	3
																																													2.4	6	0.295909	4
																																													2	6	0.342053	3
																																													2.4	6	0.565714	5
																																													2.4	6	0.297248	6
																																													2.4	6	0.250281	7
																																													2.4	6	0.208919	8
																																													2.4	6	0.257576	9
																																													2.4	6	0.406388	10
																																													2.4	6	0.322642	11
																																													2.4	6	0.197015	12
																																													2.4	6	0.303757	13
																																													2.4	6	0.197443	14
																																													2	6	0.356278	4
																																													2.4	6	0.33156	15
																																													2.4	6	0.286364	16
																																													2.4	6	0.277459	17
																																													2.4	6	0.299474	18
																																													2.4	6	0.252715	19
																																													2.4	6	0.29009	20
																																													2.4	6	0.231959	21
																																													2.4	6	0.20984	22
																																													2.4	6	0.431034	23
																																													2.4	6	0.450226	24
																																													2	3	0.437	8
																																													2.4	6	0.327019	25
																																													2.4	7	0.300513	1
																																													2.4	7	0.250682	2
																																													2.4	7	0.265714	3
																																													2.4	7	0.282377	4
																																													2.4	7	0.414461	5
																																													2.4	7	0.29697	6
																																													2.4	7	0.222059	7
																																													2.4	7	0.191919	8
																																													2.4	7	0.195283	9
																																													2	6	0.401966	6
																																													2.4	7	0.3	10
																																													2.4	7	0.308974	11
																																													2.4	7	0.180081	12
																																													2.4	7	0.307179	13
																																													2.4	7	0.190179	14
																																													2.4	7	0.310947	15
																																													2.4	7	0.279	16
																																													2.4	7	0.247297	17
																																													2.4	7	0.292771	18
																																													2.4	7	0.205738	19
																																													2	6	0.309524	7
																																													2.4	7	0.276667	20
																																													2.4	7	0.205455	21
																																													2.4	7	0.201883	22
																																													2.4	7	0.351479	23
																																													2.4	7	0.425132	24
																																													2.4	7	0.311826	25
																																													2.4	8	0.270588	1
																																													2.4	8	0.227239	2
																																													2.4	8	0.254338	3
																																													2.4	8	0.264848	4
																																													2	6	0.255208	8
																																													2.4	8	0.344904	5
																																													2.4	8	0.271753	6
																																													2.4	8	0.215217	7
																																													2.4	8	0.187143	8
																																													2.4	8	0.182692	9
																																													2.4	8	0.287383	10
																																													2.4	8	0.295339	11
																																													2.4	8	0.178689	12
																																													2.4	8	0.304121	13
																																													2.4	8	0.179496	14
																																													2	6	0.385855	9
																																													2.4	8	0.257095	15
																																													2.4	8	0.271724	16
																																													2.4	8	0.194196	17
																																													2.4	8	0.272778	18
																																													2.4	8	0.182937	19
																																													2.4	8	0.271296	20
																																													2.4	8	0.178049	21
																																													2.4	8	0.194022	22
																																													2.4	8	0.344958	23
																																													2.4	8	0.417857	24
																																													2	6	0.532195	10
																																													2.4	8	0.298624	25
																																													2.4	9	0.234951	1
																																													2.4	9	0.19899	2
																																													2.4	9	0.251383	3
																																													2.4	9	0.219512	4
																																													2.4	9	0.315758	5
																																													2.4	9	0.235165	6
																																													2.4	9	0.209191	7
																																													2.4	9	0.167483	8
																																													2.4	9	0.1735	9
																																													2	6	0.400487	11
																																													2.4	9	0.260853	10
																																													2.4	9	0.221121	11
																																													2.4	9	0.174206	12
																																													2.4	9	0.274138	13
																																													2.4	9	0.172436	14
																																													2.4	9	0.212202	15
																																													2.4	9	0.250829	16
																																													2.4	9	0.173529	17
																																													2.4	9	0.248058	18
																																													2.4	9	0.161465	19
																																													2	6	0.229439	12
																																													2.4	9	0.25977	20
																																													2.4	9	0.161709	21
																																													2.4	9	0.195402	22
																																													2.4	9	0.337692	23
																																													2.4	9	0.367805	24
																																													2.4	9	0.277273	25
																																													2	6	0.404225	13
																																													2	6	0.23125	14
																																													2	3	0.583816	9
																																													2	6	0.448276	15
																																													2	6	0.34876	16
																																													2	6	0.368478	17
																																													2	6	0.398529	18
																																													2	6	0.328378	19
																																													2	6	0.365691	20
																																													2	6	0.302394	21
																																													2	6	0.247107	22
																																													2	6	0.613843	23
																																													2.5	3	0.57459	1
																																													2.5	6	0.310106	25
																																													2.5	7	0.280841	1
																																													2.5	7	0.228862	2
																																													2.5	7	0.254976	3
																																													2.5	7	0.273381	4
																																													2.5	7	0.397426	5
																																													2.5	7	0.275	6
																																													2.5	7	0.210976	7
																																													2.5	7	0.181855	8
																																													2.5	7	0.186792	9
																																													2.5	3	0.364286	11
																																													2.5	7	0.282589	10
																																													2.5	7	0.290244	11
																																													2.5	7	0.170455	12
																																													2.5	7	0.295213	13
																																													2.5	7	0.183987	14
																																													2.5	7	0.297895	15
																																													2.5	7	0.265132	16
																																													2.5	7	0.230729	17
																																													2.5	7	0.272165	18
																																													2.5	7	0.19902	19
																																													2.5	3	0.247771	12
																																													2.5	7	0.265506	20
																																													2.5	7	0.19685	21
																																													2.5	7	0.187745	22
																																													2.5	7	0.333206	23
																																													2.5	7	0.414541	24
																																													2.5	7	0.300781	25
																																													2.5	8	0.257225	1
																																													2.5	8	0.216452	2
																																													2.5	8	0.241905	3
																																													2.5	8	0.25791	4
																																													2.5	3	0.556481	13
																																													2.5	8	0.330822	5
																																													2.5	8	0.25748	6
																																													2.5	8	0.203488	7
																																													2.5	8	0.175	8
																																													2.5	8	0.174742	9
																																													2.5	8	0.27605	10
																																													2.5	8	0.278571	11
																																													2.5	8	0.170588	12
																																													2.5	8	0.297436	13
																																													2.5	8	0.173973	14
																																													2.5	3	0.322701	14
																																													2.5	8	0.240341	15
																																													2.5	8	0.260256	16
																																													2.5	8	0.187	17
																																													2.5	8	0.258678	18
																																													2.5	8	0.178261	19
																																													2.5	8	0.258721	20
																																													2.5	8	0.169408	21
																																													2.5	8	0.185294	22
																																													2.5	8	0.323973	23
																																													2.5	8	0.392414	24
																																													2.5	3	0.360238	15
																																													2.5	8	0.281716	25
																																													2.5	9	0.218939	1
																																													2.5	9	0.185039	2
																																													2.5	9	0.234821	3
																																													2.5	9	0.211268	4
																																													2.5	9	0.306992	5
																																													2.5	9	0.222727	6
																																													2.5	9	0.205732	7
																																													2.5	9	0.160588	8
																																													2.5	9	0.167883	9
																																													2.5	3	0.376408	16
																																													2.5	9	0.251563	10
																																													2.5	9	0.215074	11
																																													2.5	9	0.166923	12
																																													2.5	9	0.263214	13
																																													2.5	9	0.166883	14
																																													2.5	9	0.201974	15
																																													2.5	9	0.250667	16
																																													2.5	9	0.165873	17
																																													2.5	9	0.236842	18
																																													2.5	9	0.157027	19
																																													2.5	3	0.490152	17
																																													2.5	9	0.252123	20
																																													2.5	9	0.157838	21
																																													2.5	9	0.182857	22
																																													2.5	9	0.316892	23
																																													2.5	9	0.355921	24
																																													2.5	9	0.265411	25
																																													2.7	3	0.470122	1
																																													2.7	3	0.305707	2
																																													2.7	3	0.335443	3
																																													2.7	3	0.504878	4
																																													2.5	3	0.443462	18
																																													2.7	3	0.63014	5
																																													2.7	3	0.332624	6
																																													2.7	3	0.32449	7
																																													2.7	3	0.276106	8
																																													2.7	3	0.342609	9
																																													2.7	3	0.584195	10
																																													2.7	3	0.346277	11
																																													2.7	3	0.22439	12
																																													2.7	3	0.505357	13
																																													2.7	3	0.292	14
																																													2.5	3	0.359031	19
																																													2.7	3	0.320395	15
																																													2.7	3	0.351802	16
																																													2.7	3	0.4175	17
																																													2.7	3	0.390726	18
																																													2.7	3	0.304803	19
																																													2.7	3	0.349174	20
																																													2.7	3	0.277523	21
																																													2.7	3	0.307108	22
																																													2.7	3	0.474855	23
																																													2.7	3	0.782489	24
																																													2.5	3	0.332627	2
																																													2.5	3	0.379856	20
																																													2.7	3	0.478611	25
																																													2.7	4	0.37037	1
																																													2.7	4	0.262874	2
																																													2.7	4	0.316667	3
																																													2.7	4	0.415816	4
																																													2.7	4	0.586682	5
																																													2.7	4	0.301705	6
																																													2.7	4	0.222816	7
																																													2.7	4	0.222426	8
																																													2.7	4	0.300388	9
																																													2.5	3	0.304196	21
																																													2.7	4	0.487209	10
																																													2.7	4	0.318557	11
																																													2.7	4	0.203533	12
																																													2.7	4	0.358376	13
																																													2.7	4	0.229615	14
																																													2.7	4	0.31117	15
																																													2.7	4	0.300398	16
																																													2.7	4	0.275521	17
																																													2.7	4	0.377899	18
																																													2.7	4	0.256593	19
																																													2.5	3	0.34918	22
																																													2.7	4	0.318836	20
																																													2.7	4	0.26227	21
																																													2.7	4	0.301382	22
																																													2.7	4	0.403957	23
																																													2.7	4	0.899262	24
																																													2.7	4	0.335849	25
																																													2.7	5	0.317614	1
																																													2.7	5	0.221481	2
																																													2.7	5	0.265313	3
																																													2.7	5	0.287218	4
																																													2.5	3	0.55014	23
																																													2.7	5	0.515353	5
																																													2.7	5	0.259459	6
																																													2.7	5	0.218269	7
																																													2.7	5	0.193694	8
																																													2.7	5	0.250263	9
																																													2.7	5	0.480328	10
																																													2.7	5	0.309112	11
																																													2.7	5	0.180556	12
																																													2.7	5	0.275625	13
																																													2.7	5	0.191099	14
																																													2.7	5	0.304121	15
																																													2.7	5	0.297449	16
																																													2.7	5	0.266667	17
																																													2.7	5	0.341949	18
																																													2.7	5	0.249405	19
																																													2.7	5	0.271935	20
																																													2.7	5	0.235789	21
																																													2.7	5	0.259538	22
																																													2.7	5	0.387288	23
																																													2.7	5	0.406928	24
																																													2.5	3	0.544898	25
																																													2.7	5	0.302245	25
																																													2.7	6	0.282203	1
																																													2.7	6	0.214516	2
																																													2.7	6	0.244578	3
																																													2.7	6	0.260645	4
																																													2.7	6	0.503512	5
																																													2.7	6	0.25471	6
																																													2.7	6	0.213333	7
																																													2.7	6	0.187727	8
																																													2.7	6	0.215789	9
																																													2.5	4	0.417598	1
																																													2.7	6	0.355689	10
																																													2.7	6	0.277099	11
																																													2.7	6	0.176953	12
																																													2.7	6	0.268217	13
																																													2.7	6	0.177597	14
																																													2.7	6	0.300858	15
																																													2.7	6	0.259893	16
																																													2.7	6	0.236842	17
																																													2.7	6	0.255705	18
																																													2.7	6	0.220068	19
																																													2.5	4	0.303427	2
																																													2.7	6	0.251823	20
																																													2.7	6	0.20292	21
																																													2.7	6	0.190526	22
																																													2.7	6	0.372426	23
																																													2.7	6	0.396617	24
																																													2.7	6	0.287727	25
																																													2.7	7	0.247647	1
																																													2.7	7	0.206395	2
																																													2.7	7	0.23211	3
																																													2.7	7	0.256684	4
																																													2.5	4	0.344366	3
																																													2.7	7	0.370109	5
																																													2.7	7	0.257714	6
																																													2.7	7	0.196667	7
																																													2.7	7	0.168212	8
																																													2.7	7	0.168605	9
																																													2.7	7	0.265504	10
																																													2.7	7	0.264465	11
																																													2.7	7	0.161765	12
																																													2.7	7	0.271374	13
																																													2.7	7	0.172581	14
																																													2.5	4	0.466527	4
																																													2.7	7	0.270982	15
																																													2.7	7	0.254587	16
																																													2.7	7	0.205785	17
																																													2.7	7	0.253822	18
																																													2.7	7	0.183168	19
																																													2.7	7	0.250211	20
																																													2.7	7	0.182031	21
																																													2.7	7	0.174576	22
																																													2.7	7	0.30221	23
																																													2.7	7	0.384559	24
																																													2.5	3	0.364655	3
																																													2.5	4	0.881875	5
																																													2.7	7	0.277365	25
																																													2.7	8	0.23172	1
																																													2.7	8	0.196262	2
																																													2.7	8	0.221212	3
																																													2.7	8	0.233913	4
																																													2.7	8	0.308192	5
																																													2.7	8	0.236979	6
																																													2.7	8	0.188971	7
																																													2.7	8	0.164826	8
																																													2.7	8	0.163141	9
																																													2.5	4	0.333784	6
																																													2.7	8	0.257955	10
																																													2.7	8	0.25838	11
																																													2.7	8	0.160191	12
																																													2.7	8	0.267293	13
																																													2.7	8	0.162571	14
																																													2.7	8	0.225688	15
																																													2.7	8	0.247475	16
																																													2.7	8	0.170093	17
																																													2.7	8	0.239412	18
																																													2.7	8	0.163636	19
																																													2.5	4	0.250524	7
																																													2.7	8	0.23381	20
																																													2.7	8	0.158133	21
																																													2.7	8	0.173214	22
																																													2.7	8	0.292778	23
																																													2.7	8	0.366667	24
																																													2.7	8	0.264	25
																																													2.7	9	0.205615	1
																																													2.7	9	0.170588	2
																																													2.7	9	0.213636	3
																																													2.7	9	0.20026	4
																																													2.5	4	0.244681	8
																																													2.7	9	0.284188	5
																																													2.7	9	0.204762	6
																																													2.7	9	0.185256	7
																																													2.7	9	0.15266	8
																																													2.7	9	0.156522	9
																																													2.7	9	0.233133	10
																																													2.7	9	0.201543	11
																																													2.7	9	0.156863	12
																																													2.7	9	0.250488	13
																																													2.7	9	0.158989	14
																																													2.5	4	0.34958	9
																																													2.7	9	0.190385	15
																																													2.7	9	0.223551	16
																																													2.7	9	0.156209	17
																																													2.7	9	0.217857	18
																																													2.7	9	0.148084	19
																																													2.7	9	0.223387	20
																																													2.7	9	0.149336	21
																																													2.7	9	0.169922	22
																																													2.7	9	0.288211	23
																																													2.7	9	0.331845	24
																																													2.5	4	0.555802	10
																																													2.7	9	0.250802	25
																																													2.9	3	0.408434	1
																																													2.9	3	0.278061	2
																																													2.9	3	0.312903	3
																																													2.9	3	0.476301	4
																																													2.9	3	0.555458	5
																																													2.9	3	0.302459	6
																																													2.9	3	0.300254	7
																																													2.9	3	0.257911	8
																																													2.9	3	0.290404	9
																																													2.5	4	0.352033	11
																																													2.9	3	0.520872	10
																																													2.9	3	0.312694	11
																																													2.9	3	0.209091	12
																																													2.9	3	0.45131	13
																																													2.9	3	0.263253	14
																																													2.9	3	0.30197	15
																																													2.9	3	0.32651	16
																																													2.9	3	0.375564	17
																																													2.9	3	0.36	18
																																													2.9	3	0.269048	19
																																													2.5	4	0.212891	12
																																													2.9	3	0.321714	20
																																													2.9	3	0.261268	21
																																													2.9	3	0.278972	22
																																													2.9	3	0.431752	23
																																													2.9	3	0.607321	24
																																													2.9	3	0.432692	25
																																													2.9	4	0.3325	1
																																													2.9	4	0.243452	2
																																													2.9	4	0.29958	3
																																													2.9	4	0.394595	4
																																													2.5	4	0.398947	13
																																													2.9	4	0.522195	5
																																													2.9	4	0.268321	6
																																													2.9	4	0.207836	7
																																													2.9	4	0.208163	8
																																													2.9	4	0.261677	9
																																													2.9	4	0.455254	10
																																													2.9	4	0.300664	11
																																													2.9	4	0.190811	12
																																													2.9	4	0.325424	13
																																													2.9	4	0.214145	14
																																													2.5	4	0.256024	14
																																													2.9	4	0.285204	15
																																													2.9	4	0.278571	16
																																													2.9	4	0.255	17
																																													2.9	4	0.354321	18
																																													2.9	4	0.234286	19
																																													2.9	4	0.29734	20
																																													2.9	4	0.234659	21
																																													2.9	4	0.274837	22
																																													2.9	4	0.375676	23
																																													2.9	4	0.565748	24
																																													2.5	3	0.553021	4
																																													2.5	4	0.336864	15
																																													2.9	4	0.311384	25
																																													2.9	5	0.279032	1
																																													2.9	5	0.201136	2
																																													2.9	5	0.251914	3
																																													2.9	5	0.268012	4
																																													2.9	5	0.486842	5
																																													2.9	5	0.2395	6
																																													2.9	5	0.205435	7
																																													2.9	5	0.177338	8
																																													2.9	5	0.223182	9
																																													2.5	4	0.314481	16
																																													2.9	5	0.449107	10
																																													2.9	5	0.282661	11
																																													2.9	5	0.168345	12
																																													2.9	5	0.256597	13
																																													2.9	5	0.178523	14
																																													2.9	5	0.2784	15
																																													2.9	5	0.274809	16
																																													2.9	5	0.244304	17
																																													2.9	5	0.311326	18
																																													2.9	5	0.224299	19
																																													2.5	4	0.303779	17
																																													2.9	5	0.25232	20
																																													2.9	5	0.215108	21
																																													2.9	5	0.242763	22
																																													2.9	5	0.35625	23
																																													2.9	5	0.380537	24
																																													2.9	5	0.278467	25
																																													2.9	6	0.255959	1
																																													2.9	6	0.198276	2
																																													2.9	6	0.22126	3
																																													2.9	6	0.243617	4
																																													2.5	4	0.416142	18
																																													2.9	6	0.46592	5
																																													2.9	6	0.2335	6
																																													2.9	6	0.202837	7
																																													2.9	6	0.173141	8
																																													2.9	6	0.202765	9
																																													2.9	6	0.335294	10
																																													2.9	6	0.25878	11
																																													2.9	6	0.164474	12
																																													2.9	6	0.251333	13
																																													2.9	6	0.168452	14
																																													2.5	4	0.296903	19
																																													2.9	6	0.272541	15
																																													2.9	6	0.245327	16
																																													2.9	6	0.213333	17
																																													2.9	6	0.232584	18
																																													2.9	6	0.207325	19
																																													2.9	6	0.224107	20
																																													2.9	6	0.18964	21
																																													2.9	6	0.178571	22
																																													2.9	6	0.338265	23
																																													2.9	6	0.374699	24
																																													2.5	4	0.343885	20
																																													2.9	6	0.26677	25
																																													2.9	7	0.219318	1
																																													2.9	7	0.192523	2
																																													2.9	7	0.215809	3
																																													2.9	7	0.236283	4
																																													2.9	7	0.353186	5
																																													2.9	7	0.231111	6
																																													2.9	7	0.177647	7
																																													2.9	7	0.159322	8
																																													2.9	7	0.160494	9
																																													2.5	4	0.290476	21
																																													2.9	7	0.250296	10
																																													2.9	7	0.251395	11
																																													2.9	7	0.152825	12
																																													2.9	7	0.253704	13
																																													2.9	7	0.164072	14
																																													2.9	7	0.256579	15
																																													2.9	7	0.231855	16
																																													2.9	7	0.191429	17
																																													2.9	7	0.229048	18
																																													2.9	7	0.168919	19
																																													2.5	4	0.333197	22
																																													2.9	7	0.216667	20
																																													2.9	7	0.171774	21
																																													2.9	7	0.166797	22
																																													2.9	7	0.27395	23
																																													2.9	7	0.355337	24
																																													2.9	7	0.261443	25
																																													2.9	8	0.209184	1
																																													2.9	8	0.181905	2
																																													2.9	8	0.204196	3
																																													2.9	8	0.220979	4
																																													2.5	4	0.456	23
																																													2.9	8	0.299405	5
																																													2.9	8	0.21746	6
																																													2.9	8	0.177083	7
																																													2.9	8	0.155385	8
																																													2.9	8	0.155026	9
																																													2.9	8	0.246354	10
																																													2.9	8	0.237952	11
																																													2.9	8	0.151437	12
																																													2.9	8	0.253274	13
																																													2.9	8	0.156686	14
																																													2.9	8	0.216058	15
																																													2.9	8	0.233628	16
																																													2.9	8	0.161972	17
																																													2.9	8	0.217623	18
																																													2.9	8	0.154196	19
																																													2.9	8	0.2125	20
																																													2.9	8	0.151777	21
																																													2.9	8	0.162587	22
																																													2.9	8	0.266818	23
																																													2.9	8	0.350701	24
																																													2.5	4	0.364979	25
																																													2.9	8	0.25	25
																																													2.9	9	0.183544	1
																																													2.9	9	0.16049	2
																																													2.9	9	0.203672	3
																																													2.9	9	0.17973	4
																																													2.9	9	0.266225	5
																																													2.9	9	0.188806	6
																																													2.9	9	0.168947	7
																																													2.9	9	0.147105	8
																																													2.9	9	0.151225	9
																																													2.5	5	0.372727	1
																																													2.9	9	0.218534	10
																																													2.9	9	0.186184	11
																																													2.9	9	0.151734	12
																																													2.9	9	0.224597	13
																																													2.9	9	0.153141	14
																																													2.9	9	0.183333	15
																																													2.9	9	0.21568	16
																																													2.9	9	0.147857	17
																																													2.9	9	0.203061	18
																																													2.9	9	0.144262	19
																																													2.5	5	0.254091	2
																																													2.9	9	0.210432	20
																																													2.9	9	0.145313	21
																																													2.9	9	0.161724	22
																																													2.9	9	0.262308	23
																																													2.9	9	0.317784	24
																																													2.9	9	0.230645	25
																																													3.1	3	0.370866	1
																																													3.1	3	0.258273	2
																																													3.1	3	0.293089	3
																																													3.1	3	0.456846	4
																																													2.5	5	0.283704	3
																																													3.1	3	0.510442	5
																																													3.1	3	0.271233	6
																																													3.1	3	0.274074	7
																																													3.1	3	0.238953	8
																																													3.1	3	0.258381	9
																																													3.1	3	0.484797	10
																																													3.1	3	0.299351	11
																																													3.1	3	0.19877	12
																																													3.1	3	0.389754	13
																																													3.1	3	0.25042	14
																																													2.5	5	0.313488	4
																																													3.1	3	0.278505	15
																																													3.1	3	0.31164	16
																																													3.1	3	0.342857	17
																																													3.1	3	0.335784	18
																																													3.1	3	0.25099	19
																																													3.1	3	0.298485	20
																																													3.1	3	0.236207	21
																																													3.1	3	0.262162	22
																																													3.1	3	0.40199	23
																																													3.1	3	0.550704	24
																																													2.5	5	0.564286	5
																																													3.1	3	0.394783	25
																																													3.1	4	0.307937	1
																																													3.1	4	0.215254	2
																																													3.1	4	0.277444	3
																																													3.1	4	0.369048	4
																																													3.1	4	0.49291	5
																																													3.1	4	0.255325	6
																																													3.1	4	0.202134	7
																																													3.1	4	0.196729	8
																																													3.1	4	0.242466	9
																																													2.5	5	0.28785	6
																																													3.1	4	0.422599	10
																																													3.1	4	0.2728	11
																																													3.1	4	0.180769	12
																																													3.1	4	0.302258	13
																																													3.1	4	0.202486	14
																																													3.1	4	0.26773	15
																																													3.1	4	0.265839	16
																																													3.1	4	0.236184	17
																																													3.1	4	0.326866	18
																																													3.1	4	0.216667	19
																																													2.5	5	0.2425	7
																																													3.1	4	0.26844	20
																																													3.1	4	0.212992	21
																																													3.1	4	0.257143	22
																																													3.1	4	0.350565	23
																																													3.1	4	0.51087	24
																																													3.1	4	0.289922	25
																																													3.1	5	0.255592	1
																																													3.1	5	0.19	2
																																													3.1	5	0.234921	3
																																													3.1	5	0.255114	4
																																													2.5	5	0.206944	8
																																													3.1	5	0.456375	5
																																													3.1	5	0.219792	6
																																													3.1	5	0.201744	7
																																													3.1	5	0.168085	8
																																													3.1	5	0.208824	9
																																													3.1	5	0.418579	10
																																													3.1	5	0.261607	11
																																													3.1	5	0.161561	12
																																													3.1	5	0.243939	13
																																													3.1	5	0.170629	14
																																													2.5	5	0.273485	9
																																													3.1	5	0.26162	15
[truncated: 1,377 more rows]
