# Supplementary material for: Putting the theory into ‘burstlet theory’ with a biophysical model of burstlets and bursts in the respiratory preBötzinger complex
Source: eLife. 2022 Apr 5;11:e75713. doi: 10.7554/eLife.75713 (PMC9023056; doi:10.7554/eLife.75713)
Supplement: Figure 8—source data 1. [file elife-75713-fig8-data1.xlsx]

## Sheet: Sheet1
	Panel A					Panel B					Panel C						Panel D: P_PP=1%			Panel E: P_PP=4%				Panel F					Panel G: P_PP=1%					Panel G: P_PP=2%					Panel G: P_PP=4%					Panel H
	Stimulation Time	# Stimulated	Delay	Seed		Stimulation Time	# Stimulated	Delay	Seed		Stimulation Time	# Stimulated	Delay	Seed			Time	Probability		Time	Probability			P_PP	Refractory Period (s)	Delay	STD Delay		Stim Time	# Stim	Delay	STD Delay		Stim Time	# Stim	Delay	STD Delay		Stim Time	# Stim	Delay	STD Delay		Stimulation Time	# of Followers Stimulated	Probability
	3.9	3	0.145833	1		1	8	0.7499	14		1.4	9	0.9	3			0.1	0.04		1.3	0			0.01	0.1	0.301691	0.172411		0.1	3	0.930247	0		0	3	NaN	NaN		1.3	3	NaN	NaN		1	1	0
	3.9	3	0.17913	10		1	9	0.606567	14		1.4	9	0.772093	22			0.2	0.04		1.4	0			0.02	1	0.313145	0.139659		0.2	3	0.812879	0		0.1	3	NaN	NaN		1.4	3	NaN	NaN		1	2	0
	0.1	6	0.883766	3		1.1	6	0.70046	14		1.4	9	0.414043	25			0.3	0.04		1.5	0			0.04	1.3	0.412551	0.195609		0.3	3	0.742105	0		0.2	3	NaN	NaN		1.5	3	NaN	NaN		1	3	0
	3.9	3	0.154545	11		1.1	7	0.687625	14		1.5	9	0.684774	3			0.4	0.16		1.6	0								0.4	3	0.77783	0.191525		0.3	3	NaN	NaN		1.6	3	NaN	NaN		1	4	0
	3.9	3	0.145933	12		1.1	7	0.603296	22		1.5	9	0.48894	22			0.5	0.2		1.7	0								0.5	3	0.721544	0.17672		0.4	3	NaN	NaN		1.7	3	NaN	NaN		1	5	0
	0.1	9	0.880645	3		1.1	8	0.445885	14		1.5	9	0.355871	25			0.6	0.28		1.8	0								0.6	3	0.704991	0.17789		0.5	3	NaN	NaN		1.8	3	NaN	NaN		1	6	0.0720721
	3.9	3	0.193069	13		1.1	8	0.814629	21		1.6	6	0.726862	22			0.7	0.4		1.9	0								0.7	3	0.712243	0.185475		0.6	3	NaN	NaN		1.9	3	NaN	NaN		1	7	0.0555556
	3.9	3	0.16627	14		1.1	8	0.71669	22		1.6	9	0.492574	3			0.8	0.56		2	0								0.8	3	0.696549	0.178414		0.7	3	NaN	NaN		2	3	NaN	NaN		1	8	0.178571
	0.1	9	0.9116	15		1.1	9	0.607253	8		1.6	9	0.841954	8			0.9	0.56		2.1	0								0.9	3	0.627261	0.146209		0.8	3	NaN	NaN		2.1	3	NaN	NaN		1	9	0.2
	3.9	3	0.151034	15		1.1	9	0.425669	14		1.6	9	0.653898	9			1	0.6		2.2	0								1	3	0.58242	0.145484		0.9	3	NaN	NaN		2.2	3	NaN	NaN		1.1	1	0
	0.1	9	0.998361	25		1.1	9	0.498858	19		1.6	9	0.714489	11			1.1	0.6		2.3	0.04								1.1	3	0.531745	0.121222		1	3	NaN	NaN		2.3	3	0.754953	0		1.1	2	0
	0.2	3	0.812879	3		1.1	9	0.75677	21		1.6	9	0.385714	22			1.2	0.6		2.4	0.16								1.2	3	0.486024	0.10765		1.1	3	NaN	NaN		2.4	3	0.756499	0.103377		1.1	3	0
	3.9	3	0.180078	16		1.1	9	0.514307	22		1.6	9	0.315897	25			1.3	0.6		2.5	0.24								1.3	3	0.448644	0.0983015		1.2	3	NaN	NaN		2.5	3	0.683295	0.116816		1.1	4	0
	3.9	3	0.157182	17		1.2	5	0.636081	14		1.7	6	0.600674	22			1.4	0.68		2.6	0.28								1.4	3	0.452403	0.132009		1.3	3	NaN	NaN		2.6	3	0.658141	0.147801		1.1	5	0
	0.2	6	0.830612	2		1.2	6	0.475889	14		1.7	9	0.409628	3			1.5	0.68		2.7	0.36								1.5	3	0.415312	0.101169		1.4	3	NaN	NaN		2.7	3	0.634402	0.155445		1.1	6	0.126126
	0.2	6	0.808148	3		1.2	6	0.540403	22		1.7	9	0.722251	8			1.6	0.72		2.8	0.36								1.6	3	0.39884	0.0996953		1.5	3	0.721858	0		2.8	3	0.57448	0.138377		1.1	7	0.25
	3.9	3	0.160884	18		1.2	7	0.53954	12		1.7	9	0.518167	9			1.7	0.8		2.9	0.44								1.7	3	0.417071	0.153257		1.6	3	0.721942	0.362929		2.9	3	0.579998	0.161123		1.1	8	0.488095
	3.9	3	0.141234	19		1.2	7	0.43612	14		1.7	9	0.531151	11			1.8	0.84		3	0.52								1.8	3	0.397078	0.130859		1.7	3	0.741037	0.204395		3	3	0.571722	0.158233		1.1	9	0.6
	3.9	3	0.15479	2		1.2	7	0.452292	22		1.7	9	0.769169	12			1.9	0.88		3.1	0.64								1.9	3	0.380495	0.116043		1.8	3	0.59369	0.125523		3.1	3	0.58842	0.17704		1.2	1	0
	3.9	3	0.168952	20		1.2	8	0.648492	8		1.7	9	0.798136	15			2	0.92		3.2	0.68								2	3	0.36193	0.101623		1.9	3	0.57477	0.116965		3.2	3	0.569785	0.177446		1.2	2	0
	0.2	6	0.655102	25		1.2	8	0.535069	12		1.7	9	0.7592	21			2.1	0.92		3.3	0.76								2.1	3	0.338076	0.0845936		2	3	0.505641	0.0995811		3.3	3	0.580462	0.200268		1.2	3	0
	0.2	9	0.959353	1		1.2	8	0.401941	14		1.7	9	0.317562	22			2.2	0.96		3.4	0.8								2.2	3	0.338273	0.10822		2.1	3	0.498576	0.10576		3.4	3	0.533119	0.169822		1.2	4	0
	0.2	9	0.819712	2		1.2	8	0.879299	19		1.7	9	0.294017	25			2.3	0.96		3.5	0.84								2.3	3	0.319629	0.0919582		2.2	3	0.469968	0.107033		3.5	3	0.5142	0.175161		1.2	5	0.176471
	0.2	9	0.805263	3		1.2	8	0.565022	21		1.8	6	0.457887	22			2.4	0.96		1.3	0								2.4	3	0.30377	0.0818148		2.3	3	0.469615	0.152844		1.3	6	NaN	NaN		1.2	6	0.414414
	0.2	9	0.908929	4		1.2	8	0.456036	22		1.8	6	0.800482	25			2.5	1		1.4	0								2.5	3	0.311884	0.122369		2.4	3	0.429344	0.104232		1.4	6	NaN	NaN		1.2	7	0.527778
	0.2	9	0.962662	8		1.2	9	0.952532	2		1.8	9	0.35636	3			2.6	1		1.5	0								2.6	3	0.296224	0.103511		2.5	3	0.405539	0.0962577		1.5	6	NaN	NaN		1.2	8	0.75
	3.9	3	0.166822	21		1.2	9	0.729953	7		1.8	9	0.601806	8			2.7	1		1.6	0.04								2.7	3	0.285475	0.0920666		2.6	3	0.415156	0.145896		1.6	6	0.726862	0		1.2	9	0.6
	0.2	9	0.747283	15		1.2	9	0.462932	8		1.8	9	0.454386	9			2.8	1		1.7	0.04								2.8	3	0.275117	0.0817215		2.7	3	0.397173	0.129655		1.7	6	0.600674	0		1.3	1	0
	3.9	3	0.146	22		1.2	9	0.743693	9		1.8	9	0.408108	11			2.9	1		1.8	0.08								2.9	3	0.265714	0.0733742		2.8	3	0.375891	0.118047		1.8	6	0.629184	0.242251		1.3	2	0
	0.2	9	0.552344	25		1.2	9	0.53615	11		1.8	9	0.651809	12			3	1		1.9	0.12								3	3	0.257592	0.0691603		2.9	3	0.356249	0.103234		1.9	6	0.596305	0.177252		1.3	3	0
	0.3	3	0.742105	3		1.2	9	0.444438	12		1.8	9	0.571515	15			3.1	1		2	0.16								3.1	3	0.248923	0.0636228		3	3	0.341567	0.0963719		2	6	0.529066	0.142628		1.3	4	0
	3.9	3	0.162595	23		1.2	9	0.382434	14		1.8	9	0.777621	17			3.2	1		2.1	0.28								3.2	3	0.242603	0.0600649		3.1	3	0.328774	0.0937033		2.1	6	0.526131	0.138608		1.3	5	0.382353
	3.9	3	0.207407	24		1.2	9	0.739946	17		1.8	9	0.560398	21			3.3	1		2.2	0.44								3.3	3	0.237369	0.0573574		3.2	3	0.317889	0.0916104		2.2	6	0.575217	0.213226		1.3	6	0.513514
	3.9	3	0.171678	25		1.2	9	0.376567	19		1.8	9	0.2775	22			3.4	1		2.3	0.44								3.4	3	0.232147	0.0562964		3.3	3	0.307969	0.088025		2.3	6	0.492547	0.152705		1.3	7	0.777778
	0.3	6	0.763245	1		1.2	9	0.478759	21		1.8	9	0.626471	23			3.5	0.96		2.4	0.52								3.5	3	0.224983	0.0545215		3.4	3	0.298787	0.0870366		2.4	6	0.492509	0.180667		1.3	8	0.892857
	0.3	6	0.688462	2		1.2	9	0.432936	22		1.8	9	0.269036	25			3.9	1		2.5	0.68								3.9	3	0.160464	0.0175066		3.5	3	0.289806	0.0839794		2.5	6	0.518605	0.208891		1.3	9	0.8
	0.3	6	0.692661	3		1.3	5	0.520558	14		1.9	6	0.756623	3			0.1	0.04		2.6	0.72								0.1	6	0.883766	0		0	4	NaN	NaN		2.6	6	0.488801	0.192822		1.4	1	0
	0.3	6	0.739806	4		1.3	6	0.483735	12		1.9	6	0.405956	22			0.2	0.12		2.7	0.8								0.2	6	0.764621	0.0955088		0.1	4	NaN	NaN		2.7	6	0.467709	0.174334		1.4	2	0
	0.3	6	0.980791	8		1.3	6	0.42451	14		1.9	6	0.626335	25			0.3	0.28		2.8	0.88								0.3	6	0.742103	0.134062		0.2	4	NaN	NaN		2.8	6	0.436931	0.148942		1.4	3	0
	3.9	6	0.114107	1		1.3	6	0.446855	22		1.9	9	0.966429	1			0.4	0.44		2.9	0.88								0.4	6	0.68046	0.169998		0.3	4	NaN	NaN		2.9	6	0.40164	0.123092		1.4	4	0.6
	3.9	6	0.115476	2		1.3	7	0.551299	8		1.9	9	0.321316	3			0.5	0.52		3	0.88								0.5	6	0.637264	0.159324		0.4	4	NaN	NaN		3	6	0.373841	0.11425		1.4	5	0.588235
	0.3	6	0.793644	23		1.3	7	0.806512	9		1.9	9	0.574113	4			0.6	0.68		3.1	0.92								0.6	6	0.628292	0.170439		0.5	4	NaN	NaN		3.1	6	0.376057	0.160746		1.4	6	0.711712
	0.3	6	0.536111	25		1.3	7	0.386066	12		1.9	9	0.518707	8			0.7	0.8		3.2	0.96								0.7	6	0.590393	0.166347		0.6	4	NaN	NaN		3.2	6	0.376709	0.186148		1.4	7	0.875
	0.3	9	0.745455	1		1.3	7	0.396124	14		1.9	9	0.388978	9			0.8	0.88		3.3	0.96								0.8	6	0.54449	0.153353		0.7	4	NaN	NaN		3.3	6	0.355794	0.180009		1.4	8	0.928571
	0.3	9	0.679333	2		1.3	7	0.411778	22		1.9	9	0.36194	11			0.9	0.88		3.4	0.96								0.9	6	0.485285	0.134131		0.8	4	NaN	NaN		3.4	6	0.33356	0.158955		1.4	9	1
	0.3	9	0.57783	3		1.3	8	0.681694	7		1.9	9	0.517614	12			1	0.88		3.5	0.96								1	6	0.437408	0.10742		0.9	4	NaN	NaN		3.5	6	0.319117	0.153598		1.5	1	0
	0.3	9	0.76381	4		1.3	8	0.518611	8		1.9	9	0.482051	15			1.1	0.88		1.3	0.04								1.1	6	0.396525	0.0883941		1	4	NaN	NaN		1.3	9	0.492069	0		1.5	2	0
	3.9	6	0.11301	3		1.3	8	0.558491	9		1.9	9	0.660848	17			1.2	0.92		1.4	0.12								1.2	6	0.372612	0.0840644		1.1	4	NaN	NaN		1.4	9	0.695379	0.251898		1.5	3	0
	0.3	9	0.779085	5		1.3	8	0.381343	12		1.9	9	0.696237	19			1.3	1		1.5	0.12								1.3	6	0.36627	0.103984		1.2	4	NaN	NaN		1.5	9	0.509862	0.165447		1.5	4	1
	0.3	9	0.905072	8		1.3	8	0.366434	14		1.9	9	0.452405	21			1.4	1		1.6	0.24								1.4	6	0.340378	0.0934954		1.3	4	NaN	NaN		1.6	9	0.567421	0.203155		1.5	5	0.764706
	0.3	9	0.73694	10		1.3	8	0.66943	16		1.9	9	0.255085	22			1.5	1		1.7	0.36								1.5	6	0.31862	0.0823262		1.4	4	NaN	NaN		1.7	9	0.568809	0.200151		1.5	6	0.927928
	0.3	9	0.627826	12		1.3	8	0.465625	19		1.9	9	0.501652	23			1.6	1		1.8	0.44								1.6	6	0.301333	0.0760034		1.5	4	0.696263	0.219038		1.8	9	0.505001	0.164004		1.5	7	0.916667
	3.9	6	0.119505	4		1.3	8	0.406915	21		1.9	9	0.251277	25			1.7	1		1.9	0.56								1.7	6	0.286092	0.0707024		1.6	4	0.572423	0.216058		1.9	9	0.496332	0.191282		1.5	8	0.964286
	0.3	9	0.643617	15		1.3	8	0.389222	22		1.3	9	0.492069	25			1.8	1		2	0.64								1.8	6	0.272323	0.0675894		1.7	4	0.580881	0.193296		2	9	0.479112	0.211629		1.5	9	1
	0.3	9	0.760938	23		1.3	9	0.537342	2		2.1	6	0.490407	3			1.9	1		2.1	0.8								1.9	6	0.260523	0.0633685		1.8	4	0.466934	0.110288		2.1	9	0.475054	0.198134
	3.9	3	0.133594	3		1.3	9	0.594956	4		2.1	6	0.729545	4			2	1		2.2	0.84								2	6	0.249872	0.0596671		1.9	4	0.518237	0.150313		2.2	9	0.437347	0.185986
	3.9	6	0.159259	5		1.3	9	0.573303	7		2.1	6	0.5818	9			2.1	1		2.3	0.88								2.1	6	0.24071	0.0575414		2	4	0.467211	0.113248		2.3	9	0.416814	0.192056
	0.3	9	0.449383	25		1.3	9	0.382595	8		2.1	6	0.652516	11			2.2	1		2.4	0.92								2.2	6	0.231715	0.0546703		2.1	4	0.452552	0.120424		2.4	9	0.384397	0.170027
	0.4	3	0.703443	1		1.3	9	0.51895	9		2.1	6	0.322477	22			2.3	1		2.5	0.92								2.3	6	0.223813	0.0516517		2.2	4	0.416894	0.10102		2.5	9	0.345502	0.127979
	0.4	3	0.5427	3		1.3	9	0.452765	11		2.1	6	0.479558	23			2.4	1		2.6	0.92								2.4	6	0.214948	0.0492935		2.3	4	0.396199	0.102026		2.6	9	0.315562	0.104099
	0.4	3	0.958342	8		1.3	9	0.361818	12		2.1	6	0.426613	25			2.5	1		2.7	0.92								2.5	6	0.20868	0.0480827		2.4	4	0.368024	0.0893239		2.7	9	0.291551	0.0856728
	3.9	6	0.125568	6		1.3	9	0.354315	14		2.1	9	0.641975	1			2.6	1		2.8	1								2.6	6	0.202468	0.0450242		2.5	4	0.367698	0.134398		2.8	9	0.320104	0.174104
	0.4	3	0.906834	19		1.3	9	0.625505	15		2.1	9	0.274352	3			2.7	1		2.9	1								2.7	6	0.196597	0.0420239		2.6	4	0.339036	0.0974653		2.9	9	0.29473	0.14276
	3.9	6	0.153488	7		1.3	9	0.527528	16		2.1	9	0.424208	4			2.8	1		3	1								2.8	6	0.191009	0.0403416		2.7	4	0.345607	0.143891		3	9	0.28001	0.13447
	0.4	6	0.536567	1		1.3	9	0.475163	17		2.1	9	0.999017	5			2.9	1		3.1	1								2.9	6	0.185409	0.0387831		2.8	4	0.321061	0.101511		3.1	9	0.260936	0.110705
	0.4	6	0.6094	2		1.3	9	0.780185	18		2.1	9	0.667985	6			3	1		3.2	1								3	6	0.182399	0.0373975		2.9	4	0.307666	0.0948482		3.2	9	0.249647	0.103204
	0.4	6	0.480792	3		1.3	9	0.323952	19		2.1	9	0.637079	7			3.1	1		3.3	1								3.1	6	0.17877	0.0357154		3	4	0.296264	0.0897735		3.3	9	0.2406	0.0972388
	0.4	6	0.611132	4		1.3	9	0.36443	21		2.1	9	0.388824	8			3.2	1		3.4	1								3.2	6	0.174936	0.0344227		3.1	4	0.285735	0.086884		3.4	9	0.229807	0.0891545
	3.9	6	0.123101	8		1.3	9	0.373315	22		2.1	9	0.314	9			3.3	1		3.5	1								3.3	6	0.171483	0.0334891		3.2	4	0.277285	0.0839165		3.5	9	0.220497	0.0777093
	0.4	6	0.876848	8		1.3	9	0.818997	25		2.1	9	0.307857	11			3.4	1											3.4	6	0.168567	0.0320305		3.3	4	0.270087	0.081259
	0.4	6	0.894038	11		1.4	5	0.45881	12		2.1	9	0.378404	12			3.5	1											3.5	6	0.16655	0.03203		3.4	4	0.262543	0.0799582
	0.4	6	0.564502	12		1.4	5	0.455357	14		2.1	9	0.358689	15			3.9	1											3.9	6	0.13061	0.0168098		3.5	4	0.255179	0.0778356
	0.4	6	0.847556	13		1.4	6	0.753333	7		2.1	9	0.703579	16			0.1	0.12											0.1	9	0.930202	0.0610226		0	5	NaN	NaN
	3.9	6	0.12341	9		1.4	6	0.761564	8		2.1	9	0.432008	17			0.2	0.28											0.2	9	0.822221	0.144216		0.1	5	NaN	NaN
	0.4	6	0.887863	19		1.4	6	0.376296	12		2.1	9	0.631209	18			0.3	0.44											0.3	9	0.697208	0.120826		0.2	5	NaN	NaN
	0.4	6	0.716567	23		1.4	6	0.379851	14		2.1	9	0.551454	19			0.4	0.64											0.4	9	0.663354	0.152805		0.3	5	NaN	NaN
	3.9	6	0.123488	10		1.4	6	0.39812	22		2.1	9	0.603924	20			0.5	0.76											0.5	9	0.606627	0.140838		0.4	5	NaN	NaN
	0.4	6	0.459796	25		1.4	7	0.69019	7		2.1	9	0.343624	21			0.6	0.92											0.6	9	0.543276	0.126032		0.5	5	NaN	NaN
	0.4	9	0.522716	1		1.4	7	0.450234	8		2.1	9	0.223684	22			0.7	0.92											0.7	9	0.457752	0.0968306		0.6	5	NaN	NaN
	0.4	9	0.599319	2		1.4	7	0.551351	9		2.1	9	0.401316	23			0.8	0.96											0.8	9	0.413845	0.0861452		0.7	5	NaN	NaN
	0.4	9	0.472817	3		1.4	7	0.338158	12		2.1	9	0.217901	25			0.9	0.96											0.9	9	0.374726	0.0717959		0.8	5	NaN	NaN
	0.4	9	0.608705	4		1.4	7	0.360403	14		2.2	6	0.431026	3			1	1											1	9	0.359937	0.122189		0.9	5	NaN	NaN
	0.4	9	0.699255	5		1.4	7	0.53169	19		2.2	6	0.685019	4			1.1	1											1.1	9	0.323458	0.0809032		1	5	NaN	NaN
	0.4	9	0.837098	8		1.4	7	0.57268	21		2.2	6	0.500639	9			1.2	1											1.2	9	0.300447	0.0751332		1.1	5	NaN	NaN
	3.9	6	0.127439	11		1.4	7	0.367929	22		2.2	6	0.473462	11			1.3	1											1.3	9	0.283721	0.0723113		1.2	5	0.636081	0
	0.4	9	0.65767	10		1.4	8	0.693243	4		2.2	6	0.982729	12			1.4	1											1.4	9	0.265579	0.0655098		1.3	5	0.520558	0
	0.4	9	0.842069	11		1.4	8	0.559833	7		2.2	6	0.884789	17			1.5	1											1.5	9	0.251761	0.061075		1.4	5	0.457083	0.0024412
	0.4	9	0.551003	12		1.4	8	0.42449	8		2.2	6	0.693849	20			1.6	1											1.6	9	0.239661	0.0573517		1.5	5	0.638151	0.225451
	0.4	9	0.565586	15		1.4	8	0.493466	9		2.2	6	0.550622	21			1.7	1											1.7	9	0.227997	0.0538269		1.6	5	0.525744	0.188137
	0.4	9	0.759123	19		1.4	8	0.666953	11		2.2	6	0.300817	22			1.8	1											1.8	9	0.218537	0.0510618		1.7	5	0.540513	0.202135
	3.9	6	0.123295	12		1.4	8	0.334348	12		2.2	6	0.433143	23			1.9	1											1.9	9	0.209138	0.0489169		1.8	5	0.483139	0.142752
	0.4	9	0.939294	20		1.4	8	0.337156	14		2.2	6	0.391288	25			2	1											2	9	0.198923	0.0448495		1.9	5	0.491455	0.173485
	0.4	9	0.619218	22		1.4	8	0.702568	15		2.2	9	0.537871	1			2.1	1											2.1	9	0.19163	0.041951		2	5	0.418639	0.11169
	0.4	9	0.680832	23		1.4	8	0.513119	16		2.2	9	0.254524	3			2.2	1											2.2	9	0.185601	0.0396645		2.1	5	0.383112	0.0934441
	0.4	9	0.865672	24		1.4	8	0.51133	17		2.2	9	0.373502	4			2.3	1											2.3	9	0.18001	0.0376583		2.2	5	0.367145	0.107003
	0.4	9	0.393282	25		1.4	8	0.374219	19		2.2	9	0.802408	5			2.4	1											2.4	9	0.17525	0.0348663		2.3	5	0.360647	0.1131
	3.9	6	0.154167	13		1.4	8	0.343939	21		2.2	9	0.55011	6			2.5	1											2.5	9	0.169967	0.0331938		2.4	5	0.339176	0.101624
	3.9	6	0.128632	14		1.4	8	0.346131	22		2.2	9	0.507468	7			2.6	1											2.6	9	0.165602	0.0309701		2.5	5	0.320476	0.0932688
	3.9	3	0.169935	4		1.4	8	0.900152	25		2.2	9	0.356902	8			2.7	1											2.7	9	0.161877	0.0289537		2.6	5	0.304449	0.087019
	3.9	6	0.146691	15		1.4	9	0.778467	1		2.2	9	0.29	9			2.8	1											2.8	9	0.158833	0.0283853		2.7	5	0.291548	0.0828936
	3.9	6	0.151543	16		1.4	9	0.460094	2		2.2	9	0.932906	10			2.9	1											2.9	9	0.155894	0.0278453		2.8	5	0.279966	0.0806306
	3.9	6	0.127044	17		1.4	9	0.554149	3		2.2	9	0.290152	11			3	1											3	9	0.152833	0.026359		2.9	5	0.269048	0.0783948
	3.9	6	0.139925	18		1.4	9	0.490404	4		2.2	9	0.354829	12			3.1	1											3.1	9	0.150123	0.025669		3	5	0.260421	0.0756374
	3.9	6	0.114326	19		1.4	9	0.462955	7		2.2	9	0.329231	15			3.2	1											3.2	9	0.147677	0.0251528		3.1	5	0.251447	0.0723707
	3.9	6	0.129615	20		1.4	9	0.321557	8		2.2	9	0.577376	16			3.3	1											3.3	9	0.145513	0.0253442		3.2	5	0.243984	0.0706257
	3.9	6	0.130469	21		1.4	9	0.41299	9		2.2	9	0.388674	17			3.4	1											3.4	9	0.143232	0.0251495		3.3	5	0.238002	0.068672
	3.9	6	0.110078	22		1.4	9	0.62525	10		2.2	9	0.59206	18			3.5	1											3.5	9	0.140638	0.0242087		3.4	5	0.231868	0.0671865
	3.9	6	0.131973	23		1.4	9	0.409259	11		2.2	9	0.405	19			3.9	1											3.9	9	0.111469	0.012959		3.5	5	0.226239	0.0652462
	3.9	6	0.171759	24		1.4	9	0.325248	12		2.2	9	0.534733	20																				0	6	NaN	NaN
	3.9	3	0.161747	5		1.4	9	0.310513	14		2.2	9	0.315094	21																				0.1	6	NaN	NaN
	3.9	6	0.10787	25		1.4	9	0.485088	15		2.2	9	0.209091	22																				0.2	6	NaN	NaN
	3.9	9	0.102151	1		1.4	9	0.453676	16		2.2	9	0.372316	23																				0.3	6	NaN	NaN
	3.9	9	0.101842	2		1.4	9	0.397761	17		2.2	9	0.210047	25																				0.4	6	NaN	NaN
	3.9	9	0.10597	3		1.4	9	0.722442	18		2.3	3	0.754953	9																				0.5	6	NaN	NaN
	3.9	9	0.108239	4		1.4	9	0.293284	19		2.3	6	0.401538	3																				0.6	6	NaN	NaN
	3.9	9	0.121324	5		1.4	9	0.317133	21		2.3	6	0.637938	4																				0.7	6	NaN	NaN
	3.9	9	0.107754	6		1.4	9	0.32549	22		2.3	6	0.443575	9																				0.8	6	NaN	NaN
	3.9	9	0.139474	7		1.4	9	0.654661	25		2.3	6	0.4228	11																				0.9	6	NaN	NaN
	3.9	9	0.104188	8		1.5	7	0.666889	2		2.3	6	0.795857	12																				1	6	NaN	NaN
	3.9	9	0.102151	9		1.5	7	0.564085	3		2.3	6	0.62663	17																				1.1	6	0.70046	0
	3.9	3	0.144947	6		1.5	7	0.565	4		2.3	6	0.599775	20																				1.2	6	0.508146	0.0456184
	3.9	9	0.106972	10		1.5	7	0.527612	7		2.3	6	0.454762	21																				1.3	6	0.4517	0.0299083
	3.9	9	0.0997854	11		1.5	7	0.384507	8		2.3	6	0.274551	22																				1.4	6	0.533833	0.204321
	3.9	9	0.109821	12		1.5	7	0.505858	9		2.3	6	0.401262	23																				1.5	6	0.537519	0.198888
	3.9	9	0.137745	13		1.5	7	0.307602	12		2.3	6	0.35933	25																				1.6	6	0.476796	0.14495
	3.9	9	0.104132	14		1.5	7	0.318662	14		2.3	9	0.460366	1																				1.7	6	0.509996	0.168158
	3.9	9	0.112324	15		1.5	7	0.522941	16		2.3	9	0.246535	3																				1.8	6	0.441121	0.132488
	3.9	9	0.118056	16		1.5	7	0.416222	19		2.3	9	0.331818	4																				1.9	6	0.414133	0.126847
	3.9	9	0.101515	17		1.5	3	0.721858	12		2	6	0.562199	3																				2	6	0.374564	0.0998595
	3.9	9	0.115937	18		1.5	7	0.409669	21		2.3	9	0.699187	5																				2.1	6	0.355124	0.100563
	3.9	9	0.0978916	19		1.5	7	0.330601	22		2.3	9	0.440722	6																				2.2	6	0.329012	0.0858836
	3.9	3	0.166549	7		1.5	8	0.895208	1		2.3	9	0.469128	7																				2.3	6	0.32042	0.094161
	3.9	9	0.120902	20		1.5	8	0.648905	2		2.3	9	0.318722	8																				2.4	6	0.30297	0.086156
	3.9	9	0.116312	21		1.5	8	0.480851	3		2.3	9	0.267424	9																				2.5	6	0.287269	0.0820486
	3.9	9	0.0983539	22		1.5	8	0.48892	4		2.3	9	0.841543	10																				2.6	6	0.274294	0.0781435
	3.9	9	0.115407	23		1.5	8	0.433537	7		2.3	9	0.269762	11																				2.7	6	0.264319	0.0759005
	3.9	9	0.142727	24		1.5	8	0.359483	8		2.3	9	0.328797	12																				2.8	6	0.254263	0.074004
	3.9	9	0.0957529	25		1.5	8	0.381503	9		2.3	9	0.931986	14																				2.9	6	0.244751	0.0702676
	0.1	3	0.930247	3		1.5	8	0.617299	10		2.3	9	0.308143	15																				3	6	0.2373	0.0681031
	3.9	3	0.144904	8		1.5	8	0.536829	11		2.3	9	0.515142	16																				3.1	6	0.229086	0.065404
	3.9	3	0.136494	9		1.5	8	0.305975	12		2.3	9	0.362167	17																				3.2	6	0.223335	0.0634109
	0.5	3	0.630512	1		1.5	8	0.300913	14		2.3	9	0.491316	18																				3.3	6	0.217791	0.062226
	0.6	6	0.426315	1		1.5	8	0.542647	15		2.3	9	0.361867	19																				3.4	6	0.212124	0.0611671
	0.6	6	0.505194	2		1.5	8	0.458411	16		2.3	9	0.471612	20																				3.5	6	0.207688	0.0606334
	0.6	6	0.386334	3		1.5	8	0.42037	17		2.3	9	0.293304	21																				0	7	NaN	NaN
	0.6	6	0.445138	4		1.5	8	0.327128	19		2.3	9	0.205075	22																				0.1	7	NaN	NaN
	0.6	6	0.895923	6		1.5	8	0.303333	21		2.3	9	0.353381	23																				0.2	7	NaN	NaN
	0.6	6	0.706927	8		1.5	8	0.312019	22		2.3	9	0.201915	25																				0.3	7	NaN	NaN
	0.6	6	0.923676	10		1.5	8	0.724053	25		2.4	3	0.820021	3																				0.4	7	NaN	NaN
	0.6	6	0.717729	11		1.5	9	0.632444	1		2.4	3	0.676534	4																				0.5	7	NaN	NaN
	0.6	6	0.473338	12		1.5	9	0.408901	2		2.4	3	0.661049	9																				0.6	7	NaN	NaN
	0.6	6	0.705456	13		1.5	9	0.460217	3		2.4	3	0.868392	22																				0.7	7	NaN	NaN
	0.6	6	0.656696	15		1.5	9	0.402412	4		2.4	6	0.802995	1																				0.8	7	NaN	NaN
	0.6	6	0.716054	19		1.5	9	0.911934	5		2.4	6	0.361304	3																				0.9	7	NaN	NaN
	0.6	6	0.800594	20		1.5	9	0.388768	7		2.4	6	0.544211	4																				1	7	NaN	NaN
	0.6	6	0.701916	21		1.5	9	0.285032	8		2.4	6	0.40221	9																				1.1	7	0.64546	0.0596291
	0.6	6	0.623318	22		1.5	9	0.346959	9		2.4	6	0.387151	11																				1.2	7	0.475984	0.0556314
	0.6	6	0.632757	23		1.5	9	0.480286	10		2.4	6	0.590909	12																				1.3	7	0.510356	0.178605
	0.6	6	0.36359	25		1.5	9	0.376282	11		2	6	0.700114	9																				1.4	7	0.482829	0.124405
	0.6	9	0.395579	1		1.5	9	0.292308	12		2.4	6	0.558947	17																				1.5	7	0.459971	0.114967
	0.6	9	0.493746	2		1.5	9	0.641124	13		2.4	6	0.864021	19																				1.6	7	0.451939	0.139849
	0.6	9	0.375085	3		1.5	9	0.281818	14		2.4	6	0.524232	20																				1.7	7	0.45544	0.160206
	0.6	9	0.430065	4		1.5	9	0.408857	15		2.4	6	0.405401	21																				1.8	7	0.39644	0.109439
	0.6	9	0.568979	5		1.5	9	0.419444	16		2.4	6	0.257834	22																				1.9	7	0.38178	0.121927
	0.6	9	0.763766	6		1.5	9	0.3425	17		2.4	6	0.370442	23																				2	7	0.350681	0.102455
	0.6	9	0.460885	8		1.5	9	0.678036	18		2.4	6	0.332955	25																				2.1	7	0.322465	0.0858045
	0.6	9	0.527032	9		1.5	9	0.265819	19		2.4	9	0.403091	1																				2.2	7	0.302621	0.0753379
	0.6	9	0.513233	10		1.5	9	0.278696	21		2.4	9	0.229457	3																				2.3	7	0.285342	0.0689869
	0.6	9	0.578055	11		1.5	9	0.298966	22		2.4	9	0.308429	4																				2.4	7	0.272583	0.0656274
	0.6	9	0.468016	12		1.5	9	0.518884	25		2.4	9	0.662257	5																				2.5	7	0.259047	0.063691
	0.6	9	0.638218	13		1.6	3	0.465313	12		2.4	9	0.388701	6																				2.6	7	0.248011	0.0605968
	0.6	9	0.693396	14		1.6	3	0.978571	21		2.4	9	0.425096	7																				2.7	7	0.239165	0.0589681
	0.6	9	0.433621	15		1.6	4	0.56123	7		2.4	9	0.300915	8																				2.8	7	0.22967	0.0559615
	0.6	9	0.763145	17		1.6	4	0.450976	8		2.4	9	0.253309	9																				2.9	7	0.221671	0.0546292
	0.6	9	0.732143	18		1.6	4	0.397525	12		2.4	9	0.558685	10																				3	7	0.215496	0.0526696
	0.6	9	0.469515	19		1.6	4	0.879961	21		2.4	9	0.257865	11																				3.1	7	0.209282	0.0511949
	0.6	9	0.590884	20		1.6	5	0.63895	2		2.4	9	0.306818	12																				3.2	7	0.204468	0.049884
	0.6	9	0.608923	21		1.6	5	0.557312	3		2.4	9	0.905742	13																				3.3	7	0.199581	0.048167
	0.6	9	0.46972	22		1.6	5	0.549645	7		2.4	9	0.640079	14																				3.4	7	0.194332	0.0469384
	0.6	9	0.559275	23		1.6	5	0.393798	8		2.4	9	0.295455	15																				3.5	7	0.189382	0.0461935
	0.6	9	0.664003	24		1.6	5	0.310185	12		2.4	9	0.449286	16																				0	8	NaN	NaN
	0.6	9	0.298071	25		1.6	5	0.372131	14		2.4	9	0.325245	17																				0.1	8	NaN	NaN
	0.7	3	0.486264	1		1.6	5	0.858185	21		2.4	9	0.414154	18																				0.2	8	NaN	NaN
	0.7	3	0.384407	3		1.6	6	0.619474	2		2.4	9	0.324505	19																				0.3	8	NaN	NaN
	0.7	3	0.648751	4		1.6	6	0.505172	3		2.4	9	0.417187	20																				0.4	8	NaN	NaN
	0.7	3	0.785245	8		1.6	6	0.657295	4		2.4	9	0.270278	21																				0.5	8	NaN	NaN
	0.7	3	0.983233	10		1.6	6	0.515023	7		2.4	9	0.192056	22																				0.6	8	NaN	NaN
	0.7	3	0.737109	11		1.6	6	0.367956	8		2.4	9	0.324233	23																				0.7	8	NaN	NaN
	0.7	3	0.897059	12		1.6	6	0.528959	11		2.4	9	0.188288	25																				0.8	8	NaN	NaN
	0.7	3	0.604946	15		1.6	6	0.30431	12		2.5	3	0.706	3																				0.9	8	NaN	NaN
	0.7	3	0.736997	19		1.6	6	0.745122	13		2.5	3	0.623759	4																				1	8	0.7499	0
	0.7	3	0.858419	22		1.6	6	0.305867	14		2.5	3	0.531556	9																				1.1	8	0.659068	0.191005
	0.7	6	0.365364	1		1.6	6	0.4475	16		2.5	3	0.8615	17																				1.2	8	0.580977	0.169458
	0.7	6	0.460141	2		1.6	6	0.403439	21		2.5	3	0.620161	22																				1.3	8	0.493085	0.122011
	0.7	6	0.356922	3		1.6	6	0.321429	22		2.5	3	0.756791	23																				1.4	8	0.514353	0.17341
	0.7	6	0.3999	4		1.6	7	0.591401	2		2.5	6	0.576639	1																				1.5	8	0.474299	0.164773
	0.7	6	0.895923	5		1.6	7	0.449667	3		2.5	6	0.331788	3																				1.6	8	0.462389	0.167987
	0.7	6	0.695614	6		1.6	7	0.478856	4		2.5	6	0.451012	4																				1.7	8	0.417498	0.142526
	0.7	6	0.56745	8		1.6	7	0.439869	7		2.5	6	0.798339	6																				1.8	8	0.378004	0.113421
	0.7	6	0.698176	9		1.6	7	0.317172	8		2.5	6	0.922314	7																				1.9	8	0.342741	0.0972468
	0.7	6	0.630503	10		1.6	7	0.378947	9		2.5	6	0.553467	8																				2	8	0.317537	0.0871021
	0.7	6	0.667977	11		1.6	7	0.545455	10		2.5	6	0.373822	9																				2.1	8	0.296127	0.0747147
	0.7	6	0.440608	12		1.6	7	0.513086	11		2.5	6	0.861747	10																				2.2	8	0.2806	0.0694351
	0.7	6	0.651805	13		1.6	7	0.275446	12		2.5	6	0.361047	11																				2.3	8	0.265997	0.0653498
	0.5	3	0.837779	19		1.6	7	0.711864	13		2.5	6	0.495226	12																				2.4	8	0.253891	0.0623786
	0.7	6	0.601941	15		1.6	7	0.294444	14		2.5	6	0.511345	17																				2.5	8	0.241908	0.0586115
	0.7	6	0.961872	18		1.6	7	0.427838	16		2.5	6	0.80988	19																				2.6	8	0.233156	0.0557604
	0.7	6	0.639252	19		1.6	7	0.492969	17		2.5	6	0.477664	20																				2.7	8	0.22346	0.0538944
	0.7	6	0.668527	20		1.6	7	0.358571	19		2.5	6	0.376836	21																				2.8	8	0.216093	0.0522988
	0.7	6	0.634432	21		1.6	7	0.35175	21		2.5	6	0.251346	22																				2.9	8	0.209767	0.0511008
	0.7	6	0.547556	22		1.6	7	0.303571	22		2.5	6	0.354212	23																				3	8	0.203921	0.0481752
	0.7	6	0.591493	23		1.6	7	0.752063	25		2.5	6	0.309596	25																				3.1	8	0.198808	0.04701
	0.7	6	0.3324	25		1.6	8	0.664387	1		2.5	9	0.360623	1																				3.2	8	0.193837	0.0452916
	0.7	9	0.333991	1		1.6	8	0.540753	2		2.5	9	0.217881	3																				3.3	8	0.189333	0.0437769
	0.7	9	0.4299	2		1.6	8	0.430655	3		2.5	9	0.290604	4																				3.4	8	0.184457	0.0420008
	0.7	9	0.344431	3		1.6	8	0.446296	4		2.5	9	0.595411	5																				3.5	8	0.180859	0.0415874
	0.7	9	0.371329	4		1.6	8	0.601271	6		2.5	9	0.356135	6																				0	9	NaN	NaN
	0.7	9	0.456983	5		1.6	8	0.366477	7		2.5	9	0.396333	7																				0.1	9	NaN	NaN
	0.7	9	0.613362	6		1.6	8	0.302902	8		2.5	9	0.278618	8																				0.2	9	NaN	NaN
	0.7	9	0.382374	8		1.6	8	0.32987	9		2.5	9	0.23806	9																				0.3	9	NaN	NaN
	0.7	9	0.413579	9		1.6	8	0.478	10		2.5	9	0.509091	10																				0.4	9	NaN	NaN
	0.7	9	0.411233	10		1.6	8	0.490909	11		2.5	9	0.242727	11																				0.5	9	NaN	NaN
	0.7	9	0.435684	11		1.6	8	0.27439	12		2.5	9	0.293868	12																				0.6	9	NaN	NaN
	0.7	9	0.434646	12		1.6	8	0.67602	13		2.5	9	0.659912	13																				0.7	9	NaN	NaN
	0.7	9	0.586816	13		1.6	8	0.266558	14		2.5	9	0.554654	14																				0.8	9	NaN	NaN
	0.7	9	0.5874	14		1.6	8	0.457031	15		2.5	9	0.271779	15																				0.9	9	NaN	NaN
	0.7	9	0.39687	15		1.6	8	0.411086	16		2.5	9	0.409818	16																				1	9	0.606567	0
	0.7	9	0.513256	17		1.6	8	0.375874	17		2.5	9	0.299565	17																				1.1	9	0.560572	0.1273
	0.7	9	0.6099	18		1.6	8	0.750962	18		2.5	9	0.372406	18																				1.2	9	0.57094	0.189484
	0.7	9	0.398233	19		1.6	8	0.304792	19		2.5	9	0.306308	19																				1.3	9	0.50407	0.149448
	0.7	9	0.51713	20		1.5	4	0.752182	7		2.5	9	0.362658	20																				1.4	9	0.46318	0.145373
	0.7	9	0.522797	21		1.6	8	0.275455	21		2.5	9	0.254527	21																				1.5	9	0.434271	0.16434
	0.7	9	0.435138	22		1.6	8	0.289935	22		2.5	9	0.18087	22																				1.6	9	0.40673	0.145897
	0.7	9	0.464452	23		1.6	8	0.856232	23		2.5	9	0.31122	23																				1.7	9	0.371381	0.130321
	0.7	9	0.605408	24		1.6	8	0.5827	25		2.5	9	0.183475	25																				1.8	9	0.332211	0.10023
	0.7	9	0.263383	25		1.6	9	0.553226	1		2.6	3	0.569677	3																				1.9	9	0.304945	0.0853552
	0.8	3	0.431273	1		1.6	9	0.37027	2		2.6	3	0.622347	4																				2	9	0.284326	0.0731555
	0.8	3	0.3559	3		1.6	9	0.419512	3		2.6	3	0.483333	9																				2.1	9	0.268076	0.0673973
	0.8	3	0.616567	4		1.6	9	0.360677	4		2.6	3	0.941268	11																				2.2	9	0.253854	0.0630192
	0.8	3	0.964526	5		1.5	4	0.54462	8		2.6	3	0.70993	17																				2.3	9	0.240681	0.0598121
	0.8	3	0.783696	6		1.6	9	0.610227	5		2	6	0.356875	22																				2.4	9	0.230177	0.0556795
	0.8	3	0.626787	8		1.6	9	0.496753	6		2.6	3	0.577288	22																				2.5	9	0.220843	0.0535012
	0.8	3	0.652982	9		1.6	9	0.350223	7		2.6	3	0.703143	23																				2.6	9	0.21193	0.0508552
	0.8	3	0.901913	10		1.6	9	0.262963	8		2.6	6	0.530303	1																				2.7	9	0.204964	0.0485027
	0.8	3	0.671211	11		1.6	9	0.308213	9		2.6	6	0.311416	3																				2.8	9	0.198288	0.0453061
	0.8	3	0.828816	12		1.6	9	0.40979	10		2.6	6	0.396207	4																				2.9	9	0.192253	0.0441071
	0.8	3	0.563536	15		1.6	9	0.351293	11		2.6	6	0.68003	6																				3	9	0.18683	0.0423402
	0.8	3	0.917418	18		1.6	9	0.263866	12		2.6	6	0.750642	7																				3.1	9	0.182693	0.0413613
	0.8	3	0.659055	19		1.6	9	0.54183	13		2.6	6	0.469818	8																				3.2	9	0.178457	0.0401412
	0.8	3	0.778002	22		1.6	9	0.255699	14		2.6	6	0.357386	9																				3.3	9	0.173883	0.0380921
	0.8	6	0.326006	1		1.6	9	0.358092	15		2.6	6	0.819954	10																				3.4	9	0.169872	0.0374743
	0.8	6	0.424368	2		1.6	9	0.392593	16		2.6	6	0.333333	11																				3.5	9	0.166669	0.0367615
	0.8	6	0.327717	3		1.6	9	0.307	17		2.6	6	0.455525	12
	0.8	6	0.359838	4		1.6	9	0.567051	18		2.6	6	0.856111	16
	0.8	6	0.813536	5		1.6	9	0.24918	19		2.6	6	0.45766	17
	0.8	6	0.565872	6		1.6	9	0.482075	20		2.6	6	0.71056	19
	0.8	6	0.483368	8		1.6	9	0.257012	21		2.6	6	0.457692	20
	0.8	6	0.608909	9		1.6	9	0.277296	22		2.6	6	0.355036	21
	0.5	6	0.476567	1		1.6	9	0.861275	23		2.6	6	0.232569	22
	0.8	6	0.570317	10		1.6	9	0.4554	25		2.6	6	0.329	23
	0.8	6	0.609743	11		1.7	3	0.939447	2		2	6	0.497078	25
	0.8	6	0.415507	12		1.7	3	0.802642	7		2.6	6	0.295175	25
	0.8	6	0.617276	13		1.7	3	0.741576	8		2.6	9	0.331122	1
	0.8	6	0.680727	14		1.7	3	0.398624	12		2.6	9	0.209189	3
	0.8	6	0.562085	15		1.5	4	0.506186	12		2.6	9	0.271011	4
	0.8	6	0.780816	17		1.7	3	0.822897	21		2.6	9	0.552785	5
	0.8	6	0.869412	18		1.7	4	0.937678	2		2.6	9	0.327961	6
	0.8	6	0.551144	19		1.7	4	0.484663	7		2.6	9	0.368699	7
	0.5	6	0.55109	2		1.7	4	0.408287	8		2.6	9	0.260455	8
	0.8	6	0.525809	20		1.7	4	0.604869	11		2.6	9	0.221658	9
	0.8	6	0.568914	21		1.7	4	0.355455	12		2	9	0.776747	1
	0.8	6	0.508411	22		1.7	4	0.638291	14		2.6	9	0.458184	10
	0.8	6	0.507567	23		1.7	4	0.636923	21		2.6	9	0.228017	11
	0.8	6	0.301438	25		1.7	5	0.539412	2		2.6	9	0.273548	12
	0.8	9	0.297314	1		1.7	5	0.443714	3		2.6	9	0.512997	13
	0.8	9	0.396993	2		1.7	5	0.443617	7		2.6	9	0.484653	14
	0.8	9	0.320815	3		1.7	5	0.357991	8		2.6	9	0.261715	15
	0.8	9	0.340355	4		1.7	5	0.580147	11		2.6	9	0.374688	16
	0.5	6	0.427144	3		1.7	5	0.286598	12		2.6	9	0.272866	17
	0.8	9	0.417977	5		1.7	5	0.327891	14		2.6	9	0.340426	18
	0.8	9	0.554505	6		1.7	5	0.839401	16		2.6	9	0.2875	19
	0.8	9	0.351513	8		1.7	5	0.501702	21		2.6	9	0.335616	20
	0.8	9	0.355647	9		1.7	5	0.756156	22		2.6	9	0.240306	21
	0.8	9	0.368712	10		1.7	5	0.869018	25		2.6	9	0.173077	22
	0.8	9	0.387636	11		1.7	6	0.507609	2		2.6	9	0.297685	23
	0.8	9	0.404117	12		1.7	6	0.430729	3		2.6	9	0.173776	25
	0.8	9	0.534067	13		1.7	6	0.478426	4		2.7	3	0.517347	3
	0.8	9	0.454164	14		1.7	6	0.427353	7		2.7	3	0.602434	4
	0.5	6	0.509067	4		1.7	6	0.322443	8		2	9	0.300676	3
	0.8	9	0.372627	15		1.7	6	0.774346	9		2.7	3	0.43655	9
	0.8	9	0.575548	16		1.7	6	0.482895	11		2.7	3	0.682325	11
	0.8	9	0.444962	17		1.7	6	0.280612	12		2	9	0.479148	4
	0.8	9	0.548825	18		1.7	6	0.599583	13		2.7	3	0.668611	17
	0.8	9	0.333971	19		1.7	6	0.279615	14		2.7	3	0.970766	19
	0.8	9	0.470932	20		1.7	6	0.8375	15		2.7	3	0.719482	20
	0.8	9	0.478779	21		1.7	6	0.410094	16		2.7	3	0.515361	22
	0.8	9	0.370535	22		1.7	6	0.694025	17		2.7	3	0.596739	23
	0.8	9	0.430456	23		1.7	6	0.621535	18		2.7	6	0.454826	1
	0.8	9	0.479543	24		1.7	6	0.586967	19		2.7	6	0.302976	3
	0.5	3	0.462558	3		1.7	6	0.605556	20		2.7	6	0.363556	4
	0.8	9	0.242281	25		1.7	6	0.365833	21		2.7	6	0.566444	6
	0.9	3	0.402037	1		1.7	6	0.298288	22		2.7	6	0.629467	7
	0.9	3	0.337494	3		1.7	6	0.686511	25		2.7	6	0.435714	8
	0.9	3	0.585085	4		1.7	7	0.820648	1		2.7	6	0.346186	9
	0.9	3	0.770183	5		1.7	7	0.479948	2		2.7	6	0.708045	10
	0.9	3	0.68935	6		1.7	7	0.412288	3		2.7	6	0.316667	11
	0.9	3	0.575238	8		1.7	7	0.433918	4		2.7	6	0.410896	12
	0.9	3	0.545456	9		1.7	7	0.371088	7		2.7	6	0.811216	13
	0.9	3	0.833672	10		1.7	7	0.281208	8		2.7	6	0.702367	16
	0.9	3	0.627552	11		1.7	7	0.328012	9		2.7	6	0.429104	17
	0.9	3	0.737302	12		1.5	4	0.982063	21		2.7	6	0.693083	18
	0.9	3	0.531676	15		1.7	7	0.461084	10		2.7	6	0.645133	19
	0.9	3	0.808893	18		1.7	7	0.465417	11		2	9	0.789548	7
	0.9	3	0.607823	19		1.7	7	0.255068	12		2.7	6	0.399621	20
	0.9	3	0.7299	22		1.7	7	0.582544	13		2.7	6	0.337097	21
	0.9	6	0.295533	1		1.7	7	0.27027	14		2.7	6	0.215411	22
	0.9	6	0.37773	2		1.7	7	0.567442	15		2.7	6	0.311919	23
	0.9	6	0.308708	3		1.7	7	0.400641	16		2.7	6	0.274444	25
	0.9	6	0.327486	4		1.7	7	0.428767	17		2.7	9	0.312232	1
	0.5	6	0.820763	8		1.7	7	0.589855	18		2.7	9	0.201699	3
	0.9	6	0.735614	5		1.7	7	0.318182	19		2.7	9	0.259193	4
	0.9	6	0.522441	6		1.7	7	0.574	20		2	9	0.428838	8
	0.9	6	0.424275	8		1.7	7	0.318129	21		2.7	9	0.480786	5
	0.9	6	0.515466	9		1.7	7	0.277143	22		2.7	9	0.304781	6
	0.9	6	0.483033	10		1.7	7	0.811275	23		2.7	9	0.350813	7
	0.9	6	0.537995	11		1.7	7	0.572764	25		2.7	9	0.250667	8
	0.9	6	0.388102	12		1.7	8	0.606311	1		2.7	9	0.212683	9
	0.9	6	0.583536	13		1.7	8	0.429121	2		2.7	9	0.413029	10
	0.9	6	0.599487	14		1.7	8	0.399379	3		2.7	9	0.219231	11
	0.9	6	0.528126	15		1.7	8	0.398611	4		2.7	9	0.259722	12
	0.9	6	0.658176	17		1.7	8	0.696923	5		2.7	9	0.439617	13
	0.9	6	0.782208	18		1.7	8	0.47554	6		2.7	9	0.435789	14
	0.9	6	0.431833	19		1.7	8	0.332746	7		2	9	0.356149	9
	0.9	6	0.463668	20		1.7	8	0.271164	8		2.7	9	0.25303	15
	0.9	6	0.525324	21		1.7	8	0.294783	9		2.7	9	0.325472	16
	0.9	6	0.441301	22		1.7	8	0.41875	10		2.7	9	0.257895	17
	0.9	6	0.469653	23		1.7	8	0.452167	11		2.7	9	0.313203	18
	0.9	6	0.276567	25		1.7	8	0.253169	12		2.7	9	0.270213	19
	0.9	9	0.269998	1		1.7	8	0.565826	13		2.7	9	0.313208	20
	0.9	9	0.37255	2		1.7	8	0.252174	14		2.7	9	0.22	21
	0.9	9	0.302451	3		1.7	8	0.410644	15		2.7	9	0.167702	22
	0.9	9	0.317208	4		1.7	8	0.387013	16		2.7	9	0.275347	23
	0.9	9	0.387817	5		1.7	8	0.330714	17		2.7	9	0.169364	25
	0.9	9	0.470733	6		1.7	8	0.506964	18		2.8	3	0.484865	3
	0.9	9	0.325987	8		1.7	8	0.27381	19		2.8	3	0.559148	4
	0.9	9	0.330488	9		1.7	8	0.471802	20		2.8	3	0.405795	9
	0.5	6	0.826396	11		1.7	8	0.258224	21		2	9	0.328205	11
	0.9	9	0.3414	10		1.7	8	0.267368	22		2.8	3	0.605104	11
	0.9	9	0.351595	11		1.7	8	0.786475	23		2.8	3	0.556897	17
	0.9	9	0.359505	12		1.7	8	0.480269	25		2.8	3	0.895631	19
	0.9	9	0.506951	13		1.7	9	0.47203	1		2	9	0.416547	12
	0.9	9	0.406352	14		1.7	9	0.32642	2		2.8	3	0.628814	20
	0.9	9	0.347519	15		1.7	9	0.388125	3		2.8	3	0.481481	22
	0.9	9	0.478802	16		1.7	9	0.330313	4		2.8	3	0.552588	23
	0.9	9	0.385104	17		1.7	9	0.508108	5		2.8	6	0.41816	1
	0.9	9	0.481264	18		1.7	9	0.436093	6		2.8	6	0.281301	3
	0.9	9	0.303523	19		1.7	9	0.316393	7		2.8	6	0.3408	4
	0.5	6	0.50959	12		1.7	9	0.245868	8		2.8	6	0.451904	6
	0.9	9	0.429811	20		1.7	9	0.272222	9		2.8	6	0.564865	7
	0.9	9	0.439731	21		1.7	9	0.377551	10		2.8	6	0.383149	8
	0.9	9	0.341567	22		1.7	9	0.322671	11		2.8	6	0.317424	9
	0.9	9	0.375812	23		1.7	9	0.250291	12		2.8	6	0.547573	10
	0.9	9	0.445733	24		1.7	9	0.471676	13		2.8	6	0.305039	11
	0.9	9	0.221535	25		1.7	9	0.236111	14		2.8	6	0.36674	12
	1	3	0.365355	1		1.7	9	0.313333	15		2.8	6	0.62036	13
	1	3	0.318287	3		1.7	9	0.36601	16		2.8	6	0.629305	14
	1	3	0.541636	4		1.7	9	0.272642	17		2.8	6	0.728769	15
	0.5	6	0.763789	13		1.7	9	0.445205	18		2.8	6	0.650095	16
	1	3	0.69371	5		1.7	9	0.225321	19		2.8	6	0.41057	17
	1	3	0.634594	6		1.5	5	0.818692	2		2.8	6	0.548333	18
	1	3	0.488293	8		1.7	9	0.422024	20		2.8	6	0.602888	19
	1	3	0.497757	9		1.7	9	0.236364	21		2.8	6	0.358848	20
	1	3	0.708521	10		1.7	9	0.258756	22		2.8	6	0.309653	21
	1	3	0.600506	11		1.7	9	0.783811	23		2.8	6	0.209831	22
	1	3	0.635437	12		1.7	9	0.598711	24		2.8	6	0.303587	23
	1	3	0.481975	15		1.7	9	0.408465	25		2	9	0.418246	15
	1	3	0.878321	17		1.8	3	0.674324	2		2.8	6	0.263291	25
	1	3	0.729745	18		1.5	5	0.756944	3		2.8	9	0.30129	1
	1	3	0.51689	19		1.8	3	0.682372	7		2.8	9	0.815972	2
	1	3	0.64527	22		1.8	3	0.573464	8		2.8	9	0.194393	3
	0.5	3	0.7724	4		1.8	3	0.568265	11		2.8	9	0.246429	4
	1	6	0.274383	1		1.8	3	0.364957	12		2.8	9	0.450914	5
	1	6	0.355317	2		1.8	3	0.698758	21		2.8	9	0.282474	6
	1	6	0.285384	3		1.8	4	0.674672	2		2.8	9	0.327513	7
	1	6	0.311876	4		1.8	4	0.388261	7		2.8	9	0.230068	8
	1	6	0.6749	5		1.8	4	0.378797	8		2.8	9	0.204938	9
	1	6	0.476791	6		1.8	4	0.514431	11		2.8	9	0.374634	10
	1	6	0.390845	8		1.8	4	0.315328	12		2.8	9	0.210215	11
	1	6	0.442923	9		1.8	4	0.467576	14		2.8	9	0.253125	12
	1	6	0.451487	10		1.8	4	0.477778	16		2.8	9	0.4	13
	1	6	0.484432	11		1.5	5	0.725956	7		2.8	9	0.400251	14
	1	6	0.361329	12		1.8	4	0.518632	21		2.8	9	0.231783	15
	1	6	0.556005	13		1.8	5	0.469744	2		2.8	9	0.304147	16
	1	6	0.552144	14		1.8	5	0.406022	3		2.8	9	0.243878	17
	1	6	0.478195	15		1.8	5	0.612413	4		2.8	9	0.29949	18
	1	6	0.551634	17		1.5	5	0.462136	8		2.8	9	0.256532	19
	1	6	0.581273	18		1.8	5	0.542089	6		2	9	0.490043	17
	1	6	0.385477	19		1.8	5	0.375188	7		2.8	9	0.302548	20
	1	6	0.426539	20		1.8	5	0.319745	8		2.8	9	0.210833	21
	1	6	0.482627	21		1.8	5	0.548108	9		2.8	9	0.161782	22
	1	6	0.403001	22		1.8	5	0.49858	11		2.8	9	0.264145	23
	1	6	0.440916	23		1.8	5	0.26374	12		2.8	9	0.871826	24
	1	6	0.255503	25		1.8	5	0.758113	13		2.8	9	0.163415	25
	1	9	0.245863	1		1.8	5	0.300256	14		2.9	3	0.459434	3
	1	9	0.347268	2		1.8	5	0.454569	16		2.9	3	0.514939	4
	1	9	0.281533	3		1.8	5	0.412634	21		2	9	0.995137	18
	1	9	0.297245	4		1.8	5	0.675465	22		2.9	3	0.906993	6
	1	9	0.357736	5		1.8	5	0.610423	25		2.9	3	0.383442	9
	1	9	0.396296	6		1.8	6	0.430409	2		2.9	3	0.533099	11
	1	9	0.865093	7		1.8	6	0.394937	3		2	9	0.590602	19
	1	9	0.295953	8		1.8	6	0.420244	4		2.9	3	0.761494	15
	1	9	0.298776	9		1.8	6	0.545745	6		2.9	3	0.509041	17
	1	9	0.300713	10		1.8	6	0.368717	7		2.9	3	0.753962	19
	1	9	0.3215	11		1.8	6	0.291892	8		2.9	3	0.603041	20
	1	9	0.317726	12		1.8	6	0.500743	9		2.9	3	0.437273	22
	1	9	0.469543	13		1.8	6	0.837107	10		2.9	3	0.51726	23
	1	9	0.357627	14		1.8	6	0.439385	11		2.9	6	0.398828	1
	0.5	6	0.7674	19		1.8	6	0.260429	12		2.9	6	0.267066	3
	1	9	0.324662	15		1.8	6	0.507656	13		2.9	6	0.318155	4
	1	9	0.431637	16		1.8	6	0.26455	14		2.9	6	0.416007	6
	1	9	0.334748	17		1.8	6	0.569792	15		2.9	6	0.525551	7
	1	9	0.387977	18		1.8	6	0.3875	16		2.9	6	0.352301	8
	1	9	0.2635	19		1.8	6	0.471429	17		2.9	6	0.302333	9
	1	9	0.402055	20		1.8	6	0.516339	18		2	9	0.380601	21
	1	9	0.417421	21		1.8	6	0.414773	19		2.9	6	0.473665	10
	1	9	0.31763	22		1.5	5	0.352871	12		2.9	6	0.289151	11
	1	9	0.332786	23		1.8	6	0.464103	20		2.9	6	0.352408	12
	1	9	0.4249	24		1.8	6	0.335766	21		2.9	6	0.530165	13
	1	9	0.208233	25		1.8	6	0.275815	22		2.9	6	0.583008	14
	1.1	3	0.346775	1		1.8	6	0.566216	25		2.9	6	0.609081	15
	1.1	3	0.306514	3		1.8	7	0.601935	1		2.9	6	0.559254	16
	1.1	3	0.5174	4		1.8	7	0.405882	2		2.9	6	0.400614	17
	1.1	3	0.627215	5		1.8	7	0.381638	3		2.9	6	0.513303	18
	1.1	3	0.577776	6		1.8	7	0.387861	4		2.9	6	0.564305	19
	1.1	3	0.423522	8		1.8	7	0.502049	6		2	9	0.24	22
	1.1	3	0.451487	9		1.8	7	0.332963	7		2.9	6	0.337805	20
	0.5	6	0.784515	21		1.8	7	0.25873	8		2.9	6	0.297333	21
	1.1	3	0.649007	10		1.8	7	0.29188	9		2.9	6	0.205446	22
	1.1	3	0.568852	11		1.8	7	0.409908	10		2.9	6	0.289216	23
	1.1	3	0.577359	12		1.8	7	0.428261	11		2.9	6	0.251075	25
	1.1	3	0.462459	15		1.8	7	0.241667	12		2.9	9	0.275954	1
	1.1	3	0.732687	17		1.8	7	0.501549	13		2.9	9	0.776174	2
	1.1	3	0.671718	18		1.8	7	0.253788	14		2.9	9	0.188835	3
	1.1	3	0.463824	19		1.5	5	0.415	14		2.9	9	0.234496	4
	0.5	6	0.768199	22		1.8	7	0.505799	15		2	9	0.440683	23
	1.1	3	0.599573	22		1.8	7	0.373196	16		2.9	9	0.414739	5
	1.1	6	0.254292	1		1.8	7	0.384836	17		2.9	9	0.260882	6
	1.1	6	0.334567	2		1.8	7	0.488614	18		2.9	9	0.308929	7
	1.1	6	0.271196	3		1.8	7	0.298246	19		2.9	9	0.219178	8
	1.1	6	0.292453	4		1.8	7	0.416062	20		2.9	9	0.200362	9
	0.5	6	0.670953	23		1.8	7	0.295909	21		2.9	9	0.356798	10
	1.1	6	0.56018	5		1.8	7	0.258685	22		2.9	9	0.203037	11
	1.1	6	0.40818	6		1.8	7	0.627644	23		2.9	9	0.241667	12
	1.1	6	0.366338	8		1.8	7	0.471012	25		2.9	9	0.36789	13
	1.1	6	0.411507	9		1.8	8	0.51314	1		2.9	9	0.37193	14
	1.1	6	0.365285	10		1.8	8	0.380503	2		2.9	9	0.222464	15
	1.1	6	0.441219	11		1.8	8	0.368029	3		2.9	9	0.282377	16
	1.1	6	0.323584	12		1.8	8	0.36725	4		2.9	9	0.227778	17
	1.1	6	0.509439	13		1.8	8	0.561168	5		2.9	9	0.273841	18
	1.1	6	0.507268	14		1.8	8	0.42907	6		2.9	9	0.247917	19
	1.1	6	0.453409	15		1.8	8	0.30733	7		2.9	9	0.272424	20
	1.1	6	0.477791	17		1.8	8	0.255462	8		2.9	9	0.203488	21
	1.1	6	0.505456	18		1.8	8	0.270175	9		2.9	9	0.156211	22
	1.1	6	0.356593	19		1.8	8	0.382895	10		2.9	9	0.252928	23
	1.1	6	0.3999	20		1.8	8	0.414463	11		2.9	9	0.648193	24
	1.1	6	0.454092	21		1.8	8	0.238764	12		2	9	0.234615	25
	1.1	6	0.3774	22		1.8	8	0.481845	13		2.9	9	0.15975	25
	1.1	6	0.414365	23		1.8	8	0.233	14		3	3	0.440523	3
	0.5	6	0.408955	25		1.8	8	0.364167	15		3	3	0.496855	4
	1.1	6	0.23903	25		1.8	8	0.363147	16		3	3	0.677367	6
	1.1	9	0.227958	1		1.8	8	0.301869	17		3	3	0.712269	8
	1.1	9	0.297473	2		1.8	8	0.41348	18		3	3	0.365736	9
	1.1	9	0.266998	3		1.8	8	0.254861	19		3	3	0.505155	11
	1.1	9	0.281639	4		1.8	8	0.412694	20		3	3	0.923882	12
	1.1	9	0.331583	5		1.8	8	0.241204	21		3	3	0.697318	15
	1.1	9	0.345465	6		1.8	8	0.254339	22		3	3	0.475225	17
	1.1	9	0.597943	7		1.8	8	0.587151	23		3	3	0.696117	19
	1.1	9	0.276959	8		1.8	8	0.636364	24		3	3	0.553753	20
	1.1	9	0.269625	9		1.8	8	0.417742	25		3	3	0.409609	22
	0.5	9	0.465648	1		1.8	9	0.369886	1		3	3	0.478571	23
	1.1	9	0.262289	10		1.8	9	0.297788	2		3	6	0.36484	1
	1.1	9	0.305163	11		1.8	9	0.354234	3		3	6	0.257143	3
	1.1	9	0.291204	12		1.8	9	0.305236	4		3	6	0.302941	4
	1.1	9	0.440285	13		1.8	9	0.4675	5		3	6	0.394792	6
	1.1	9	0.330053	14		1.8	9	0.385	6		3	6	0.467148	7
	1.1	9	0.314079	15		1.8	9	0.295588	7		3	6	0.325238	8
	1.1	9	0.395812	16		1.8	9	0.224359	8		3	6	0.278618	9
	1.1	9	0.299319	17		1.8	9	0.253318	9		3	6	0.432843	10
	1.1	9	0.357946	18		1.8	9	0.350599	10		3	6	0.271386	11
	1.1	9	0.242208	19		1.8	9	0.309762	11		3	6	0.326488	12
	0.5	9	0.549283	2		1.8	9	0.230417	12		3	6	0.467669	13
	1.1	9	0.365148	20		1.8	9	0.409794	13		3	6	0.561015	14
	1.1	9	0.3949	21		1.8	9	0.223125	14		3	6	0.567353	15
	1.1	9	0.296491	22		1.8	9	0.285769	15		3	6	0.520518	16
	1.1	9	0.308464	23		1.8	9	0.342373	16		3	6	0.362402	17
	1.1	9	0.392049	24		1.8	9	0.250602	17		3	6	0.478037	18
	1.1	9	0.1954	25		1.8	9	0.372789	18		3	6	0.550498	19
	1.2	3	0.330794	1		1.8	9	0.211562	19		3	6	0.316026	20
	1.2	3	0.291204	3		1.8	9	0.380723	20		3	6	0.270205	21
	1.2	3	0.484152	4		1.8	9	0.217568	21		3	6	0.196296	22
	0.5	9	0.420709	3		1.8	9	0.245669	22		3	6	0.271759	23
	1.2	3	0.521947	5		1.8	9	0.608935	23		3	6	0.241284	25
	1.2	3	0.549351	6		1.8	9	0.535	24		3	9	0.259653	1
	1.2	3	0.39424	8		1.8	9	0.377688	25		3	9	0.751439	2
	1.2	3	0.409306	9		1.9	3	0.607965	2		3	9	0.17594	3
	1.2	3	0.607984	10		1.9	3	0.566757	7		3	9	0.218263	4
	1.2	3	0.508182	11		1.9	3	0.506466	8		3	9	0.387576	5
	1.2	3	0.507158	12		1.9	3	0.667466	9		3	9	0.249315	6
	0.5	9	0.490953	4		1.5	5	0.935455	21		3	9	0.29875	7
	1.2	3	0.425257	15		1.9	3	0.492737	11		3	9	0.212366	8
	1.2	3	0.696017	17		1.9	3	0.341304	12		3	9	0.18835	9
	1.2	3	0.563114	18		1.9	3	0.647635	14		3	9	0.328618	10
	1.2	3	0.428055	19		1.9	3	0.601154	21		3	9	0.198125	11
	1.2	3	0.573599	22		1.9	3	0.741447	22		3	9	0.232377	12
	0.5	9	0.648737	5		1.9	4	0.605649	2		3	9	0.348374	13
	1.2	6	0.242923	1		1.9	4	0.550158	3		3	9	0.350536	14
	1.2	6	0.313789	2		1.9	4	0.701636	6		3	9	0.214535	15
	1.2	6	0.258139	3		1.9	4	0.347619	7		3	9	0.268387	16
	1.2	6	0.27531	4		1.9	4	0.342593	8		3	9	0.215351	17
	1.2	6	0.514131	5		1.9	4	0.630478	9		3	9	0.257471	18
	1.2	6	0.367734	6		1.9	4	0.470168	11		3	9	0.232143	19
	1.2	6	0.344662	8		1.9	4	0.301531	12		3	9	0.261264	20
	1.2	6	0.388789	9		1.9	4	0.389431	14		3	9	0.199286	21
	1.2	6	0.331551	10		1.9	4	0.423714	16		3	9	0.153571	22
	1.2	6	0.414689	11		1.9	4	0.605389	17		3	9	0.246078	23
	1.2	6	0.297627	12		1.9	4	0.432456	21		3	9	0.595228	24
	1.2	6	0.478762	13		1.9	4	0.69768	22		3	9	0.157246	25
	1.2	6	0.431229	14		1.9	4	0.756811	25		3.1	3	0.94548	10
	1.2	6	0.417078	15		1.9	5	0.406122	2		3.2	6	0.323602	1
	1.2	6	0.55073	16		1.9	5	0.375668	3		3.2	6	0.926512	2
	1.2	6	0.415406	17		1.9	5	0.471992	4		3.2	6	0.228571	3
	1.2	6	0.444067	18		1.9	5	0.441154	6		3.2	6	0.276172	4
	1.2	6	0.326239	19		1.9	5	0.338095	7		3.2	6	0.352	6
	1.2	6	0.371224	20		1.9	5	0.2895	8		3.2	6	0.371302	7
	1.2	6	0.422248	21		1.9	5	0.45125	9		3.2	6	0.298958	8
	1.2	6	0.351453	22		1.9	5	0.4625	11		3.2	6	0.254605	9
	1.2	6	0.3874	23		1.9	5	0.251307	12		3.1	3	0.462274	11
	1.2	6	0.2249	25		1.9	5	0.523118	13		3.2	6	0.394853	10
	1.2	9	0.211872	1		1.9	5	0.274333	14		3.2	6	0.256769	11
	1.2	9	0.269041	2		1.9	5	0.551245	15		3.2	6	0.294505	12
	1.2	9	0.255191	3		1.9	5	0.411521	16		3.2	6	0.383333	13
	1.2	9	0.266444	4		1.9	5	0.550303	17		3.2	6	0.4625	14
	0.5	9	0.744782	8		1.9	5	0.6744	18		3.2	6	0.515351	15
	1.2	9	0.3119	5		1.9	5	0.760299	19		3.2	6	0.401642	16
	1.2	9	0.306342	6		1.5	6	0.711165	2		3.2	6	0.315544	17
	1.2	9	0.551505	7		1.9	5	0.919307	20		3.2	6	0.407282	18
	1.2	9	0.263174	8		1.9	5	0.375987	21		3.2	6	0.473544	19
	1.2	9	0.2474	9		1.9	5	0.487013	22		3.1	3	0.706566	12
	1.2	9	0.246103	10		1.9	5	0.790871	23		3.2	6	0.295679	20
	1.2	9	0.285532	11		1.9	5	0.514568	25		3.2	6	0.250221	21
	1.2	9	0.27017	12		1.9	6	0.700716	1		3.2	6	0.183173	22
	1.2	9	0.414989	13		1.9	6	0.388235	2		3.2	6	0.251136	23
	1.2	9	0.314116	14		1.9	6	0.362174	3		3.2	6	0.901795	24
	0.5	9	0.717757	9		1.9	6	0.377344	4		3.2	6	0.22197	25
	1.2	9	0.304445	15		1.5	6	0.586774	3		3.2	9	0.23427	1
	1.2	9	0.366864	16		1.9	6	0.437302	6		3.2	9	0.620281	2
	1.2	9	0.267849	17		1.9	6	0.334884	7		3.2	9	0.16338	3
	1.2	9	0.325424	18		1.9	6	0.268671	8		3.2	9	0.207014	4
	1.2	9	0.219702	19		1.9	6	0.43	9		3.2	9	0.356557	5
	1.2	9	0.342757	20		1.9	6	0.651404	10		3.2	9	0.218468	6
	1.2	9	0.36412	21		1.9	6	0.415134	11		3.2	9	0.263087	7
	1.2	9	0.265987	22		1.9	6	0.244444	12		3.2	9	0.20131	8
	1.2	9	0.286823	23		1.9	6	0.442276	13		3.2	9	0.173437	9
	1.2	9	0.370705	24		1.9	6	0.251339	14		3.2	9	0.301017	10
	0.5	9	0.603471	10		1.9	6	0.493353	15		3.2	9	0.179213	11
	1.2	9	0.182728	25		1.9	6	0.365962	16		3.2	9	0.218929	12
	1.3	3	0.311885	1		1.9	6	0.422039	17		3.2	9	0.30293	13
	1.3	3	0.276923	3		1.9	6	0.445588	18		3.2	9	0.308071	14
	1.3	3	0.463704	4		1.9	6	0.363991	19		3.2	9	0.202643	15
	1.3	3	0.484234	5		1.9	6	0.398065	20		3.2	9	0.249286	16
	1.3	3	0.440268	6		1.9	6	0.315649	21		3.2	9	0.204872	17
	1.3	3	0.368443	8		1.9	6	0.261194	22		3.2	9	0.234574	18
	1.3	3	0.382716	9		1.9	6	0.694972	23		3.2	9	0.207803	19
	0.5	9	0.652579	11		1.9	6	0.46032	25		3.2	9	0.246629	20
	1.3	3	0.569811	10		1.9	7	0.528537	1		3.2	9	0.174038	21
	1.3	3	0.475	11		1.9	7	0.365988	2		3.2	9	0.14759	22
	1.3	3	0.470408	12		1.9	7	0.354562	3		3.2	9	0.221377	23
	1.3	3	0.391518	15		1.9	7	0.364815	4		3.2	9	0.451496	24
	1.3	3	0.657042	17		1.9	7	0.633929	5		3.1	3	0.605098	15
	1.3	3	0.503846	18		1.9	7	0.427083	6		3.2	9	0.152905	25
	1.3	3	0.401773	19		1.9	7	0.306857	7		3.3	3	0.361538	3
	0.5	9	0.505257	12		1.9	7	0.246759	8		3.3	3	0.423529	4
	1.3	3	0.532095	22		1.9	7	0.264828	9		3.3	3	0.546652	6
	1.3	6	0.232828	1		1.9	7	0.374679	10		3.3	3	0.768493	7
	1.3	6	0.292647	2		1.9	7	0.406631	11		3.3	3	0.525	8
	1.3	6	0.246396	3		1.9	7	0.221875	12		3.3	3	0.321168	9
	1.3	6	0.262132	4		1.9	7	0.439695	13		3.1	3	0.87161	16
	1.3	6	0.476562	5		1.9	7	0.237407	14		3.3	3	0.866232	10
	1.3	6	0.342453	6		1.9	7	0.41599	15		3.3	3	0.408566	11
	1.3	6	0.623098	7		1.9	7	0.353213	16		3.3	3	0.65259	12
	1.3	6	0.330102	8		1.9	7	0.344954	17		3.3	3	0.926144	14
	1.3	6	0.349333	9		1.9	7	0.407759	18		3.3	3	0.543316	15
	1.3	6	0.307917	10		1.9	7	0.271714	19		3.3	3	0.811892	16
	1.3	6	0.390066	11		1.5	6	0.648039	7		3.3	3	0.417143	17
	1.3	6	0.274432	12		1.9	7	0.378652	20		3.3	3	0.660274	18
	1.3	6	0.455882	13		1.9	7	0.276042	21		3.3	3	0.580508	19
	1.3	6	0.399558	14		1.9	7	0.24693	22		3.1	3	0.455362	17
	1.3	6	0.385656	15		1.9	7	0.548571	23		3.3	3	0.504211	20
	1.3	6	0.456103	16		1.9	7	0.706695	24		3.3	3	0.945518	21
	1.3	6	0.364724	17		1.9	7	0.420332	25		3.3	3	0.354596	22
	1.3	6	0.404088	18		1.9	8	0.412304	1		3.3	3	0.411417	23
	1.3	6	0.3044	19		1.9	8	0.334024	2		3.3	6	0.307246	1
	1.3	6	0.343077	20		1.9	8	0.340333	3		3.3	6	0.902821	2
	1.3	6	0.406291	21		1.9	8	0.342806	4		3.3	6	0.217105	3
	1.3	6	0.313028	22		1.5	6	0.448201	8		3.3	6	0.264201	4
	1.3	6	0.358134	23		1.9	8	0.504803	5		3.1	3	0.802031	18
	1.3	6	0.625	24		1.9	8	0.385315	6		3.3	6	0.324561	6
	0.5	9	0.4999	15		1.9	8	0.284322	7		3.3	6	0.354864	7
	1.3	6	0.212832	25		1.9	8	0.239604	8		3.3	6	0.277097	8
	1.3	9	0.201079	1		1.9	8	0.25	9		3.3	6	0.250943	9
	1.3	9	0.249074	2		1.9	8	0.357102	10		3.3	6	0.373834	10
	1.3	9	0.24031	3		1.9	8	0.38494	11		3.3	6	0.24697	11
	1.3	9	0.253352	4		1.9	8	0.222015	12		3.3	6	0.276336	12
	1.3	9	0.293	5		1.9	8	0.428082	13		3.3	6	0.362397	13
	1.3	9	0.28087	6		1.9	8	0.220066	14		3.3	6	0.419748	14
	1.3	9	0.515789	7		1.9	8	0.325	15		3.1	3	0.661085	19
	1.3	9	0.250368	8		1.9	8	0.337153	16		3.3	6	0.478112	15
	1.3	9	0.2335	9		1.9	8	0.266518	17		3.3	6	0.367925	16
	1.3	9	0.22907	10		1.9	8	0.371667	18		3.3	6	0.302264	17
	1.3	9	0.2664	11		1.9	8	0.236726	19		3.3	6	0.384524	18
	1.3	9	0.25119	12		1.9	8	0.374855	20		3.3	6	0.423846	19
	1.3	9	0.403687	13		1.9	8	0.224545	21		3.3	6	0.277876	20
	1.3	9	0.302878	14		1.9	8	0.23855	22		3.3	6	0.231319	21
	1.3	9	0.280645	15		1.9	8	0.527128	23		3.3	6	0.176289	22
	1.3	9	0.35	16		1.9	8	0.57109	24		3.3	6	0.236937	23
	1.3	9	0.25122	17		1.9	8	0.389571	25		3.3	6	0.869087	24
	1.3	9	0.311491	18		1.9	9	0.336093	1		3.1	3	0.531136	20
	1.3	9	0.205085	19		1.9	9	0.269186	2		3.3	6	0.212745	25
	0.5	9	0.875809	17		1.9	9	0.329781	3		3.3	9	0.221304	1
	1.3	9	0.325214	20		1.9	9	0.286913	4		3.3	9	0.593946	2
	1.3	9	0.352143	21		1.9	9	0.422167	5		3.3	9	0.160784	3
	1.3	9	0.25241	22		1.9	9	0.333459	6		3.3	9	0.203086	4
	1.3	9	0.267105	23		1.9	9	0.272951	7		3.3	9	0.3476	5
	1.3	9	0.356	24		1.9	9	0.2135	8		3.3	9	0.211986	6
	1.3	9	0.171154	25		1.9	9	0.230859	9		3.3	9	0.259946	7
	1.4	3	0.298171	1		1.9	9	0.330851	10		3.3	9	0.195349	8
	1.4	3	0.643243	2		1.9	9	0.289908	11		3.3	9	0.168485	9
	1.4	3	0.264201	3		1.9	9	0.217045	12		3.3	9	0.300136	10
	1.4	3	0.446429	4		1.9	9	0.375316	13		3.3	9	0.173158	11
	1.4	3	0.45709	5		1.9	9	0.213584	14		3.3	9	0.215205	12
	1.4	3	0.378477	6		1.9	9	0.266794	15		3.3	9	0.283582	13
	1.4	3	0.345192	8		1.9	9	0.313859	16		3.3	9	0.301246	14
	1.4	3	0.355	9		1.9	9	0.230303	17		3.3	9	0.201163	15
	1.4	3	0.539565	10		1.9	9	0.337895	18		3.3	9	0.231313	16
	1.4	3	0.444966	11		1.9	9	0.203941	19		3.3	9	0.200732	17
	1.4	3	0.41125	12		1.5	6	0.327239	12		3.3	9	0.224762	18
	1.4	3	0.775591	14		1.9	9	0.342771	20		3.3	9	0.200284	19
	0.5	9	0.597096	19		1.9	9	0.203896	21		3.1	3	0.391473	22
	1.4	3	0.367969	15		1.9	9	0.230645	22		3.3	9	0.227966	20
	1.4	3	0.614894	17		1.9	9	0.503947	23		3.3	9	0.166525	21
	1.4	3	0.47	18		1.9	9	0.510959	24		3.3	9	0.146273	22
	1.4	3	0.373404	19		1.9	9	0.357008	25		3.3	9	0.214333	23
	1.4	3	0.505412	22		1.5	6	0.34125	14		3.3	9	0.416798	24
	0.5	9	0.829312	20		1.5	6	0.920415	16		3.3	9	0.149032	25
	1.4	6	0.215774	1		1.5	6	0.49812	21		3.4	3	0.656969	1
	1.4	6	0.273611	2		1.5	6	0.356466	22		3.4	3	0.998867	2
	1.4	6	0.2348	3		2	6	0.415957	25		3.4	3	0.35191	3
	1.4	6	0.252035	4		2	7	0.50074	1		3.4	3	0.406818	4
	1.4	6	0.440722	5		2	7	0.331522	2		3.1	3	0.455479	23
	1.4	6	0.308982	6		2	7	0.328723	3		3.4	3	0.509046	6
	1.4	6	0.559487	7		2	7	0.350202	4		3.4	3	0.725356	7
	1.4	6	0.308879	8		2	7	0.581905	5		3.4	3	0.501535	8
	1.4	6	0.315432	9		2	7	0.395909	6		3.4	3	0.309459	9
	0.5	9	0.725971	21		2	7	0.284071	7		3.4	3	0.660821	10
	1.4	6	0.292056	10		2	7	0.225342	8		3.4	3	0.386154	11
	1.4	6	0.371739	11		2	7	0.246552	9		3.4	3	0.494815	12
	1.4	6	0.258511	12		2	3	0.456494	11		3.4	3	0.516949	15
	1.4	6	0.426154	13		2	7	0.353234	10		3.4	3	0.557197	16
	1.4	6	0.370642	14		2	7	0.382595	11		3.4	3	0.401972	17
	1.4	6	0.368354	15		2	7	0.211905	12		3.4	3	0.641556	18
	1.4	6	0.405963	16		2	7	0.404645	13		3.4	3	0.55589	19
	1.4	6	0.337156	17		2	7	0.224046	14		3.4	3	0.479353	20
	1.4	6	0.376744	18		2	7	0.382979	15		3.4	3	0.762702	21
	1.4	6	0.275743	19		2	7	0.328378	16		3.4	3	0.345455	22
	0.5	9	0.5299	22		2	7	0.313699	17		3.4	3	0.399554	23
	1.4	6	0.323188	20		2	7	0.368421	18		3.4	6	0.293434	1
	1.4	6	0.395055	21		2	7	0.253571	19		3.4	6	0.86422	2
	1.4	6	0.299	22		2	3	0.320803	12		3.4	6	0.206356	3
	1.4	6	0.316561	23		2	7	0.352404	20		3.4	6	0.252489	4
	1.4	6	0.579197	24		2	7	0.262183	21		3.4	6	0.309544	6
	1.4	6	0.203659	25		2	7	0.229882	22		3.4	6	0.328626	7
	1.4	9	0.195049	1		2	7	0.491367	23		3.4	6	0.261399	8
	1.4	9	0.23114	2		2	7	0.564419	24		3.4	6	0.234298	9
	1.4	9	0.229545	3		2	7	0.398344	25		3.1	6	0.351558	1
	1.4	9	0.237736	4		2	8	0.367662	1		3.4	6	0.358478	10
	0.5	9	0.613625	23		2	8	0.30684	2		3.4	6	0.234706	11
	1.4	9	0.27875	5		2	8	0.316818	3		3.4	6	0.265094	12
	1.4	9	0.261397	6		2	8	0.316954	4		3.4	6	0.34125	13
	1.4	9	0.4625	7		2	8	0.431667	5		3.4	6	0.404332	14
	1.4	9	0.231696	8		2	8	0.359309	6		3.4	6	0.425907	15
	1.4	9	0.219141	9		2	8	0.264286	7		3.4	6	0.354561	16
	1.4	9	0.213571	10		2	8	0.220238	8		3.4	6	0.287597	17
	1.4	9	0.249545	11		2	8	0.226056	9		3.4	6	0.354687	18
	1.4	9	0.235526	12		2	8	0.345	10		3.4	6	0.406014	19
	1.4	9	0.375685	13		2	8	0.363278	11		3.4	6	0.265	20
	1.4	9	0.278788	14		2	8	0.212658	12		3.4	6	0.227108	21
	0.5	9	0.720061	24		2	8	0.404713	13		3.4	6	0.169	22
	1.4	9	0.268142	15		2	8	0.210294	14		3.4	6	0.231034	23
	1.4	9	0.325497	16		2	3	0.520297	14		3.4	6	0.724313	24
	1.4	9	0.228241	17		2	8	0.305	15		3.4	6	0.205988	25
	1.4	9	0.294964	18		2	8	0.318718	16		3.4	9	0.212411	1
	1.4	9	0.19382	19		2	8	0.250521	17		3.4	9	0.548641	2
	1.4	9	0.30979	20		2	8	0.348851	18		3.4	9	0.156522	3
	1.4	9	0.333333	21		2	8	0.221429	19		3.4	9	0.201744	4
	1.4	9	0.224706	22		2	8	0.342667	20		3.1	6	0.244937	3
	1.4	9	0.257429	23		2	8	0.21014	21		3.4	9	0.332877	5
	1.4	9	0.343	24		2	8	0.226286	22		3.4	9	0.202215	6
	0.5	9	0.335065	25		2	8	0.456471	23		3.4	9	0.255825	7
	1.4	9	0.160476	25		2	8	0.550893	24		3.4	9	0.184066	8
	1.5	3	0.289687	1		2	8	0.361686	25		3.4	9	0.162575	9
	1.5	3	0.553279	2		2	9	0.301263	1		3.4	9	0.273361	10
	1.5	3	0.256486	3		2	9	0.252525	2		3.4	9	0.168182	11
	1.5	3	0.423228	4		2	9	0.310331	3		3.4	9	0.207534	12
	1.5	3	0.430978	5		2	9	0.27013	4		3.4	9	0.269935	13
	1.5	3	0.352381	6		2	9	0.386824	5		3.4	9	0.277143	14
	1.5	3	0.329358	8		2	9	0.308092	6		3.1	6	0.286404	4
	1.5	3	0.328922	9		2	9	0.259032	7		3.4	9	0.184694	15
	0.6	3	0.58291	1		2	9	0.204709	8		3.4	9	0.218359	16
	1.5	3	0.51478	10		2	9	0.214145	9		3.4	9	0.195082	17
	1.5	3	0.422302	11		2	9	0.316667	10		3.4	9	0.214394	18
	1.5	3	0.367834	12		2	9	0.273986	11		3.4	9	0.195062	19
	1.5	3	0.614651	14		2	9	0.207862	12		3.4	9	0.2172	20
	1.5	3	0.352439	15		2	9	0.351316	13		3.4	9	0.164138	21
	1.5	3	0.558955	17		2	9	0.205357	14		3.4	9	0.146181	22
	1.5	3	0.433582	18		2	9	0.253086	15		3.4	9	0.207459	23
	1.5	3	0.353481	19		2	9	0.303469	16		3.4	9	0.403444	24
	1.5	3	0.477953	22		2	9	0.212313	17		3.1	3	0.416588	3
	1.5	6	0.20407	1		2	9	0.312975	18		3.4	9	0.146129	25
	1.5	6	0.256132	2		2	9	0.193043	19		3.5	3	0.567655	1
	1.5	6	0.223741	3		2	9	0.322194	20		3.5	3	0.974578	2
	1.5	6	0.240206	4		2	9	0.194828	21		3.5	3	0.339823	3
	0.6	3	0.420953	3		2	9	0.220958	22		3.5	3	0.391667	4
	1.5	6	0.410072	5		2	9	0.454245	23		3.5	3	0.473384	6
	1.5	6	0.286017	6		2	9	0.441711	24		3.5	3	0.589951	7
	1.5	6	0.507065	7		2	9	0.337086	25		3.5	3	0.469048	8
	1.5	6	0.296835	8		2.1	3	0.450186	2		3.5	3	0.300502	9
	1.5	6	0.293258	9		2.1	3	0.62202	3		3.1	6	0.369518	6
	1.5	6	0.27619	10		2.1	3	0.659694	4		3.5	3	0.613472	10
	1.5	6	0.346154	11		2	3	0.702174	18		3.5	3	0.364085	11
	1.5	6	0.244715	12		2.1	3	0.510099	6		3.5	3	0.458306	12
	1.5	6	0.406886	13		2.1	3	0.435145	7		3.5	3	0.901748	14
	1.5	6	0.35843	14		2.1	3	0.389493	8		3.5	3	0.504835	15
	0.6	3	0.682795	4		2.1	3	0.533168	9		3.5	3	0.486911	16
	1.5	6	0.354913	15		2.1	3	0.431481	11		3.5	3	0.369289	17
	1.5	6	0.37246	16		2.1	3	0.306145	12		3.5	3	0.611458	18
	1.5	6	0.313636	17		2.1	3	0.425316	14		3.5	3	0.540798	19
	1.5	6	0.356552	18		2.1	3	0.5075	15		3.1	6	0.413189	7
	1.5	6	0.260563	19		2.1	3	0.654255	18		3.5	3	0.461667	20
	1.5	6	0.307485	20		2.1	3	0.633784	20		3.5	3	0.672143	21
	1.5	6	0.362676	21		2.1	3	0.419207	21		3.5	3	0.329008	22
	1.5	6	0.278832	22		2.1	3	0.501147	22		3.5	3	0.377879	23
	1.5	6	0.296087	23		2	3	0.507173	2		3.5	6	0.279643	1
	1.5	6	0.515938	24		2.1	4	0.65753	1		3.5	6	0.847937	2
	0.5	3	0.904473	8		2.1	4	0.420833	2		3.5	6	0.202994	3
	1.5	6	0.196581	25		2.1	4	0.427376	3		3.5	6	0.237156	4
	1.5	9	0.186436	1		2.1	4	0.57178	4		3.1	6	0.307773	8
	1.5	9	0.218121	2		2.1	4	0.437956	6		3.5	6	0.303939	6
	1.5	9	0.218108	3		2.1	4	0.302446	7		3.5	6	0.312887	7
	1.5	9	0.223413	4		2.1	4	0.302444	8		3.5	6	0.256809	8
	1.5	9	0.268898	5		2.1	4	0.50931	9		3.5	6	0.22439	9
	1.5	9	0.244608	6		2	3	0.488365	21		3.5	6	0.342544	10
	1.5	9	0.435274	7		2.1	4	0.419856	11		3.5	6	0.224731	11
	1.5	9	0.221032	8		2.1	4	0.262925	12		3.5	6	0.259635	12
	1.5	9	0.208633	9		2.1	4	0.721915	13		3.5	6	0.316129	13
	1.5	9	0.202229	10		2.1	4	0.318831	14		3.5	6	0.383807	14
	1.5	9	0.236555	11		2.1	4	0.461435	15		3.1	6	0.263743	9
	1.5	9	0.227778	12		2.1	4	0.36875	16		3.5	6	0.407627	15
	1.5	9	0.35604	13		2.1	4	0.402564	17		3.5	6	0.326774	16
	1.5	9	0.265909	14		2.1	4	0.633415	18		3.5	6	0.269792	17
	1.5	9	0.256667	15		2.1	4	0.507724	19		3.5	6	0.329487	18
	1.5	9	0.295833	16		2	3	0.553927	22		3.5	6	0.391367	19
	1.5	9	0.218182	17		2.1	4	0.465764	20		3.5	6	0.251456	20
	1.5	9	0.282589	18		2.1	4	0.355814	21		3.5	6	0.217982	21
	1.5	9	0.181308	19		2.1	4	0.471429	22		3.5	6	0.16413	22
	1.5	9	0.297034	20		2.1	4	0.483488	25		3.5	6	0.222541	23
	1.5	9	0.315455	21		2.1	5	0.576444	1		3.5	6	0.684014	24
	1.5	9	0.211224	22		2.1	5	0.336522	2		3.1	6	0.412862	10
	1.5	9	0.247126	23		2.1	5	0.335849	3		3.5	6	0.201036	25
	1.5	9	0.321032	24		2.1	5	0.381016	4		3.5	9	0.206169	1
	1.5	9	0.154545	25		2.1	5	0.373567	6		3.5	9	0.473859	2
	0.6	3	0.832795	8		2.1	5	0.297753	7		3.5	9	0.157143	3
	0.6	3	0.969243	12		2.1	5	0.254884	8		3.5	9	0.190625	4
	0.6	3	0.664067	15		2.1	5	0.378395	9		3.5	9	0.320109	5
	0.6	3	0.782173	19		2.1	5	0.412766	11		3.5	9	0.193421	6
	1.6	3	0.271552	1		2.1	5	0.222951	12		3.5	9	0.25	7
	1.6	3	0.494444	10		2.1	5	0.402817	13		3.5	9	0.179897	8
	1.7	6	0.193385	1		2.1	5	0.245635	14		3.5	9	0.156402	9
	1.7	6	0.230242	2		2.1	5	0.417056	15		3.1	6	0.260221	11
	1.7	6	0.208808	3		2.1	5	0.364823	16		3.5	9	0.266185	10
	1.7	6	0.217623	4		2.1	5	0.388073	17		3.5	9	0.162195	11
	1.7	6	0.35411	5		2.1	5	0.5525	18		3.5	9	0.202632	12
	1.7	6	0.25906	6		2.1	5	0.380952	19		3.5	9	0.260428	13
	1.7	6	0.427007	7		2.1	5	0.423214	20		3.5	9	0.274383	14
	1.7	6	0.269231	8		2.1	5	0.327823	21		3.5	9	0.176415	15
	1.7	6	0.262069	9		2.1	5	0.373485	22		3.5	9	0.215	16
	1.6	3	0.400467	11		2.1	5	0.573698	23		3.5	9	0.185	17
	1.7	6	0.246124	10		2.1	5	0.408235	25		3.5	9	0.209451	18
	1.7	6	0.318639	11		2.1	6	0.50798	1		3.5	9	0.187013	19
	1.7	6	0.226296	12		2.1	6	0.314213	2		3.1	6	0.308981	12
	1.7	6	0.367284	13		2.1	6	0.318925	3		3.5	9	0.214286	20
	1.7	6	0.309091	14		2.1	6	0.338489	4		3.5	9	0.159804	21
	1.7	6	0.324296	15		2.1	6	0.367376	6		3.5	9	0.139474	22
	1.7	6	0.327684	16		2.1	6	0.290196	7		3.5	9	0.205747	23
	1.7	6	0.277731	17		2.1	6	0.242523	8		3.5	9	0.384589	24
	1.7	6	0.323984	18		2.1	6	0.346903	9		3.5	9	0.142187	25
	1.7	6	0.230337	19		2.1	6	0.483235	10		3.1	6	0.419231	13
	1.6	3	0.329126	12		2.1	6	0.372162	11		3.1	6	0.509887	14
	1.7	6	0.2772	20		2.1	6	0.220922	12		3.1	3	0.470482	4
	1.7	6	0.325258	21		2.1	6	0.365414	13		3.1	6	0.550105	15
	1.7	6	0.257182	22		2.1	6	0.220186	14		3.1	6	0.450685	16
	1.7	6	0.264946	23		2.1	6	0.400186	15		3.1	6	0.35374	17
	1.7	6	0.475786	24		2.1	6	0.324107	16		3.1	6	0.428643	18
	1.7	6	0.178926	25		2.1	6	0.343056	17		3.1	6	0.510803	19
	1.7	9	0.169634	1		2.1	6	0.355742	18		3.1	6	0.306276	20
	1.7	9	0.204918	2		2.1	6	0.303241	19		3.1	6	0.259337	21
	1.7	9	0.203286	3		2	4	0.473101	2		3.1	6	0.19125	22
	1.7	9	0.205455	4		2.1	6	0.335311	20		3.1	6	0.261986	23
	1.7	9	0.241071	5		2.1	6	0.281308	21		3.1	6	0.95938	24
	1.7	9	0.216412	6		2.1	6	0.23609	22		3.1	6	0.2288	25
	1.7	9	0.385124	7		2.1	6	0.54	23		3.1	9	0.24863	1
	1.7	9	0.19703	8		2.1	6	0.628641	24		3.1	9	0.649145	2
	1.7	9	0.190698	9		2.1	6	0.386765	25		3.1	9	0.17	3
	1.7	9	0.188315	10		2.1	7	0.42246	1		3.1	9	0.211337	4
	1.7	9	0.214931	11		2.1	7	0.304608	2		3.1	9	0.364189	5
	1.7	9	0.202525	12		2.1	7	0.309722	3		3.1	9	0.233173	6
	1.7	9	0.319792	13		2.1	7	0.324425	4		3.1	9	0.276953	7
	1.7	9	0.239634	14		2	4	0.479959	3		3.1	9	0.207415	8
	1.6	3	0.557623	14		2.1	7	0.481073	5		3.1	9	0.178319	9
	1.7	9	0.231818	15		2.1	7	0.363961	6		3.1	3	0.628283	6
	1.7	9	0.267368	16		2.1	7	0.265705	7		3.1	9	0.312449	10
	1.7	9	0.195402	17		2.1	7	0.214689	8		3.1	9	0.19	11
	1.7	9	0.263782	18		2.1	7	0.224632	9		3.1	9	0.2264	12
	1.7	9	0.162613	19		2.1	7	0.333197	10		3.1	9	0.318939	13
	1.7	9	0.269424	20		2.1	7	0.359592	11		3.1	9	0.322051	14
	1.7	9	0.280978	21		2.1	7	0.202885	12		3.1	9	0.209296	15
	1.7	9	0.183108	22		2.1	7	0.369799	13		3.1	9	0.256154	16
	1.7	9	0.219266	23		2.1	7	0.213859	14		3.1	9	0.210526	17
	1.7	9	0.29898	24		2	4	0.623307	4		3.1	9	0.247802	18
	1.6	3	0.337054	15		2.1	7	0.359179	15		3.1	9	0.217308	19
	1.7	9	0.148358	25		2.1	7	0.314524	16		3.1	9	0.253386	20
	1.8	3	0.248256	1		2.1	7	0.292647	17		3.1	9	0.184211	21
	1.8	3	0.456818	2		2.1	7	0.343627	18		3.1	9	0.149112	22
	1.8	3	0.227953	3		2.1	7	0.234052	19		3.1	9	0.229795	23
	1.8	3	0.377642	4		2.1	7	0.328931	20		3.1	9	0.50069	24
	1.8	3	0.364486	5		2.1	7	0.246277	21		3.1	9	0.156118	25
	1.8	3	0.29375	6		2.1	7	0.220175	22		3.2	3	0.381419	3
	1.8	3	0.483898	7		2.1	7	0.4375	23		3.2	3	0.437126	4
	1.8	3	0.28883	8		2.1	7	0.530556	24		3.1	3	0.656391	8
	1.8	3	0.260331	9		2.1	7	0.363559	25		3.2	3	0.59125	6
	1.8	3	0.453571	10		2.1	8	0.329193	1		3.2	3	0.845186	7
	1.8	3	0.361919	11		2.1	8	0.277211	2		3.2	3	0.578112	8
	1.8	3	0.3	12		2.1	8	0.301333	3		3.2	3	0.339474	9
	1.8	3	0.496273	14		2.1	8	0.30393	4		3.2	3	0.902111	10
	1.8	3	0.312416	15		2.1	8	0.402966	5		3.2	3	0.438994	11
	1.8	3	0.432301	17		2.1	8	0.328968	6		3.2	3	0.667639	12
	1.8	3	0.369355	18		2.1	8	0.256461	7		3.1	3	0.355385	9
	1.8	3	0.302649	19		2.1	8	0.21125	8		3.2	3	0.567365	15
	1.6	3	0.50471	17		2.1	8	0.213202	9		3.2	3	0.861336	16
	1.8	3	0.573011	20		2	4	0.521579	6		3.2	3	0.436335	17
	1.8	3	0.608889	21		2.1	8	0.324324	10		3.2	3	0.690586	18
	1.8	3	0.382414	22		2.1	8	0.349194	11		3.2	3	0.633398	19
	1.8	3	0.743883	23		2.1	8	0.202813	12		3.2	3	0.514067	20
	1.8	6	0.189167	1		2.1	8	0.364368	13		3.2	3	0.364823	22
	1.8	6	0.221705	2		2.1	8	0.204951	14		3.2	3	0.437126	23
	1.8	6	0.202261	3		2.1	8	0.286058	15
	1.8	6	0.206452	4		2.1	8	0.306039	16
	1.6	3	0.411111	18		2.1	8	0.228899	17
	1.8	6	0.336893	5		2.1	8	0.3216	18
	1.8	6	0.239516	6		2.1	8	0.21213	19
	1.8	6	0.400955	7		2	4	0.318	7
	1.8	6	0.256148	8		2.1	8	0.321296	20
	1.8	6	0.244388	9		2.1	8	0.200299	21
	1.8	6	0.232963	10		2.1	8	0.215363	22
	1.8	6	0.302922	11		2.1	8	0.423967	23
	1.8	6	0.21381	12		2.1	8	0.474096	24
	1.8	6	0.352083	13		2.1	8	0.343254	25
	1.8	6	0.297778	14		2.1	9	0.278125	1
	1.6	3	0.328365	19		2.1	9	0.233471	2
	1.8	6	0.311724	15		2.1	9	0.288014	3
	1.8	6	0.306308	16		2.1	9	0.255556	4
	1.8	6	0.262587	17		2	4	0.316084	8
	1.8	6	0.306154	18		2.1	9	0.365128	5
	1.8	6	0.218807	19		2.1	9	0.280769	6
	1.8	6	0.2675	20		2.1	9	0.245732	7
	1.8	6	0.307282	21		2.1	9	0.192308	8
	1.8	6	0.24023	22		2.1	9	0.205122	9
	1.8	6	0.253846	23		2.1	9	0.305966	10
	1.8	6	0.462356	24		2.1	9	0.261471	11
	1.6	3	0.50289	2		2.1	9	0.201058	12
	1.8	6	0.174231	25		2.1	9	0.326953	13
	1.8	9	0.163736	1		2.1	9	0.197561	14
	1.8	9	0.192442	2		2	4	0.550812	9
	1.8	9	0.191579	3		2.1	9	0.237395	15
	1.8	9	0.201613	4		2.1	9	0.284328	16
	1.8	9	0.2345	5		2.1	9	0.206897	17
	1.8	9	0.210061	6		2.1	9	0.295755	18
	1.8	9	0.371667	7		2.1	9	0.180345	19
	1.8	9	0.192553	8		2.1	9	0.309048	20
	1.8	9	0.177895	9		2.1	9	0.183942	21
	1.8	9	0.182229	10		2.1	9	0.212842	22
	1.8	9	0.204276	11		2.1	9	0.419128	23
	1.8	9	0.2	12		2.1	9	0.418325	24
	1.8	9	0.303459	13		2.1	9	0.316667	25
	1.8	9	0.22402	14		2.2	3	0.411979	2
	1.8	9	0.219417	15		2.2	3	0.512898	3
	1.8	9	0.257277	16		2.2	3	0.620677	4
	1.8	9	0.184375	17		2.2	3	0.456915	6
	1.8	9	0.254494	18		2.2	3	0.411224	7
	1.8	9	0.15748	19		2.2	3	0.361502	8
	1.6	3	0.459062	22		2.2	3	0.506491	9
	1.8	9	0.257143	20		2	4	0.444771	11
	1.8	9	0.265596	21		2.2	3	0.412277	11
	1.8	9	0.178395	22		2.2	3	0.285784	12
	1.8	9	0.212171	23		2.2	3	0.389024	14
	1.8	9	0.28271	24		2.2	3	0.454444	15
	1.8	9	0.144346	25		2.2	3	0.544554	16
	1.9	3	0.246094	1		2.2	3	0.604313	18
	1.9	3	0.424823	2		2	4	0.278571	12
	1.9	3	0.221429	3		2.2	3	0.478882	20
	1.9	3	0.361268	4		2.2	3	0.361832	21
	1.9	3	0.354908	5		2.2	3	0.463409	22
	1.9	3	0.279268	6		2.2	3	0.713249	25
	1.9	3	0.455072	7		2.2	4	0.521163	1
	1.9	3	0.275773	8		2.2	4	0.389	2
	1.9	3	0.249398	9		2.2	4	0.402189	3
	1.9	3	0.43189	10		2.2	4	0.536364	4
	1.9	3	0.341447	11		2.2	4	0.413603	6
	1.9	3	0.279167	12		2.2	4	0.281532	7
	1.9	3	0.464848	14		2.2	4	0.280672	8
	1.9	3	0.304658	15		2.2	4	0.465524	9
	1.9	3	0.391818	17		2.2	4	0.403909	11
	1.9	3	0.353409	18		2.2	4	0.247807	12
	1.9	3	0.281081	19		2.2	4	0.537037	13
	1.9	3	0.525602	20		2.2	4	0.301344	14
	1.9	3	0.560577	21		2	4	0.356522	14
	1.9	3	0.35963	22		2.2	4	0.413218	15
	1.9	3	0.592905	23		2.2	4	0.355118	16
	1.9	3	0.615829	25		2.2	4	0.3625	17
	1.9	6	0.183684	1		2.2	4	0.569444	18
	1.9	6	0.212205	2		2.2	4	0.413942	19
	1.9	6	0.194393	3		2.2	4	0.420055	20
	1.9	6	0.2025	4		2.2	4	0.334483	21
	1.9	6	0.320248	5		2.2	4	0.428818	22
	1.9	6	0.228947	6		2.2	4	0.650683	23
	1.9	6	0.375253	7		2	4	0.580905	15
	1.9	6	0.244872	8		2.2	4	0.443258	25
	1.9	6	0.235514	9		2.2	5	0.506159	1
	1.6	6	0.198189	1		2.2	5	0.30671	2
	1.9	6	0.222541	10		2.2	5	0.320492	3
	1.9	6	0.29	11		2.2	5	0.359211	4
	1.9	6	0.206	12		2.2	5	0.345902	6
	1.9	6	0.336885	13		2.2	5	0.276894	7
	1.9	6	0.280315	14		2.2	5	0.236574	8
	1.9	6	0.301361	15		2.2	5	0.359649	9
	1.9	6	0.288321	16		2	4	0.397388	16
	1.9	6	0.253107	17		2.2	5	0.392466	11
	1.9	6	0.294643	18		2.2	5	0.215101	12
	1.9	6	0.21	19		2.2	5	0.363665	13
	1.6	6	0.246023	2		2.2	5	0.22947	14
	1.9	6	0.259375	20		2.2	5	0.382432	15
	1.9	6	0.293919	21		2.2	5	0.353435	16
	1.9	6	0.226344	22		2.2	5	0.353385	17
	1.9	6	0.246774	23		2.2	5	0.459071	18
	1.9	6	0.440789	24		2.2	5	0.338037	19
	1.9	6	0.165086	25		2	4	0.446875	17
	1.9	9	0.158475	1		2.2	5	0.370541	20
	1.9	9	0.187113	2		2.2	5	0.31142	21
	1.9	9	0.185965	3		2.2	5	0.346053	22
	1.9	9	0.189444	4		2.2	5	0.519492	23
	1.6	6	0.217473	3		2.2	5	0.715465	24
	1.9	9	0.223874	5		2.2	5	0.382713	25
	1.9	9	0.202286	6		2.2	6	0.440123	1
	1.9	9	0.3584	7		2.2	6	0.293333	2
	1.9	9	0.183173	8		2.2	6	0.304762	3
	1.9	9	0.170833	9		2.2	6	0.322727	4
	1.9	9	0.173262	10		2	4	0.671507	18
	1.9	9	0.194578	11		2.2	6	0.3416	6
	1.9	9	0.192021	12		2.2	6	0.271986	7
	1.9	9	0.290789	13		2.2	6	0.226667	8
	1.9	9	0.218807	14		2.2	6	0.302313	9
	1.6	6	0.225641	4		2.2	6	0.452754	10
	1.9	9	0.208257	15		2.2	6	0.355273	11
	1.9	9	0.240496	16		2.2	6	0.210403	12
	1.9	9	0.173656	17		2.2	6	0.350679	13
	1.9	9	0.241089	18		2.2	6	0.209239	14
	1.9	9	0.151	19		2.2	6	0.367914	15
	1.9	9	0.247596	20		2.2	6	0.311927	16
	1.9	9	0.254225	21		2.2	6	0.316319	17
	1.9	9	0.167416	22		2.2	6	0.328155	18
	1.9	9	0.202721	23		2.2	6	0.276923	19
	1.9	9	0.270763	24		2.2	6	0.319602	20
	1.6	3	0.25025	3		2.2	6	0.262879	21
	1.6	6	0.377826	5		2.2	6	0.225	22
	1.9	9	0.14221	25		2.2	6	0.500187	23
	2	3	0.23608	1		2.2	6	0.542284	24
	2	3	0.395876	2		2.2	6	0.363241	25
	2	3	0.215033	3		2.2	7	0.363736	1
	2	3	0.351829	4		2.2	7	0.278571	2
	2	3	0.334375	5		2.2	7	0.293388	3
	2	3	0.266159	6		2.2	7	0.309217	4
	2	3	0.414545	7		2.2	7	0.457655	5
	2	3	0.261165	8		2.2	7	0.34009	6
	2	3	0.239011	9		2.2	7	0.253779	7
	1.6	6	0.269333	6		2.2	7	0.206553	8
	2	3	0.418978	10		2.2	7	0.213272	9
	2	3	0.333221	11		2	4	0.395631	21
	2	3	0.266146	12		2.2	7	0.318678	10
	2	3	0.440977	14		2.2	7	0.342657	11
	2	3	0.29	15		2.2	7	0.200704	12
	2	3	0.511579	16		2.2	7	0.352212	13
	2	3	0.345536	17		2.2	7	0.20599	14
	2	3	0.335185	18		2.2	7	0.340598	15
	2	3	0.271552	19		2.2	7	0.305686	16
	1.6	6	0.472941	7		2.2	7	0.27	17
	2	3	0.498239	20		2.2	7	0.318699	18
	2	3	0.536594	21		2.2	7	0.221523	19
	2	3	0.339496	22		2	4	0.528857	22
	2	3	0.50578	23		2.2	7	0.31435	20
	2	3	0.517033	25		2.2	7	0.227928	21
	2	6	0.178543	1		2.2	7	0.212772	22
	2	6	0.204967	2		2.2	7	0.401538	23
	2	6	0.185321	3		2.2	7	0.469505	24
	2	6	0.19877	4		2.2	7	0.346429	25
	1.6	6	0.284337	8		2.2	8	0.305747	1
	2	6	0.311438	5		2.2	8	0.26164	2
	2	6	0.219932	6		2.2	8	0.279012	3
	2	6	0.356504	7		2.2	8	0.29188	4
	2	6	0.238971	8		2.2	8	0.378571	5
	2	6	0.223043	9		2.2	8	0.308276	6
	2	6	0.212692	10		2.2	8	0.240132	7
	2	6	0.277778	11		2.2	8	0.202941	8
	2	6	0.201812	12		2.2	8	0.202913	9
	2	6	0.324779	13		2.2	8	0.311377	10
	2	6	0.264228	14		2.2	8	0.328485	11
	1.6	6	0.276016	9		2.2	8	0.194882	12
	2	6	0.290094	15		2.2	8	0.346465	13
	2	6	0.27356	16		2.2	8	0.195455	14
	2	6	0.241566	17		2.2	8	0.27437	15
	2	6	0.279297	18		2.2	8	0.292647	16
	2	6	0.20473	19		2.2	8	0.216	17
	2	6	0.250278	20		2.2	8	0.306536	18
	2	6	0.277222	21		2.2	8	0.203763	19
	2	6	0.218041	22		2.2	8	0.308654	20
	2	6	0.232479	23		2.2	8	0.191844	21
	2	6	0.420536	24		2.2	8	0.208242	22
	1.6	6	0.25974	10		2.2	8	0.390476	23
	2	6	0.160227	25		2.2	8	0.453101	24
	2	9	0.152778	1		2	4	0.558711	25
	2	9	0.17402	2		2.2	8	0.321598	25
	2	9	0.174265	3		2.2	9	0.263218	1
	2	9	0.181548	4		2.2	9	0.22125	2
	2	9	0.214384	5		2.2	9	0.270166	3
	2	9	0.186818	6		2.2	9	0.245312	4
	2	9	0.334896	7		2.2	9	0.350641	5
	2	9	0.173707	8		2.2	9	0.264423	6
	2	9	0.165108	9		2.2	9	0.226842	7
	1.6	6	0.331988	11		2.2	9	0.183613	8
	2	9	0.167052	10		2.2	9	0.200593	9
	2	9	0.18301	11		2.2	9	0.293	10
	2	9	0.180702	12		2.2	9	0.248864	11
	2	9	0.276087	13		2.2	9	0.1876	12
	2	9	0.209211	14		2.2	9	0.309167	13
	2	9	0.204545	15		2.2	9	0.185156	14
	2	9	0.228276	16		2.2	9	0.225221	15
	2	9	0.166518	17		2.2	9	0.270186	16
	2	9	0.228968	18		2.2	9	0.191827	17
	2	9	0.1488	19		2.2	9	0.2775	18
	1.6	6	0.236916	12		2.2	9	0.173684	19
	2	9	0.234956	20		2	5	0.364671	2
	2	9	0.236022	21		2.2	9	0.285556	20
	2	9	0.157386	22		2.2	9	0.177852	21
	2	9	0.2	23		2.2	9	0.20575	22
	2	9	0.254167	24		2.2	9	0.382759	23
	2	9	0.139847	25		2.2	9	0.402041	24
	2.1	3	0.228758	1		2.2	9	0.30413	25
	2.1	3	0.349057	2		2.3	3	0.3792	2
	2.1	3	0.20848	3		2.3	3	0.421136	3
	2.1	3	0.334158	4		2.3	3	0.596944	4
	1.6	6	0.38375	13		2	5	0.356818	3
	2.1	3	0.318182	5		2.3	3	0.423311	6
	2.1	3	0.258586	6		2.3	3	0.39065	7
	2.1	3	0.388235	7		2.3	3	0.332374	8
	2.1	3	0.2525	8		2.3	3	0.468122	9
	2.1	3	0.230412	9		2.3	3	0.400196	11
	2.1	3	0.409538	10		2.3	3	0.268797	12
	2.1	3	0.321203	11		2.3	3	0.920994	13
	2.1	3	0.257937	12		2.3	3	0.36236	14
	2.1	3	0.421739	14		2	5	0.41753	4
	1.6	6	0.329208	14		2.3	3	0.416871	15
	2.1	3	0.278829	15		2.3	3	0.458434	16
	2.1	3	0.454378	16		2.3	3	0.562826	18
	2.1	3	0.321691	17		2.3	3	0.434667	20
	2.1	3	0.321918	18		2.3	3	0.343023	21
	2.1	3	0.265278	19		2.3	3	0.417797	22
	2.1	3	0.465676	20		2.3	3	0.673109	23
	2.1	3	0.456667	21		2.3	3	0.651879	25
	2.1	3	0.319748	22		2.3	4	0.489687	1
	2.1	3	0.451256	23		2.3	4	0.352252	2
	1.6	3	0.411935	4		2.3	4	0.379211	3
	1.6	6	0.338655	15		2.3	4	0.511832	4
	2.1	3	0.461515	25		2.3	4	0.384615	6
	2.1	6	0.171862	1		2.3	4	0.266418	7
	2.1	6	0.200599	2		2.3	4	0.264931	8
	2.1	6	0.179268	3		2.3	4	0.43871	9
	2.1	6	0.191667	4		2	5	0.405455	6
	2.1	6	0.304167	5		2.3	4	0.661462	10
	2.1	6	0.212579	6		2.3	4	0.380675	11
	2.1	6	0.345205	7		2.3	4	0.235185	12
	2.1	6	0.222368	8		2.3	4	0.444196	13
	2.1	6	0.217083	9		2.3	4	0.284	14
	1.6	6	0.353066	16		2.3	4	0.382847	15
	2.1	6	0.207237	10		2.3	4	0.338851	16
	2.1	6	0.26875	11		2.3	4	0.337879	17
	2.1	6	0.197175	12		2.3	4	0.538308	18
	2.1	6	0.309864	13		2.3	4	0.371	19
	2.1	6	0.254724	14		2	5	0.316193	7
	2.1	6	0.277083	15		2.3	4	0.393493	20
	2.1	6	0.261622	16		2.3	4	0.31526	21
	2.1	6	0.226733	17		2.3	4	0.383533	22
	2.1	6	0.269014	18		2.3	4	0.546454	23
	2.1	6	0.197368	19		2.3	4	0.411776	25
	1.6	6	0.289732	17		2.3	5	0.451301	1
	2.1	6	0.238571	20		2.3	5	0.282168	2
	2.1	6	0.2625	21		2.3	5	0.307282	3
	2.1	6	0.210547	22		2.3	5	0.342763	4
	2.1	6	0.222308	23		2	5	0.265031	8
	2.1	6	0.409794	24		2.3	5	0.625	5
	2.1	6	0.159655	25		2.3	5	0.325	6
	2.1	9	0.149861	1		2.3	5	0.263433	7
	2.1	9	0.166525	2		2.3	5	0.221739	8
	2.1	9	0.168595	3		2.3	5	0.318785	9
	2.1	9	0.17161	4		2.3	5	0.65	10
	1.6	6	0.339147	18		2.3	5	0.369231	11
	2.1	9	0.2084	5		2.3	5	0.207099	12
	2.1	9	0.181604	6		2.3	5	0.343689	13
	2.1	9	0.317021	7		2.3	5	0.217251	14
	2.1	9	0.167939	8		2	5	0.414062	9
	2.1	9	0.159023	9		2.3	5	0.361765	15
	2.1	9	0.162368	10		2.3	5	0.335563	16
	2.1	9	0.175	11		2.3	5	0.327928	17
	2.1	9	0.175	12		2.3	5	0.415942	18
	2.1	9	0.265306	13		2.3	5	0.309111	19
	2.1	9	0.20042	14		2.3	5	0.341111	20
	1.6	6	0.25	19		2.3	5	0.300917	21
	2.1	9	0.197	15		2.3	5	0.316959	22
	2.1	9	0.22053	16		2.3	5	0.481419	23
	2.1	9	0.16	17		2.3	5	0.538736	24
	2.1	9	0.220175	18		2.3	5	0.361983	25
	2.1	9	0.145732	19		2.3	6	0.390741	1
	2.1	9	0.227523	20		2.3	6	0.268987	2
	2.1	9	0.225521	21		2.3	6	0.286331	3
	2.1	9	0.155702	22		2.3	6	0.306335	4
	2.1	9	0.188235	23		2.3	6	0.604066	5
	2.1	9	0.2445	24		2.3	6	0.320205	6
	1.6	6	0.287329	20		2.3	6	0.260191	7
	2.1	9	0.137165	25		2.3	6	0.214179	8
	2.2	3	0.218571	1		2.3	6	0.269876	9
	2.2	3	0.322819	2		2	5	0.433065	11
	2.2	3	0.205882	3		2.3	6	0.42561	10
	2.2	3	0.323462	4		2.3	6	0.336458	11
	2.2	3	0.307801	5		2.3	6	0.204624	12
	2.2	3	0.247826	6		2.3	6	0.31875	13
	2.2	3	0.367257	7		2.3	6	0.205991	14
	2.2	3	0.249315	8		2.3	6	0.351389	15
	2.2	3	0.221825	9		2.3	6	0.301938	16
	1.6	6	0.345783	21		2.3	6	0.302304	17
	2.2	3	0.39837	10		2.3	6	0.313393	18
	2.2	3	0.310174	11		2.3	6	0.262209	19
	2.2	3	0.253	12		2	5	0.236916	12
	2.2	3	0.70943	13		2.3	6	0.305529	20
	2.2	3	0.397368	14		2.3	6	0.251538	21
	2.2	3	0.2692	15		2.3	6	0.217	22
	2.2	3	0.417593	16		2.3	6	0.464516	23
	2.2	3	0.308788	17		2.3	6	0.481316	24
	2.2	3	0.310197	18		2.3	6	0.347034	25
	2.2	3	0.257576	19		2.3	7	0.324516	1
	1.6	6	0.265141	22		2.3	7	0.261719	2
	2.2	3	0.429936	20		2.3	7	0.277673	3
	2.2	3	0.429592	21		2.3	7	0.299038	4
	2.2	3	0.308696	22		2	5	0.447345	13
	2.2	3	0.418644	23		2.3	7	0.43366	5
	2.2	3	0.435227	25		2.3	7	0.314453	6
	2.2	6	0.1675	1		2.3	7	0.239103	7
	2.2	6	0.191053	2		2.3	7	0.199091	8
	2.2	6	0.171852	3		2.3	7	0.204278	9
	2.2	6	0.182843	4		2.3	7	0.307602	10
	1.6	6	0.275281	23		2.3	7	0.324183	11
	2.2	6	0.291398	5		2.3	7	0.185985	12
	2.2	6	0.204819	6		2.3	7	0.318966	13
	2.2	6	0.329885	7		2.3	7	0.201116	14
	2.2	6	0.215455	8		2	5	0.259048	14
	2.2	6	0.209701	9		2.3	7	0.321379	15
	2.2	6	0.204103	10		2.3	7	0.289837	16
	2.2	6	0.256908	11		2.3	7	0.255	17
	2.2	6	0.192398	12		2.3	7	0.308333	18
	2.2	6	0.297802	13		2.3	7	0.213314	19
	2.2	6	0.241579	14		2.3	7	0.296	20
	1.6	6	0.49012	24		2.3	7	0.214599	21
	2.2	6	0.270677	15		2.3	7	0.20544	22
	2.2	6	0.25221	16		2.3	7	0.373734	23
	2.2	6	0.216964	17		2.3	7	0.44026	24
	2.2	6	0.259231	18		2	5	0.496	15
	2.2	6	0.186585	19		2.3	7	0.324269	25
	2.2	6	0.22757	20		2.3	8	0.284836	1
	2.2	6	0.256911	21		2.3	8	0.242982	2
	2.2	6	0.204545	22		2.3	8	0.264356	3
	2.2	6	0.215563	23		2.3	8	0.277481	4
	2.2	6	0.390876	24		2.3	8	0.363913	5
	1.6	3	0.408163	5		2.3	8	0.285776	6
	1.6	6	0.189691	25		2.3	8	0.223077	7
	2.2	6	0.154444	25		2.3	8	0.194545	8
	2.2	9	0.147207	1		2.3	8	0.197561	9
	2.2	9	0.162329	2		2	5	0.383989	16
	2.2	9	0.163462	3		2.3	8	0.301531	10
	2.2	9	0.166055	4		2.3	8	0.309744	11
	2.2	9	0.205806	5		2.3	8	0.184783	12
	2.2	9	0.172083	6		2.3	8	0.316667	13
	2.2	9	0.302193	7		2.3	8	0.185075	14
	2.2	9	0.16374	8		2.3	8	0.262205	15
	2.2	9	0.15411	9		2.3	8	0.284	16
	1.6	9	0.177869	1		2.3	8	0.205822	17
	2.2	9	0.157377	10		2.3	8	0.292778	18
	2.2	9	0.170079	11		2.3	8	0.192035	19
	2.2	9	0.170677	12		2	5	0.4375	17
	2.2	9	0.26	13		2.3	8	0.288189	20
	2.2	9	0.19569	14		2.3	8	0.182143	21
	2.2	9	0.183333	15		2.3	8	0.203687	22
	2.2	9	0.213699	16		2.3	8	0.366667	23
	2.2	9	0.153906	17		2.3	8	0.431847	24
	2.2	9	0.213675	18		2.3	8	0.308225	25
	2.2	9	0.142137	19		2.3	9	0.25175	1
	1.6	9	0.21051	2		2.3	9	0.20814	2
	2.2	9	0.219858	20		2.3	9	0.257547	3
	2.2	9	0.215984	21		2.3	9	0.229924	4
	2.2	9	0.153333	22		2	5	0.589011	18
	2.2	9	0.183333	23		2.3	9	0.33156	5
	2.2	9	0.233456	24		2.3	9	0.251634	6
	2.2	9	0.136515	25		2.3	9	0.218182	7
	2.3	3	0.213636	1		2.3	9	0.17439	8
	2.3	3	0.307042	2		2.3	9	0.183019	9
	2.3	3	0.20367	3		2.3	9	0.270161	10
	2.3	3	0.313821	4		2.3	9	0.233772	11
	1.6	9	0.210317	3		2.3	9	0.180734	12
	2.3	3	0.3	5		2.3	9	0.292262	13
	2.3	3	0.236885	6		2.3	9	0.180328	14
	2.3	3	0.352066	7		2	5	0.448101	19
	2.3	3	0.234444	8		2.3	9	0.214113	15
	2.3	3	0.213258	9		2.3	9	0.25994	16
	2.3	3	0.373256	10		2.3	9	0.182857	17
	2.3	3	0.298544	11		2.3	9	0.258678	18
	2.3	3	0.242262	12		2.3	9	0.165132	19
	2.3	3	0.614625	13		2.3	9	0.271382	20
	2.3	3	0.385586	14		2.3	9	0.167702	21
	1.6	9	0.21391	4		2.3	9	0.1965	22
	2.3	3	0.263704	15		2.3	9	0.362575	23
	2.3	3	0.389313	16		2.3	9	0.385492	24
	2.3	3	0.292339	17		2	3	0.486364	7
	2.3	3	0.29717	18		2	5	0.654971	20
	2.3	3	0.240854	19		2.3	9	0.289252	25
	2.3	3	0.392149	20		2.4	3	0.354469	2
	2.3	3	0.404514	21		2.4	3	0.393103	3
	2.3	3	0.29875	22		2.4	3	0.568266	4
	2.3	3	0.389189	23		2.4	3	0.402895	6
	1.6	9	0.254135	5		2.4	3	0.372789	7
	2.3	3	0.414024	25		2.4	3	0.317598	8
	2.3	6	0.162446	1		2.4	3	0.444615	9
	2.3	6	0.182353	2		2	5	0.355102	21
	2.3	6	0.167518	3		2.4	3	0.379221	11
	2.3	6	0.173894	4		2.4	3	0.259247	12
	2.3	6	0.283158	5		2.4	3	0.612617	13
	2.3	6	0.200852	6		2.4	3	0.345146	14
	2.3	6	0.31422	7		2.4	3	0.378671	15
	2.3	6	0.204762	8		2.4	3	0.406281	16
	2.3	6	0.205195	9		2.4	3	0.528065	17
	1.6	9	0.232061	6		2.4	3	0.502321	18
	2.3	6	0.19593	10		2.4	3	0.422115	19
	2.3	6	0.25	11		2	5	0.423724	22
	2.3	6	0.190278	12		2.4	3	0.408597	20
	2.3	6	0.279918	13		2.4	3	0.318293	21
	2.3	6	0.235437	14		2.4	3	0.373858	22
	2.3	6	0.261871	15		2.4	3	0.609328	23
	2.3	6	0.248246	16		2.4	3	0.618723	25
	2.3	6	0.210741	17		2.4	4	0.454915	1
	2.3	6	0.254573	18		2.4	4	0.314545	2
	2.3	6	0.18	19		2.4	4	0.359779	3
	1.6	9	0.410248	7		2.4	4	0.489607	4
	2.3	6	0.221154	20		2	5	0.644545	23
	2.3	6	0.23869	21		2.4	4	0.362264	6
	2.3	6	0.200347	22		2.4	4	0.258282	7
	2.3	6	0.209877	23		2.4	4	0.256684	8
	2.3	6	0.374	24		2.4	4	0.403516	9
	2.3	6	0.149856	25		2.4	4	0.609446	10
	2.3	9	0.145	1		2.4	4	0.364384	11
	2.3	9	0.158741	2		2.4	4	0.223874	12
	2.3	9	0.161589	3		2.4	4	0.4125	13
	2.3	9	0.163235	4		2.4	4	0.264961	14
	1.6	9	0.211806	8		2.4	4	0.359545	15
	2.3	9	0.200862	5		2.4	4	0.326647	16
	2.3	9	0.165909	6		2.4	4	0.316296	17
	2.3	9	0.292623	7		2.4	4	0.454208	18
	2.3	9	0.158712	8		2.4	4	0.327273	19
	2.3	9	0.151582	9		2.4	4	0.367988	20
	2.3	9	0.151302	10		2.4	4	0.302809	21
	2.3	9	0.165672	11		2.4	4	0.358072	22
	2.3	9	0.163445	12		2.4	4	0.488652	23
	2.3	9	0.251042	13		2	5	0.442353	25
	2.3	9	0.183654	14		2.4	4	0.388304	25
	1.6	9	0.196364	9		2.4	5	0.407399	1
	2.3	9	0.178125	15		2.4	5	0.261561	2
	2.3	9	0.208075	16		2.4	5	0.300382	3
	2.3	9	0.15	17		2.4	5	0.325926	4
	2.3	9	0.206207	18		2.4	5	0.590426	5
	2.3	9	0.140043	19		2.4	5	0.303548	6
	2.3	9	0.212759	20		2.4	5	0.255422	7
	2.3	9	0.208475	21		2.4	5	0.211852	8
	2.3	9	0.150746	22		2.4	5	0.298958	9
	2.3	9	0.172566	23		2	6	0.576569	1
	2.3	9	0.224812	24		2.4	5	0.597076	10
	1.6	3	0.32017	6		2.4	5	0.356548	11
	1.6	9	0.198919	10		2.4	5	0.202835	12
	2.3	9	0.135068	25		2.4	5	0.315086	13
	2.4	3	0.20596	1		2.4	5	0.209593	14
	2.4	3	0.290291	2		2.4	5	0.350973	15
	2.4	3	0.194785	3		2.4	5	0.323476	16
	2.4	3	0.305674	4		2.4	5	0.311935	17
	2.4	3	0.282468	5		2.4	5	0.395536	18
	2.4	3	0.226812	6		2.4	5	0.284375	19
	2.4	3	0.330172	7		2	6	0.3525	2
	2.4	3	0.226882	8		2.4	5	0.318207	20
	2.4	3	0.205906	9		2.4	5	0.278333	21
	1.6	9	0.221382	11		2.4	5	0.306198	22
	2.4	3	0.359524	10		2.4	5	0.453265	23
	2.4	3	0.288168	11		2.4	5	0.472811	24
	2.4	3	0.230921	12		2.4	5	0.347674	25
	2.4	3	0.549655	13		2.4	6	0.3506	1
	2.4	3	0.363667	14		2.4	6	0.257857	2
	2.4	3	0.255245	15		2.4	6	0.275161	3
	2.4	3	0.371519	16		2.4	6	0.295909	4
	2.4	3	0.282231	17		2	6	0.342053	3
	2.4	3	0.285965	18		2.4	6	0.565714	5
	2.4	3	0.232609	19		2.4	6	0.297248	6
	1.6	9	0.21748	12		2.4	6	0.250281	7
	2.4	3	0.366142	20		2.4	6	0.208919	8
	2.4	3	0.387931	21		2.4	6	0.257576	9
	2.4	3	0.281863	22		2.4	6	0.406388	10
	2.4	3	0.372	23		2.4	6	0.322642	11
	2.4	3	0.394091	25		2.4	6	0.197015	12
	2.4	6	0.156682	1		2.4	6	0.303757	13
	2.4	6	0.176111	2		2.4	6	0.197443	14
	2.4	6	0.164437	3		2	6	0.356278	4
	2.4	6	0.167982	4		2.4	6	0.33156	15
	1.6	9	0.339815	13		2.4	6	0.286364	16
	2.4	6	0.270082	5		2.4	6	0.277459	17
	2.4	6	0.192105	6		2.4	6	0.299474	18
	2.4	6	0.294944	7		2.4	6	0.252715	19
	2.4	6	0.2024	8		2.4	6	0.29009	20
	2.4	6	0.194521	9		2.4	6	0.231959	21
	2.4	6	0.190584	10		2.4	6	0.20984	22
	2.4	6	0.236517	11		2.4	6	0.431034	23
	2.4	6	0.180921	12		2.4	6	0.450226	24
	2.4	6	0.27125	13		2	3	0.437	8
	2.4	6	0.223246	14		2.4	6	0.327019	25
	1.6	9	0.253793	14		2.4	7	0.300513	1
	2.4	6	0.253659	15		2.4	7	0.250682	2
	2.4	6	0.235496	16		2.4	7	0.265714	3
	2.4	6	0.203521	17		2.4	7	0.282377	4
	2.4	6	0.242614	18		2.4	7	0.414461	5
	2.4	6	0.170792	19		2.4	7	0.29697	6
	2.4	6	0.213946	20		2.4	7	0.222059	7
	2.4	6	0.225862	21		2.4	7	0.191919	8
	2.4	6	0.185246	22		2.4	7	0.195283	9
	2.4	6	0.206349	23		2	6	0.401966	6
	2.4	6	0.365031	24		2.4	7	0.3	10
	1.6	9	0.250289	15		2.4	7	0.308974	11
	2.4	6	0.149392	25		2.4	7	0.180081	12
	2.4	9	0.143769	1		2.4	7	0.307179	13
	2.4	9	0.154362	2		2.4	7	0.190179	14
	2.4	9	0.159357	3		2.4	7	0.310947	15
	2.4	9	0.158389	4		2.4	7	0.279	16
	2.4	9	0.192105	5		2.4	7	0.247297	17
	2.4	9	0.163576	6		2.4	7	0.292771	18
	2.4	9	0.272059	7		2.4	7	0.205738	19
	2.4	9	0.156402	8		2	6	0.309524	7
	2.4	9	0.150847	9		2.4	7	0.276667	20
	1.6	9	0.280795	16		2.4	7	0.205455	21
	2.4	9	0.150777	10		2.4	7	0.201883	22
	2.4	9	0.160949	11		2.4	7	0.351479	23
	2.4	9	0.160317	12		2.4	7	0.425132	24
	2.4	9	0.246111	13		2.4	7	0.311826	25
	2.4	9	0.180952	14		2.4	8	0.270588	1
	2.4	9	0.171324	15		2.4	8	0.227239	2
	2.4	9	0.20216	16		2.4	8	0.254338	3
	2.4	9	0.147273	17		2.4	8	0.264848	4
	2.4	9	0.198333	18		2	6	0.255208	8
	2.4	9	0.137061	19		2.4	8	0.344904	5
	1.6	9	0.205702	17		2.4	8	0.271753	6
	2.4	9	0.208232	20		2.4	8	0.215217	7
	2.4	9	0.20082	21		2.4	8	0.187143	8
	2.4	9	0.143617	22		2.4	8	0.182692	9
	2.4	9	0.169444	23		2.4	8	0.287383	10
	2.4	9	0.221756	24		2.4	8	0.295339	11
	2.4	9	0.13125	25		2.4	8	0.178689	12
	2.5	3	0.20355	1		2.4	8	0.304121	13
	2.5	3	0.279798	2		2.4	8	0.179496	14
	2.5	3	0.192157	3		2	6	0.385855	9
	2.5	3	0.296569	4		2.4	8	0.257095	15
	1.6	9	0.270714	18		2.4	8	0.271724	16
	2.5	3	0.26875	5		2.4	8	0.194196	17
	2.5	3	0.220333	6		2.4	8	0.272778	18
	2.5	3	0.314674	7		2.4	8	0.182937	19
	2.5	3	0.220588	8		2.4	8	0.271296	20
	2.5	3	0.204012	9		2.4	8	0.178049	21
	2.5	3	0.353631	10		2.4	8	0.194022	22
	2.5	3	0.284375	11		2.4	8	0.344958	23
	2.5	3	0.225258	12		2.4	8	0.417857	24
	2.5	3	0.502358	13		2	6	0.532195	10
	2.5	3	0.340476	14		2.4	8	0.298624	25
	1.6	9	0.169712	19		2.4	9	0.234951	1
	2.5	3	0.249194	15		2.4	9	0.19899	2
	2.5	3	0.356667	16		2.4	9	0.251383	3
	2.5	3	0.271769	17		2.4	9	0.219512	4
	2.5	3	0.277477	18		2.4	9	0.315758	5
	2.5	3	0.225521	19		2.4	9	0.235165	6
	2.5	3	0.353865	20		2.4	9	0.209191	7
	2.5	3	0.366518	21		2.4	9	0.167483	8
	2.5	3	0.275	22		2.4	9	0.1735	9
	2.5	3	0.354508	23		2	6	0.400487	11
	2.5	3	0.788366	24		2.4	9	0.260853	10
	1.6	3	0.58038	7		2.4	9	0.221121	11
	1.6	9	0.280597	20		2.4	9	0.174206	12
	2.5	3	0.371691	25		2.4	9	0.274138	13
	2.5	6	0.151382	1		2.4	9	0.172436	14
	2.5	6	0.170103	2		2.4	9	0.212202	15
	2.5	6	0.16	3		2.4	9	0.250829	16
	2.5	6	0.163525	4		2.4	9	0.173529	17
	2.5	6	0.262214	5		2.4	9	0.248058	18
	2.5	6	0.185366	6		2.4	9	0.161465	19
	2.5	6	0.290323	7		2	6	0.229439	12
	2.5	6	0.191875	8		2.4	9	0.25977	20
	2.5	6	0.184694	9		2.4	9	0.161709	21
	1.6	9	0.3	21		2.4	9	0.195402	22
	2.5	6	0.183758	10		2.4	9	0.337692	23
	2.5	6	0.228804	11		2.4	9	0.367805	24
	2.5	6	0.177372	12		2.4	9	0.277273	25
	2.5	6	0.261053	13		2	6	0.404225	13
	2.5	6	0.216949	14		2	6	0.23125	14
	2.5	6	0.249333	15		2	3	0.583816	9
	2.5	6	0.229435	16		2	6	0.448276	15
	2.5	6	0.199375	17		2	6	0.34876	16
	2.5	6	0.234302	18		2	6	0.368478	17
	2.5	6	0.167797	19		2	6	0.398529	18
	1.6	9	0.197761	22		2	6	0.328378	19
	2.5	6	0.210256	20		2	6	0.365691	20
	2.5	6	0.220093	21		2	6	0.302394	21
	2.5	6	0.17967	22		2	6	0.247107	22
	2.5	6	0.195876	23		2	6	0.613843	23
	2.5	6	0.354717	24		2.5	3	0.57459	1
	2.5	6	0.148734	25		2.5	6	0.310106	25
	2.5	9	0.141512	1		2.5	7	0.280841	1
	2.5	9	0.149216	2		2.5	7	0.228862	2
	2.5	9	0.15565	3		2.5	7	0.254976	3
	2.5	9	0.151471	4		2.5	7	0.273381	4
	1.6	9	0.231776	23		2.5	7	0.397426	5
	2.5	9	0.181667	5		2.5	7	0.275	6
	2.5	9	0.158844	6		2.5	7	0.210976	7
	2.5	9	0.264865	7		2.5	7	0.181855	8
	2.5	9	0.151899	8		2.5	7	0.186792	9
	2.5	9	0.147458	9		2.5	3	0.364286	11
	2.5	9	0.147727	10		2.5	7	0.282589	10
	2.5	9	0.156463	11		2.5	7	0.290244	11
	2.5	9	0.159701	12		2.5	7	0.170455	12
	2.5	9	0.236979	13		2.5	7	0.295213	13
	2.5	9	0.168452	14		2.5	7	0.183987	14
	1.6	9	0.304545	24		2.5	7	0.297895	15
	2.5	9	0.165132	15		2.5	7	0.265132	16
	2.5	9	0.200806	16		2.5	7	0.230729	17
	2.5	9	0.146094	17		2.5	7	0.272165	18
	2.5	9	0.193293	18		2.5	7	0.19902	19
	2.5	9	0.134038	19		2.5	3	0.247771	12
	2.5	9	0.200338	20		2.5	7	0.265506	20
	2.5	9	0.194118	21		2.5	7	0.19685	21
	2.5	9	0.141899	22		2.5	7	0.187745	22
	2.5	9	0.161702	23		2.5	7	0.333206	23
	2.5	9	0.212	24		2.5	7	0.414541	24
	1.6	9	0.151034	25		2.5	7	0.300781	25
	2.5	9	0.127848	25		2.5	8	0.257225	1
	2.6	3	0.198033	1		2.5	8	0.216452	2
	2.6	3	0.2692	2		2.5	8	0.241905	3
	2.6	3	0.186691	3		2.5	8	0.25791	4
	2.6	3	0.287629	4		2.5	3	0.556481	13
	2.6	3	0.261818	5		2.5	8	0.330822	5
	2.6	3	0.211806	6		2.5	8	0.25748	6
	2.6	3	0.30102	7		2.5	8	0.203488	7
	2.6	3	0.212019	8		2.5	8	0.175	8
	2.6	3	0.202071	9		2.5	8	0.174742	9
	1.7	3	0.25748	1		2.5	8	0.27605	10
	2.6	3	0.341379	10		2.5	8	0.278571	11
	2.6	3	0.2675	11		2.5	8	0.170588	12
	2.6	3	0.214286	12		2.5	8	0.297436	13
	2.6	3	0.476582	13		2.5	8	0.173973	14
	2.6	3	0.326522	14		2.5	3	0.322701	14
	2.6	3	0.238667	15		2.5	8	0.240341	15
	2.6	3	0.335271	16		2.5	8	0.260256	16
	2.6	3	0.260197	17		2.5	8	0.187	17
	2.6	3	0.270438	18		2.5	8	0.258678	18
	2.6	3	0.218636	19		2.5	8	0.178261	19
	1.7	3	0.478125	2		2.5	8	0.258721	20
	2.6	3	0.334052	20		2.5	8	0.169408	21
	2.6	3	0.356746	21		2.5	8	0.185294	22
	2.6	3	0.263426	22		2.5	8	0.323973	23
	2.6	3	0.339175	23		2.5	8	0.392414	24
	2.6	3	0.673953	24		2.5	3	0.360238	15
	2.6	3	0.35848	25		2.5	8	0.281716	25
	2.6	6	0.149893	1		2.5	9	0.218939	1
	2.6	6	0.162736	2		2.5	9	0.185039	2
	2.6	6	0.156667	3		2.5	9	0.234821	3
	2.6	6	0.159583	4		2.5	9	0.211268	4
	1.7	3	0.237281	3		2.5	9	0.306992	5
	2.6	6	0.256173	5		2.5	9	0.222727	6
	2.6	6	0.176894	6		2.5	9	0.205732	7
	2.6	6	0.271154	7		2.5	9	0.160588	8
	2.6	6	0.186905	8		2.5	9	0.167883	9
	2.6	6	0.180667	9		2.5	3	0.376408	16
	2.6	6	0.175725	10		2.5	9	0.251563	10
	2.6	6	0.219271	11		2.5	9	0.215074	11
	2.6	6	0.171831	12		2.5	9	0.166923	12
	2.6	6	0.260236	13		2.5	9	0.263214	13
	2.6	6	0.2125	14		2.5	9	0.166883	14
	1.7	3	0.401323	4		2.5	9	0.201974	15
	2.6	6	0.243684	15		2.5	9	0.250667	16
	2.6	6	0.223986	16		2.5	9	0.165873	17
	2.6	6	0.19697	17		2.5	9	0.236842	18
	2.6	6	0.226087	18		2.5	9	0.157027	19
	2.6	6	0.161386	19		2.5	3	0.490152	17
	2.6	6	0.201603	20		2.5	9	0.252123	20
	2.6	6	0.21748	21		2.5	9	0.157838	21
	2.6	6	0.174432	22		2.5	9	0.182857	22
	2.6	6	0.193617	23		2.5	9	0.316892	23
	2.6	6	0.334677	24		2.5	9	0.355921	24
	1.6	3	0.315845	8		2.5	9	0.265411	25
	1.7	3	0.386957	5		2.7	3	0.470122	1
	2.6	6	0.147533	25		2.7	3	0.305707	2
	2.6	9	0.138735	1		2.7	3	0.335443	3
	2.6	9	0.149782	2		2.7	3	0.504878	4
	2.6	9	0.15163	3		2.5	3	0.443462	18
	2.6	9	0.15	4		2.7	3	0.63014	5
	2.6	9	0.176923	5		2.7	3	0.332624	6
	2.6	9	0.155279	6		2.7	3	0.32449	7
	2.6	9	0.253049	7		2.7	3	0.276106	8
	2.6	9	0.148372	8		2.7	3	0.342609	9
	2.6	9	0.144612	9		2.7	3	0.584195	10
	1.7	3	0.306776	6		2.7	3	0.346277	11
	2.6	9	0.147452	10		2.7	3	0.22439	12
	2.6	9	0.153459	11		2.7	3	0.505357	13
	2.6	9	0.156863	12		2.7	3	0.292	14
	2.6	9	0.232906	13		2.5	3	0.359031	19
	2.6	9	0.168095	14		2.7	3	0.320395	15
	2.6	9	0.157143	15		2.7	3	0.351802	16
	2.6	9	0.187791	16		2.7	3	0.4175	17
	2.6	9	0.143699	17		2.7	3	0.390726	18
	2.6	9	0.188462	18		2.7	3	0.304803	19
	2.6	9	0.13134	19		2.7	3	0.349174	20
	1.7	3	0.548077	7		2.7	3	0.277523	21
	2.6	9	0.192929	20		2.7	3	0.307108	22
	2.6	9	0.179	21		2.7	3	0.474855	23
	2.6	9	0.140643	22		2.7	3	0.782489	24
	2.6	9	0.155882	23		2.5	3	0.332627	2
	2.6	9	0.209864	24		2.5	3	0.379856	20
	2.6	9	0.126136	25		2.7	3	0.478611	25
	1.7	3	0.300442	8		2.7	4	0.37037	1
	1.7	3	0.277273	9		2.7	4	0.262874	2
	1.7	3	0.469925	10		2.7	4	0.316667	3
	1.7	3	0.380195	11		2.7	4	0.415816	4
	1.7	3	0.309924	12		2.7	4	0.586682	5
	1.7	3	0.528402	14		2.7	4	0.301705	6
	1.6	3	0.295977	9		2.7	4	0.222816	7
	1.7	3	0.321667	15		2.7	4	0.222426	8
	1.7	3	0.46626	17		2.7	4	0.300388	9
	1.7	3	0.387295	18		2.5	3	0.304196	21
	1.7	3	0.315	19		2.7	4	0.487209	10
	1.7	3	0.697605	21		2.7	4	0.318557	11
	1.7	3	0.416667	22		2.7	4	0.203533	12
	1.7	3	0.854752	23		2.7	4	0.358376	13
	2.7	3	0.198269	1		2.7	4	0.229615	14
	2.7	3	0.332143	10		2.7	4	0.31117	15
	2.8	3	0.332796	25		2.7	4	0.300398	16
	2.8	6	0.146104	1		2.7	4	0.275521	17
	2.8	6	0.158065	2		2.7	4	0.377899	18
	2.8	6	0.150284	3		2.7	4	0.256593	19
	2.8	6	0.152899	4		2.5	3	0.34918	22
	2.8	6	0.244805	5		2.7	4	0.318836	20
	2.8	6	0.168841	6		2.7	4	0.26227	21
	2.8	6	0.246386	7		2.7	4	0.301382	22
	2.8	6	0.173563	8		2.7	4	0.403957	23
	2.8	6	0.169192	9		2.7	4	0.899262	24
	2.7	3	0.26358	11		2.7	4	0.335849	25
	2.8	6	0.164634	10		2.7	5	0.317614	1
	2.8	6	0.207075	11		2.7	5	0.221481	2
	2.8	6	0.164388	12		2.7	5	0.265313	3
	2.8	6	0.249367	13		2.7	5	0.287218	4
	2.8	6	0.203704	14		2.5	3	0.55014	23
	2.8	6	0.225728	15		2.7	5	0.515353	5
	2.8	6	0.213272	16		2.7	5	0.259459	6
	2.8	6	0.174432	17		2.7	5	0.218269	7
	2.8	6	0.212705	18		2.7	5	0.193694	8
	2.8	6	0.156855	19		2.7	5	0.250263	9
	2.7	3	0.213158	12		2.7	5	0.480328	10
	2.8	6	0.194286	20		2.7	5	0.309112	11
	2.8	6	0.202273	21		2.7	5	0.180556	12
	2.8	6	0.162234	22		2.7	5	0.275625	13
	2.8	6	0.182632	23		2.7	5	0.191099	14
	2.8	6	0.307364	24		2.7	5	0.304121	15
	2.8	6	0.144138	25		2.7	5	0.297449	16
	2.8	9	0.135959	1		2.7	5	0.266667	17
	2.8	9	0.14375	2		2.7	5	0.341949	18
	2.8	9	0.148958	3		2.7	5	0.249405	19
	2.8	9	0.147511	4		2.7	5	0.271935	20
	2.7	3	0.454237	13		2.7	5	0.235789	21
	2.8	9	0.165	5		2.7	5	0.259538	22
	2.8	9	0.148908	6		2.7	5	0.387288	23
	2.8	9	0.240667	7		2.7	5	0.406928	24
	2.8	9	0.146216	8		2.5	3	0.544898	25
	2.8	9	0.142365	9		2.7	5	0.302245	25
	2.8	9	0.141406	10		2.7	6	0.282203	1
	2.8	9	0.142453	11		2.7	6	0.214516	2
	2.8	9	0.153293	12		2.7	6	0.244578	3
	2.8	9	0.218584	13		2.7	6	0.260645	4
	2.8	9	0.159434	14		2.7	6	0.503512	5
	2.7	3	0.316116	14		2.7	6	0.25471	6
	2.8	9	0.148869	15		2.7	6	0.213333	7
	2.8	9	0.17663	16		2.7	6	0.187727	8
	2.8	9	0.138511	17		2.7	6	0.215789	9
	2.8	9	0.173636	18		2.5	4	0.417598	1
	2.8	9	0.125694	19		2.7	6	0.355689	10
	2.8	9	0.187821	20		2.7	6	0.277099	11
	2.8	9	0.170833	21		2.7	6	0.176953	12
	2.8	9	0.13522	22		2.7	6	0.268217	13
	2.8	9	0.155906	23		2.7	6	0.177597	14
	2.8	9	0.201678	24		2.7	6	0.300858	15
	2.7	3	0.231757	15		2.7	6	0.259893	16
	2.8	9	0.121528	25		2.7	6	0.236842	17
	2.9	3	0.191441	1		2.7	6	0.255705	18
	2.9	3	0.250633	2		2.7	6	0.220068	19
	2.9	3	0.170866	3		2.5	4	0.303427	2
	2.9	3	0.264437	4		2.7	6	0.251823	20
	2.9	3	0.245	5		2.7	6	0.20292	21
	2.9	3	0.201263	6		2.7	6	0.190526	22
	2.9	3	0.271053	7		2.7	6	0.372426	23
	2.9	3	0.200373	8		2.7	6	0.396617	24
	2.9	3	0.1835	9		2.7	6	0.287727	25
	2.7	3	0.321935	16		2.7	7	0.247647	1
	2.9	3	0.31453	10		2.7	7	0.206395	2
	2.9	3	0.25	11		2.7	7	0.23211	3
	2.9	3	0.201838	12		2.7	7	0.256684	4
	2.9	3	0.409286	13		2.5	4	0.344366	3
	2.9	3	0.294505	14		2.7	7	0.370109	5
	2.9	3	0.219375	15		2.7	7	0.257714	6
	2.9	3	0.301515	16		2.7	7	0.196667	7
	2.9	3	0.239	17		2.7	7	0.168212	8
	2.9	3	0.25137	18		2.7	7	0.168605	9
	2.9	3	0.205814	19		2.7	7	0.265504	10
	2.7	3	0.255814	17		2.7	7	0.264465	11
	2.9	3	0.307967	20		2.7	7	0.161765	12
	2.9	3	0.317021	21		2.7	7	0.271374	13
	2.9	3	0.235811	22		2.7	7	0.172581	14
	2.9	3	0.304297	23		2.5	4	0.466527	4
	2.9	3	0.497059	24		2.7	7	0.270982	15
	2.9	3	0.314904	25		2.7	7	0.254587	16
	2.9	6	0.145558	1		2.7	7	0.205785	17
	2.9	6	0.153309	2		2.7	7	0.253822	18
	2.9	6	0.148469	3		2.7	7	0.183168	19
	2.9	6	0.15073	4		2.7	7	0.250211	20
	2.7	3	0.262214	18		2.7	7	0.182031	21
	2.9	6	0.231959	5		2.7	7	0.174576	22
	2.9	6	0.164483	6		2.7	7	0.30221	23
	2.9	6	0.246795	7		2.7	7	0.384559	24
	2.9	6	0.168354	8		2.5	3	0.364655	3
	2.9	6	0.160638	9		2.5	4	0.881875	5
	2.9	6	0.159655	10		2.7	7	0.277365	25
	2.9	6	0.196875	11		2.7	8	0.23172	1
	2.9	6	0.16	12		2.7	8	0.196262	2
	2.9	6	0.237143	13		2.7	8	0.221212	3
	2.9	6	0.193151	14		2.7	8	0.233913	4
	2.7	3	0.215094	19		2.7	8	0.308192	5
	2.9	6	0.218981	15		2.7	8	0.236979	6
	2.9	6	0.207692	16		2.7	8	0.188971	7
	2.9	6	0.16875	17		2.7	8	0.164826	8
	2.9	6	0.205755	18		2.7	8	0.163141	9
	2.9	6	0.154264	19		2.5	4	0.333784	6
	2.9	6	0.189759	20		2.7	8	0.257955	10
	2.9	6	0.194167	21		2.7	8	0.25838	11
	2.9	6	0.157865	22		2.7	8	0.160191	12
	2.9	6	0.178037	23		2.7	8	0.267293	13
	2.9	6	0.301014	24		2.7	8	0.162571	14
	2.7	3	0.260909	2		2.7	8	0.225688	15
	2.7	3	0.319444	20		2.7	8	0.247475	16
	2.9	6	0.141809	25		2.7	8	0.170093	17
	2.9	9	0.134698	1		2.7	8	0.239412	18
	2.9	9	0.14325	2		2.7	8	0.163636	19
	2.9	9	0.146154	3		2.5	4	0.250524	7
	2.9	9	0.143506	4		2.7	8	0.23381	20
	2.9	9	0.161364	5		2.7	8	0.158133	21
	2.9	9	0.147005	6		2.7	8	0.173214	22
	2.9	9	0.236029	7		2.7	8	0.292778	23
	2.9	9	0.143716	8		2.7	8	0.366667	24
	2.9	9	0.1395	9		2.7	8	0.264	25
	2.7	3	0.341477	21		2.7	9	0.205615	1
	2.9	9	0.140436	10		2.7	9	0.170588	2
	2.9	9	0.142029	11		2.7	9	0.213636	3
	2.9	9	0.149235	12		2.7	9	0.20026	4
	2.9	9	0.216387	13		2.5	4	0.244681	8
	2.9	9	0.154091	14		2.7	9	0.284188	5
	2.9	9	0.148284	15		2.7	9	0.204762	6
	2.9	9	0.172477	16		2.7	9	0.185256	7
	2.9	9	0.136364	17		2.7	9	0.15266	8
	2.9	9	0.168571	18		2.7	9	0.156522	9
	2.9	9	0.123821	19		2.7	9	0.233133	10
	2.7	3	0.256015	22		2.7	9	0.201543	11
	2.9	9	0.176842	20		2.7	9	0.156863	12
	2.9	9	0.165882	21		2.7	9	0.250488	13
	2.9	9	0.132595	22		2.7	9	0.158989	14
	2.9	9	0.153311	23		2.5	4	0.34958	9
	2.9	9	0.203468	24		2.7	9	0.190385	15
	2.9	9	0.118341	25		2.7	9	0.223551	16
	3	3	0.187162	1		2.7	9	0.156209	17
	3	3	0.24359	2		2.7	9	0.217857	18
	3	3	0.166327	3		2.7	9	0.148084	19
	3	3	0.261278	4		2.7	9	0.223387	20
	2.7	3	0.325926	23		2.7	9	0.149336	21
	3	3	0.233908	5		2.7	9	0.169922	22
	3	3	0.196269	6		2.7	9	0.288211	23
	3	3	0.258451	7		2.7	9	0.331845	24
	3	3	0.195263	8		2.5	4	0.555802	10
	3	3	0.176364	9		2.7	9	0.250802	25
	3	3	0.31162	10		2.9	3	0.408434	1
	3	3	0.24086	11		2.9	3	0.278061	2
	3	3	0.197514	12		2.9	3	0.312903	3
	3	3	0.4	13		2.9	3	0.476301	4
	3	3	0.284848	14		2.9	3	0.555458	5
	2.7	3	0.607714	24		2.9	3	0.302459	6
	3	3	0.216518	15		2.9	3	0.300254	7
	3	3	0.295755	16		2.9	3	0.257911	8
	3	3	0.230081	17		2.9	3	0.290404	9
	3	3	0.242593	18		2.5	4	0.352033	11
	3	3	0.200781	19		2.9	3	0.520872	10
	3	3	0.29382	20		2.9	3	0.312694	11
	3	3	0.308392	21		2.9	3	0.209091	12
	3	3	0.230723	22		2.9	3	0.45131	13
	3	3	0.292568	23		2.9	3	0.263253	14
	3	3	0.464	24		2.9	3	0.30197	15
	2.7	3	0.348684	25		2.9	3	0.32651	16
	3	3	0.311111	25		2.9	3	0.375564	17
	3	6	0.144084	1		2.9	3	0.36	18
	3	6	0.15219	2		2.9	3	0.269048	19
	3	6	0.149621	3		2.5	4	0.212891	12
	3	6	0.149186	4		2.9	3	0.321714	20
	3	6	0.232184	5		2.9	3	0.261268	21
	3	6	0.158696	6		2.9	3	0.278972	22
	3	6	0.237324	7		2.9	3	0.431752	23
	3	6	0.166489	8		2.9	3	0.607321	24
	3	6	0.158491	9		2.9	3	0.432692	25
	2.7	6	0.147564	1		2.9	4	0.3325	1
	3	6	0.159177	10		2.9	4	0.243452	2
	3	6	0.200362	11		2.9	4	0.29958	3
	3	6	0.157647	12		2.9	4	0.394595	4
	3	6	0.235897	13		2.5	4	0.398947	13
	3	6	0.190769	14		2.9	4	0.522195	5
	3	6	0.216216	15		2.9	4	0.268321	6
	3	6	0.203774	16		2.9	4	0.207836	7
	3	6	0.166477	17		2.9	4	0.208163	8
	3	6	0.202431	18		2.9	4	0.261677	9
	3	6	0.14978	19		2.9	4	0.455254	10
	2.7	6	0.159244	2		2.9	4	0.300664	11
	3	6	0.181053	20		2.9	4	0.190811	12
	3	6	0.188889	21		2.9	4	0.325424	13
	3	6	0.158019	22		2.9	4	0.214145	14
	3	6	0.168878	23		2.5	4	0.256024	14
	3	6	0.291327	24		2.9	4	0.285204	15
	3	6	0.141007	25		2.9	4	0.278571	16
	3	9	0.132014	1		2.9	4	0.255	17
	3	9	0.144068	2		2.9	4	0.354321	18
	3	9	0.145187	3		2.9	4	0.234286	19
	3	9	0.142166	4		2.9	4	0.29734	20
	2.7	6	0.15506	3		2.9	4	0.234659	21
	3	9	0.163636	5		2.9	4	0.274837	22
	3	9	0.143527	6		2.9	4	0.375676	23
	3	9	0.226087	7		2.9	4	0.565748	24
	3	9	0.140556	8		2.5	3	0.553021	4
	3	9	0.1365	9		2.5	4	0.336864	15
	3	9	0.139539	10		2.9	4	0.311384	25
	3	9	0.141154	11		2.9	5	0.279032	1
	3	9	0.146649	12		2.9	5	0.201136	2
	3	9	0.212174	13		2.9	5	0.251914	3
	3	9	0.149719	14		2.9	5	0.268012	4
	2.7	6	0.156767	4		2.9	5	0.486842	5
	3	9	0.147396	15		2.9	5	0.2395	6
	3	9	0.167619	16		2.9	5	0.205435	7
	3	9	0.133409	17		2.9	5	0.177338	8
	3	9	0.164	18		2.9	5	0.223182	9
	3	9	0.120833	19		2.5	4	0.314481	16
	3	9	0.171825	20		2.9	5	0.449107	10
	3	9	0.157051	21		2.9	5	0.282661	11
	3	9	0.129808	22		2.9	5	0.168345	12
	3	9	0.149339	23		2.9	5	0.256597	13
	3	9	0.199324	24		2.9	5	0.178523	14
	2.7	3	0.179861	3		2.9	5	0.2784	15
	2.7	6	0.252186	5		2.9	5	0.274809	16
	3	9	0.117241	25		2.9	5	0.244304	17
	3.1	3	0.18325	1		2.9	5	0.311326	18
	3.1	3	0.230114	2		2.9	5	0.224299	19
	3.1	3	0.162681	3		2.5	4	0.303779	17
	3.1	3	0.254717	4		2.9	5	0.25232	20
	3.1	3	0.228824	5		2.9	5	0.215108	21
	3.1	3	0.189394	6		2.9	5	0.242763	22
	3.1	3	0.253704	7		2.9	5	0.35625	23
	3.1	3	0.185981	8		2.9	5	0.380537	24
	3.1	3	0.17	9		2.9	5	0.278467	25
	2.7	6	0.171923	6		2.9	6	0.255959	1
	3.1	3	0.306024	10		2.9	6	0.198276	2
	3.1	3	0.233168	11		2.9	6	0.22126	3
	3.1	3	0.194872	12		2.9	6	0.243617	4
	3.1	3	0.375806	13		2.5	4	0.416142	18
	3.1	3	0.272222	14		2.9	6	0.46592	5
	3.1	3	0.208772	15		2.9	6	0.2335	6
	3.1	3	0.283955	16		2.9	6	0.202837	7
	3.1	3	0.224444	17		2.9	6	0.173141	8
	3.1	3	0.244262	18		2.9	6	0.202765	9
	3.1	3	0.19375	19		2.9	6	0.335294	10
	2.7	6	0.259459	7		2.9	6	0.25878	11
	3.1	3	0.29	20		2.9	6	0.164474	12
	3.1	3	0.295522	21		2.9	6	0.251333	13
	3.1	3	0.224227	22		2.9	6	0.168452	14
	3.1	3	0.286184	23		2.5	4	0.296903	19
	3.1	3	0.429583	24		2.9	6	0.272541	15
	3.1	3	0.301626	25		2.9	6	0.245327	16
	3.1	6	0.142272	1		2.9	6	0.213333	17
	3.1	6	0.150347	2		2.9	6	0.232584	18
	3.1	6	0.1494	3		2.9	6	0.207325	19
	3.1	6	0.148129	4		2.9	6	0.224107	20
	2.7	6	0.184211	8		2.9	6	0.18964	21
	3.1	6	0.2225	5		2.9	6	0.178571	22
	3.1	6	0.158383	6		2.9	6	0.338265	23
	3.1	6	0.228736	7		2.9	6	0.374699	24
	3.1	6	0.161364	8		2.5	4	0.343885	20
	3.1	6	0.159402	9		2.9	6	0.26677	25
	3.1	6	0.155215	10		2.9	7	0.219318	1
	3.1	6	0.18629	11		2.9	7	0.192523	2
	3.1	6	0.15443	12		2.9	7	0.215809	3
	3.1	6	0.229348	13		2.9	7	0.236283	4
	3.1	6	0.187903	14		2.9	7	0.353186	5
	2.7	6	0.174038	9		2.9	7	0.231111	6
	3.1	6	0.211207	15		2.9	7	0.177647	7
	3.1	6	0.205645	16		2.9	7	0.159322	8
	3.1	6	0.161712	17		2.9	7	0.160494	9
	3.1	6	0.200316	18		2.5	4	0.290476	21
	3.1	6	0.147297	19		2.9	7	0.250296	10
	3.1	6	0.176364	20		2.9	7	0.251395	11
	3.1	6	0.181897	21		2.9	7	0.152825	12
	3.1	6	0.154808	22		2.9	7	0.253704	13
	3.1	6	0.168636	23		2.9	7	0.164072	14
	3.1	6	0.286813	24		2.9	7	0.256579	15
	2.7	6	0.17	10		2.9	7	0.231855	16
	3.1	6	0.14084	25		2.9	7	0.191429	17
	3.1	9	0.130071	1		2.9	7	0.229048	18
	3.1	9	0.140608	2		2.9	7	0.168919	19
	3.1	9	0.143855	3		2.5	4	0.333197	22
	3.1	9	0.140385	4		2.9	7	0.216667	20
	3.1	9	0.157759	5		2.9	7	0.171774	21
	3.1	9	0.143	6		2.9	7	0.166797	22
	3.1	9	0.22375	7		2.9	7	0.27395	23
	3.1	9	0.136436	8		2.9	7	0.355337	24
	3.1	9	0.132836	9		2.9	7	0.261443	25
	2.7	6	0.210309	11		2.9	8	0.209184	1
	3.1	9	0.137544	10		2.9	8	0.181905	2
	3.1	9	0.139167	11		2.9	8	0.204196	3
	3.1	9	0.143557	12		2.9	8	0.220979	4
	3.1	9	0.207025	13		2.5	4	0.456	23
	3.1	9	0.151163	14		2.9	8	0.299405	5
	3.1	9	0.145652	15		2.9	8	0.21746	6
	3.1	9	0.163333	16		2.9	8	0.177083	7
	3.1	9	0.131221	17		2.9	8	0.155385	8
	3.1	9	0.158095	18		2.9	8	0.155026	9
	3.1	9	0.117784	19		2.9	8	0.246354	10
	2.7	6	0.167014	12		2.9	8	0.237952	11
	3.1	9	0.1708	20		2.9	8	0.151437	12
	3.1	9	0.155814	21		2.9	8	0.253274	13
	3.1	9	0.127742	22		2.9	8	0.156686	14
	3.1	9	0.1475	23		2.9	8	0.216058	15
	3.1	9	0.192405	24		2.9	8	0.233628	16
	3.1	9	0.115574	25		2.9	8	0.161972	17
	3.2	3	0.178075	1		2.9	8	0.217623	18
	3.2	3	0.22449	2		2.9	8	0.154196	19
	3.2	3	0.161146	3		2.9	8	0.2125	20
	3.2	3	0.254624	4		2.9	8	0.151777	21
	2.7	6	0.25123	13		2.9	8	0.162587	22
	3.2	3	0.221429	5		2.9	8	0.266818	23
	3.2	3	0.185075	6		2.9	8	0.350701	24
	3.2	3	0.244853	7		2.5	4	0.364979	25
	3.2	3	0.187079	8		2.9	8	0.25	25
	3.2	3	0.166204	9		2.9	9	0.183544	1
	3.2	3	0.301143	10		2.9	9	0.16049	2
	3.2	3	0.227232	11		2.9	9	0.203672	3
	3.2	3	0.19291	12		2.9	9	0.17973	4
	3.2	3	0.360776	13		2.9	9	0.266225	5
	3.2	3	0.270879	14		2.9	9	0.188806	6
	2.7	6	0.207534	14		2.9	9	0.168947	7
	3.2	3	0.208099	15		2.9	9	0.147105	8
	3.2	3	0.2764	16		2.9	9	0.151225	9
	3.2	3	0.219403	17		2.5	5	0.372727	1
	3.2	3	0.231176	18		2.9	9	0.218534	10
	3.2	3	0.192029	19		2.9	9	0.186184	11
	3.2	3	0.27957	20		2.9	9	0.151734	12
	3.2	3	0.280435	21		2.9	9	0.224597	13
	3.2	3	0.218354	22		2.9	9	0.153141	14
	3.2	3	0.272892	23		2.9	9	0.183333	15
	3.2	3	0.412081	24		2.9	9	0.21568	16
	2.7	3	0.277174	4		2.9	9	0.147857	17
	2.7	6	0.237975	15		2.9	9	0.203061	18
	3.2	3	0.298734	25		2.9	9	0.144262	19
	3.2	6	0.141071	1		2.5	5	0.254091	2
	3.2	6	0.150641	2		2.9	9	0.210432	20
	3.2	6	0.147119	3		2.9	9	0.145313	21
	3.2	6	0.148375	4		2.9	9	0.161724	22
	3.2	6	0.219608	5		2.9	9	0.262308	23
	3.2	6	0.155389	6		2.9	9	0.317784	24
	3.2	6	0.225362	7		2.9	9	0.230645	25
	3.2	6	0.15963	8		3.1	3	0.370866	1
	3.2	6	0.156618	9		3.1	3	0.258273	2
	2.7	6	0.21634	16		3.1	3	0.293089	3
	3.2	6	0.152083	10		3.1	3	0.456846	4
	3.2	6	0.180588	11		2.5	5	0.283704	3
	3.2	6	0.151342	12		3.1	3	0.510442	5
	3.2	6	0.224719	13		3.1	3	0.271233	6
	3.2	6	0.177326	14		3.1	3	0.274074	7
	3.2	6	0.207265	15		3.1	3	0.238953	8
	3.2	6	0.201667	16		3.1	3	0.258381	9
	3.2	6	0.157282	17		3.1	3	0.484797	10
	3.2	6	0.192647	18		3.1	3	0.299351	11
	3.2	6	0.146479	19		3.1	3	0.19877	12
	2.7	6	0.184722	17		3.1	3	0.389754	13
	3.2	6	0.170755	20		3.1	3	0.25042	14
	3.2	6	0.173333	21		2.5	5	0.313488	4
	3.2	6	0.15	22		3.1	3	0.278505	15
	3.2	6	0.167073	23		3.1	3	0.31164	16
	3.2	6	0.279167	24		3.1	3	0.342857	17
	3.2	6	0.137868	25		3.1	3	0.335784	18
	3.2	9	0.128147	1		3.1	3	0.25099	19
	3.2	9	0.137429	2		3.1	3	0.298485	20
	3.2	9	0.14157	3		3.1	3	0.236207	21
	3.2	9	0.139947	4		3.1	3	0.262162	22
	2.7	6	0.218504	18		3.1	3	0.40199	23
	3.2	9	0.156641	5		3.1	3	0.550704	24
	3.2	9	0.141755	6		2.5	5	0.564286	5
	3.2	9	0.220455	7		3.1	3	0.394783	25
	3.2	9	0.13489	8		3.1	4	0.307937	1
	3.2	9	0.131152	9		3.1	4	0.215254	2
	3.2	9	0.137175	10		3.1	4	0.277444	3
	3.2	9	0.136638	11		3.1	4	0.369048	4
	3.2	9	0.140933	12		3.1	4	0.49291	5
	3.2	9	0.205137	13		3.1	4	0.255325	6
	3.2	9	0.147866	14		3.1	4	0.202134	7
	2.7	6	0.158019	19		3.1	4	0.196729	8
	3.2	9	0.143182	15		3.1	4	0.242466	9
	3.2	9	0.160909	16		2.5	5	0.28785	6
	3.2	9	0.128733	17		3.1	4	0.422599	10
	3.2	9	0.155263	18		3.1	4	0.2728	11
	3.2	9	0.115608	19		3.1	4	0.180769	12
	3.2	9	0.167568	20		3.1	4	0.302258	13
	3.2	9	0.151205	21		3.1	4	0.202486	14
	3.2	9	0.124051	22		3.1	4	0.26773	15
	3.2	9	0.147704	23		3.1	4	0.265839	16
	3.2	9	0.184783	24		3.1	4	0.236184	17
	2.7	6	0.199286	20		3.1	4	0.326866	18
	3.2	9	0.113191	25		3.1	4	0.216667	19
	3.3	3	0.174138	1		2.5	5	0.2425	7
	3.3	3	0.220874	2		3.1	4	0.26844	20
	3.3	3	0.15977	3		3.1	4	0.212992	21
	3.3	3	0.244388	4		3.1	4	0.257143	22
	3.3	3	0.221078	5		3.1	4	0.350565	23
	3.3	3	0.180657	6		3.1	4	0.51087	24
	3.3	3	0.243382	7		3.1	4	0.289922	25
	3.3	3	0.181868	8		3.1	5	0.255592	1
	3.3	3	0.164167	9		3.1	5	0.19	2
	2.7	6	0.206452	21		3.1	5	0.234921	3
	3.3	3	0.300743	10		3.1	5	0.255114	4
	3.3	3	0.222115	11		2.5	5	0.206944	8
	3.3	3	0.185616	12		3.1	5	0.456375	5
	3.3	3	0.351481	13		3.1	5	0.219792	6
	3.3	3	0.26713	14		3.1	5	0.201744	7
	3.3	3	0.204701	15		3.1	5	0.168085	8
	3.3	3	0.273932	16		3.1	5	0.208824	9
	3.3	3	0.216667	17		3.1	5	0.418579	10
	3.3	3	0.228652	18		3.1	5	0.261607	11
	3.3	3	0.187931	19		3.1	5	0.161561	12
	2.7	6	0.167978	22		3.1	5	0.243939	13
	3.3	3	0.268519	20		3.1	5	0.170629	14
	3.3	3	0.275	21		2.5	5	0.273485	9
	3.3	3	0.215979	22		3.1	5	0.26162	15
[truncated: 1,377 more rows]
