# Supplementary figures and images for: Putting the theory into ‘burstlet theory’ with a biophysical model of burstlets and bursts in the respiratory preBötzinger complex
Source: eLife journal article supplement (doi:10.7554/elife.75713), 2022-04-05

A

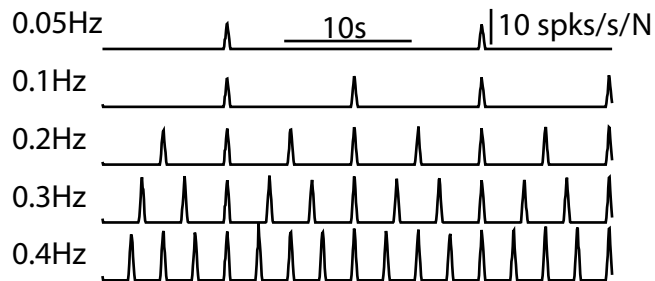

B

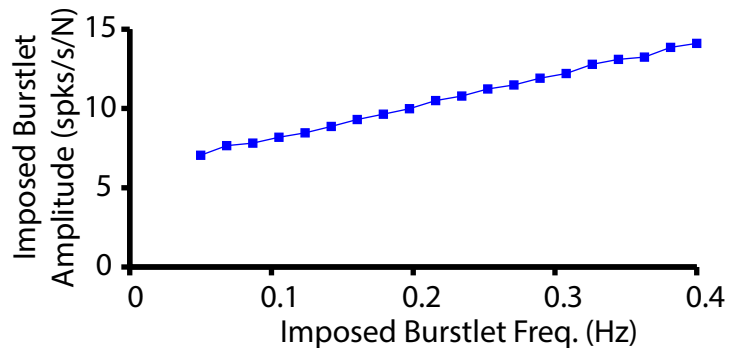

C

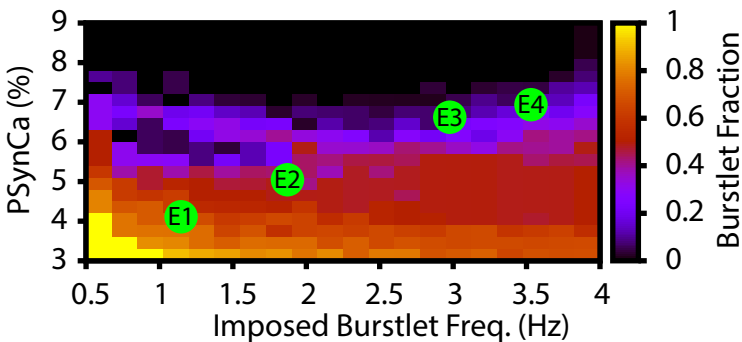

D

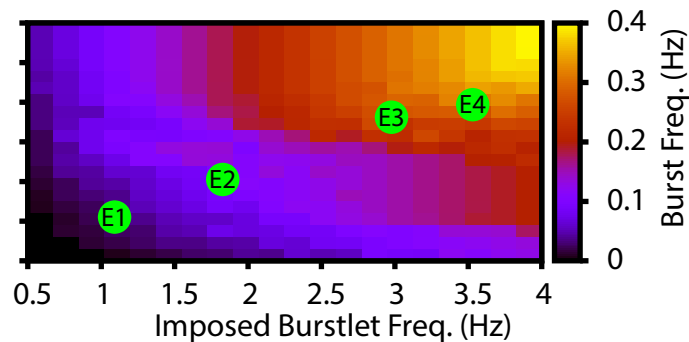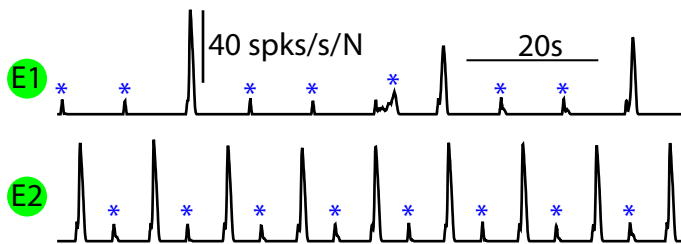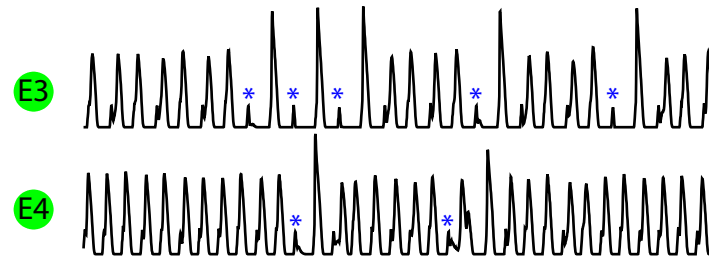

Supplement: supp [file elife-75713-supp-v1.zip]

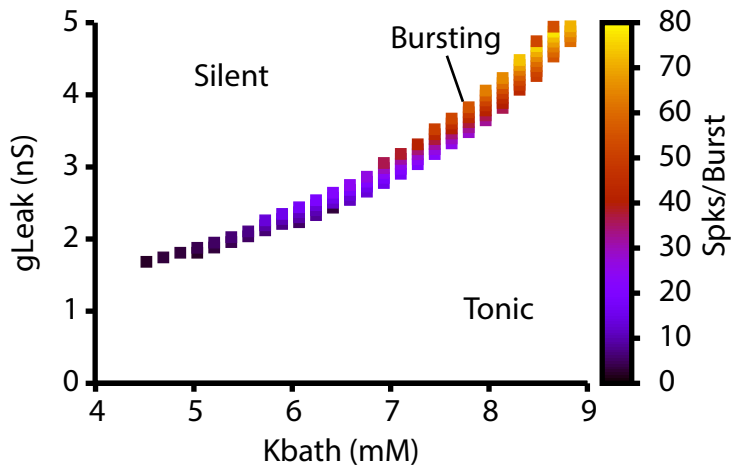

Supplement: supp [file elife-75713-supp-v1.zip]

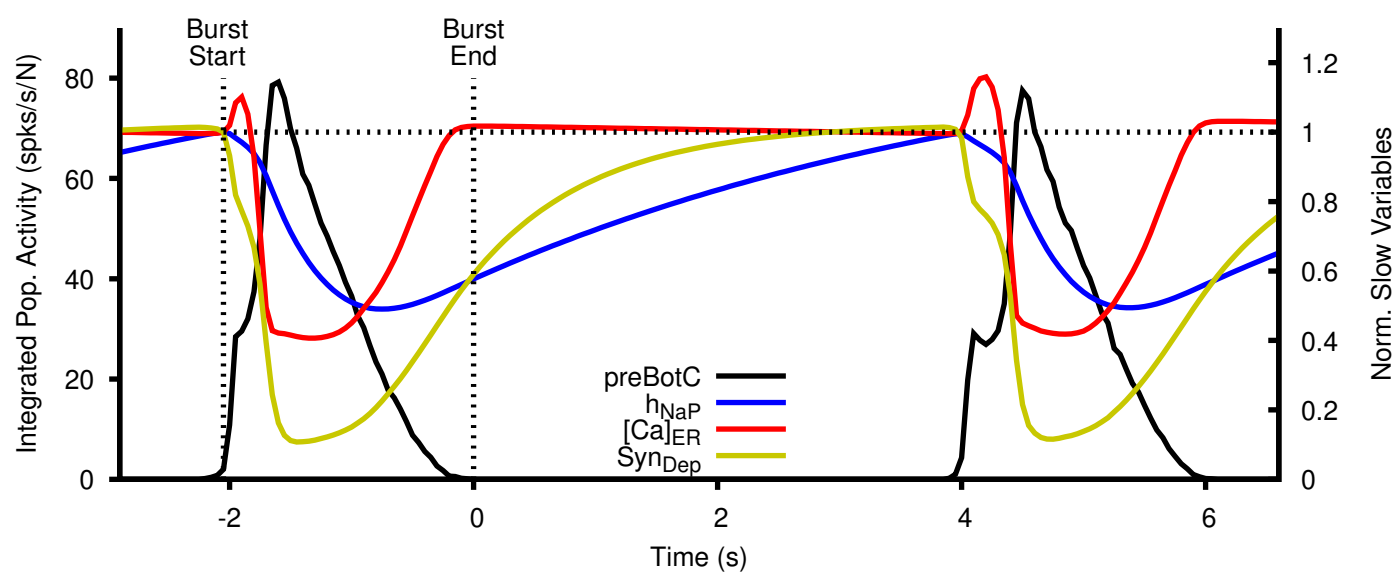

Supplement: supp [file elife-75713-supp-v1.zip]

A1

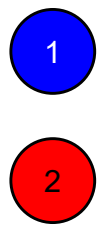

A2

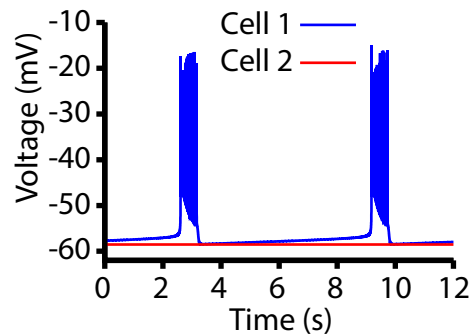

A3

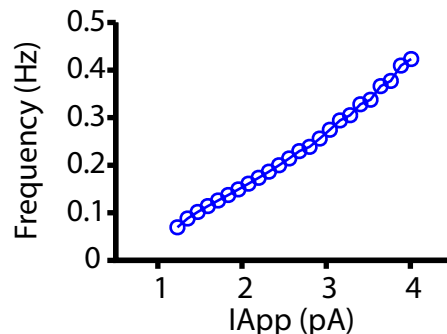

A4

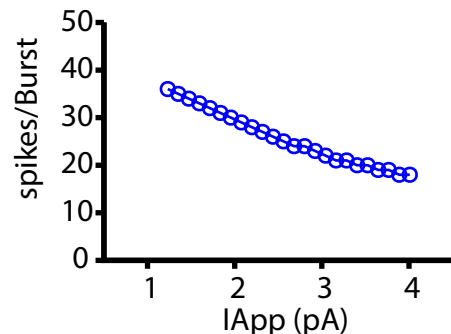

B1

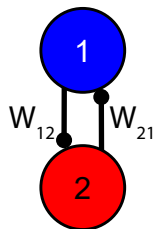

B2

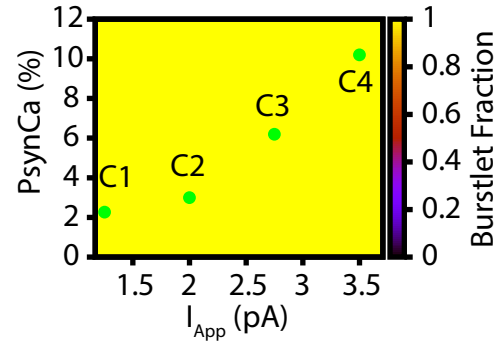

B3

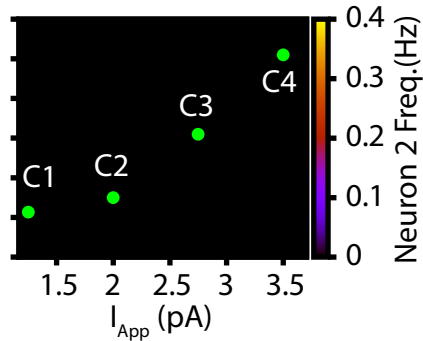

B4

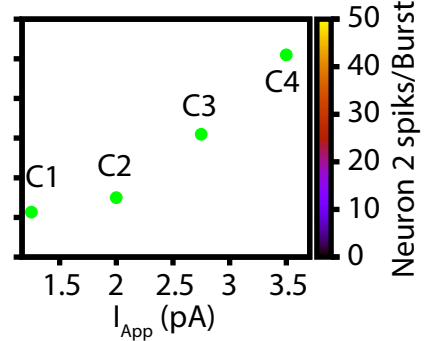

C1

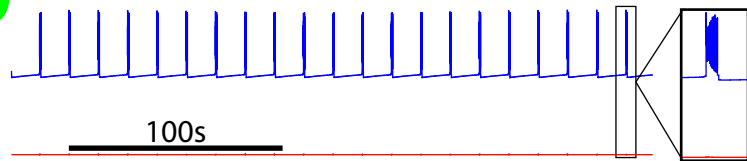

C2

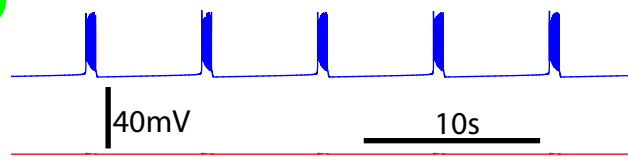

C3

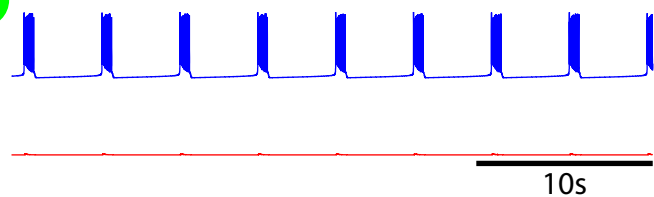

C4

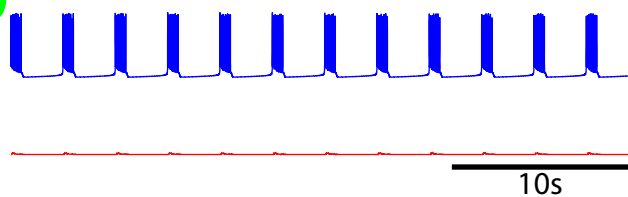

Supplement: supp [file elife-75713-supp-v1.zip]
